Implementation of cotrimoxazole and isoniazid – preventive therapies for people with HIV.

## 20 Abstract

21 **Background:** Cotrimoxazole and isoniazid preventive therapy (CPT, IPT) have been shown  
22 to be efficacious therapies for the prevention of opportunistic infections and tuberculosis (TB)  
23 among people living with human immunodeficiency virus (HIV). Despite governments' efforts  
24 to translate World Health Organization recommendations into practice, implementation  
25 remains challenging. This review aimed to explore and compare CPT and IPT with respect  
26 to similarities and differences of barriers identified across high TB/HIV burden countries. A  
27 secondary objective was to identify facilitators for implementing both preventive therapies.

28 **Methods:** We searched MEDLINE, Web of Science and SCOPUS databases for peer-  
29 reviewed literature published before September 2020. We extracted and synthesized our  
30 findings using Maxqda software. We applied framework synthesis in conjunction with  
31 metasummary to compare both therapies with respect to similarities and differences of  
32 barriers identified across seven health system components (in line with the modified WHO's  
33 Framework for action). Protocol registration: PROSPERO (CRD42019137778).

34 **Findings:** We identified four hundred and eighty-two papers, of which we included forty for  
35 review. Although most barrier themes were identical for both preventive therapies, we  
36 identified seven intervention-specific themes. Like for CPT, barriers identified for IPT were  
37 most frequently classified as 'service delivery-related barriers' and 'patient & community-  
38 related barriers'. 'Health provider-related barriers' played an additional important role for  
39 implementing of IPT. Most facilitators identified referred to health system strengthening  
40 activities.

41 **Conclusions:** For researchers with limited working experience in high TB/HIV burden  
42 countries, this review can provide valuable insights about barriers that may arise at different  
43 levels of the health system. For policymakers in high TB/HIV burden countries, this review  
44 offers strategies for improving the delivery of IPT (or any newer therapy regimen) for the

Implementation of cotrimoxazole and isoniazid – preventive therapies for people with HIV.

45 prevention of TB. Based on our findings, we suggest initial and continuous stakeholder  
46 involvement, a focus on the efficient use and reinforcement of existing resources for health.

47 **Key words:** Implementation, HIV, Tuberculosis, Cotrimoxazole, Isoniazid, Systematic  
48 review, Metasummary, Health systems strengthening, Global Health

Implementation of cotrimoxazole and isoniazid – preventive therapies for people with HIV.

## 49 Introduction

## 50 Background

51 In 2019, 38 million people worldwide were living with the human immunodeficiency  
52 virus (HIV) [1]. An estimated quarter of the world's population was latently infected with  
53 *Mycobacterium tuberculosis*; 10 million developed active tuberculosis (TB) [2, 3]. The fact  
54 that HIV-positive individuals have 20 times higher risk of developing active TB disease  
55 compared to HIV-negative individuals has been described as a lethal combination [4], which  
56 has transformed many low- and middle-income countries (LMIC) into countries with a high  
57 dual burden of TB and HIV [2]. The latest UNAIDS report continues to present TB as the  
58 leading cause of death among people living with HIV (PLHIV), accounting for around one in  
59 three AIDS-related deaths worldwide [1]. This review focuses on the implementation of two  
60 of the most important preventive therapies for PLHIV in countries with a high burden of  
61 TB/HIV: cotrimoxazole (CTZ) and isoniazid (INH).

62 Cotrimoxazole (CTZ) is a fixed-dose combination of trimethoprim/ sulfamethoxazole  
63 that combines broad antimicrobial activity with immunomodulatory properties. Besides  
64 preventing some AIDS-associated opportunistic diseases (*Pneumocystis jirovecci*  
65 pneumonia (PCP), toxoplasmosis), CTZ has shown to be successful in reducing malaria,  
66 severe bacterial infections, and mortality among PLHIV. As a result, World Health  
67 Organization (WHO) recommends cotrimoxazole preventive therapy (CPT) lifelong for  
68 PLHIV in resource-limited settings where malaria and, or severe bacterial infections are  
69 highly prevalent, irrespectively of their CD4 count. In settings were neither malaria nor  
70 severe bacterial infections are highly prevalent, CPT is recommended for PLHIV with severe  
71 or advanced HIV disease (WHO clinical stage 3 or 4, or CD4 count below 350 cells/mm<sup>3</sup>),  
72 and may be discontinued for those with evidence of immune recovery or viral suppression on  
73 antiretroviral treatment (ART). Adults, including pregnant women, children and adolescents

Implementation of cotrimoxazole and isoniazid – preventive therapies for people with HIV.

74 with HIV, and HIV-exposed but uninfected infants, as well as PLHIV with active TB, are  
75 eligible for CPT, including those concurrently receiving ART [5].

76 Isoniazid (isonicotinylhydrazide or INH) is the most common type of TB preventive  
77 therapy. With its anti-mycobacterial activity, isoniazid monotherapy is prescribed to treat latent  
78 TB infection and prevent the progression from latent to active TB. WHO recommends at least  
79 six months of isoniazid preventive therapy (IPT) to people at risk of TB living in resource-  
80 constrained and high TB and HIV prevalence settings. PLHIV comprise a major risk group for  
81 TB, among which IPT has shown to reduce TB disease and mortality irrespective of receiving  
82 ART. Therefore, PLHIV unlikely to have active TB, are eligible for IPT. This includes HIV-  
83 positive positive adults including pregnant women, adolescents, infants aged under 12 months  
84 who are in contact with a TB case, and children older than 12 months who have no contact  
85 with a TB case. HIV-negative children aged under 5 years who are household contacts of  
86 people with bacteriologically confirmed pulmonary TB comprise another target group for IPT.  
87 Independent of the target group, only people with unknown or a positive tuberculin skin test  
88 (TST) unlikely to have active TB are eligible for IPT. In the absence of TST, patients should be  
89 screened for TB according to a clinical algorithm. Those who do not report any of the  
90 symptoms of current cough, fever, weight loss or night sweats are unlikely to have active TB  
91 and should be offered preventive therapy, irrespective of the degree of immunosuppression  
92 and including those who have previously been treated for TB [4].

## 93 **Rationale**

94 Data from clinical trials and observational studies demonstrated that both preventive  
95 therapies are well-tolerated, highly efficacious, and cost-effective among PLHIV [6-10],  
96 resulting in WHO recommendations that were first adopted almost two decades ago [11, 12].  
97 With increasing evidence supporting the benefits of the preventive therapies for PLHIV,  
98 WHO recommendations have been even expanded with regard to therapy duration and  
99 target populations indicated for CPT and IPT in today's recommendations [5, 13]. Although

Implementation of cotrimoxazole and isoniazid – preventive therapies for people with HIV.

100 efforts have been made by governments of high TB/HIV burden countries and their partners  
101 to translate these recommendations into national policy and practice, implementation of both  
102 preventive therapies has been challenging and coverage has been low [2, 14, 15].

## 103 **Objectives**

104 The primary objectives of this review were to explore barriers to both preventive  
105 therapies reported across high TB/HIV burden countries (as per WHO [2]) and to generate  
106 explanatory knowledge of why their implementation has been so challenging. Additionally,  
107 this review aimed to compare both preventive therapies with respect to similarities and  
108 differences of barriers. A secondary objective was to identify strategies (facilitators) to  
109 improve the implementation of both preventive therapies. To identify relevant research, the  
110 broad question: “Which are the barriers to and facilitators for the implementation of  
111 preventive therapies (CPT, IPT) in countries with a high burden of HIV and TB?” was  
112 designed using FINER criteria [16] and the PICo framework: Population, Interest, Context  
113 (modified PICO) [17] (S1 Additional file). Barriers were defined as factors that limit, challenge  
114 or inhibit implementation, access, provision, delivery, or adherence to CPT or IPT.  
115 Facilitators were defined as factors that facilitate, support, encourage, or enable the  
116 implementation, access, provision, delivery, or adherence to CPT or IPT. In the published  
117 literature, the treatment of interest may be referred to as ‘preventive therapy’, ‘preventive  
118 treatment’, ‘prophylaxis’ or ‘prophylactic treatment’.

## 119 **Methods**

### 120 **Protocol and registration**

121 Following the Joanna Briggs Institute (JBI) methodology for mixed methods  
122 systematic review, we developed a protocol prior to undertaking the review [17, 18], which  
123 we registered and published in PROSPERO (CRD42019137778) (S2 Additional file). As  
124 outlined in section 8.5.1 of the JBI Reviewer’s Manual, we applied a convergent integrated

Implementation of cotrimoxazole and isoniazid – preventive therapies for people with HIV.

125 approach to synthesis and integration [18]. We followed PRISMA guidance and reported our  
126 findings, according to the PRISMA checklist (S3 Additional file) [19].

## 127 **Eligibility criteria**

128 Only peer-reviewed scientific papers meeting all of the following eligibility criteria  
129 were included: (1) papers reporting barriers and, or facilitators for either or both preventive  
130 therapies (CPT, IPT), sometimes in the literature also referred to as ‘preventive treatment’,  
131 ‘prophylaxis’, or ‘prophylactic treatment’. (2) Only studies conducted in high TB/HIV burden  
132 countries defined by WHO in the period 2016 to 2020 [2]; (3) published in English language;  
133 (4) until the 4th of September 2020 were eligible for this review. (5) Studied populations  
134 eligible were: (a) HIV patients or PLHIV. Although HIV-negative population groups may be  
135 eligible for IPT (e.g. household contacts of TB cases), HIV-negative population groups were  
136 not within the scope of this review. However, for CPT, HIV-exposed babies (HIV suspects)  
137 were eligible study populations, as well as patients co-infected with TB and HIV. Other  
138 studied populations eligible were (b) healthcare providers, also referred to as health  
139 professionals; (c) caregivers (i.e. parents or guardians of child patients involved in the  
140 preventive therapy collection or drug administration process); (d) any other stakeholder  
141 identified as influential in the overall implementation process of either IPT or CPT, and (e)  
142 countries defined by WHO as high TB/HIV burden countries [2]. Since this systematic review  
143 aims to analyse studies reporting primary data, we excluded editorial comments and  
144 systematic reviews. However, we screened reference lists of systematic reviews for original  
145 research eligible for this review. We included studies conducted in multi-sites or multiple  
146 countries only if barriers/ facilitators were separately analysed and reported per site or  
147 country. Because of the limited number of published qualitative studies on this topic, we  
148 included primary studies of any design (i.e. qualitative, quantitative, multimethod and mixed  
149 methods studies).

Implementation of cotrimoxazole and isoniazid – preventive therapies for people with HIV.

## 150 **Information sources and search**

151 In February 2018, we systematically searched the electronic databases MEDLINE®,  
152 Web of Science® and Scopus® for original articles using the search terms presented in (S4  
153 Additional file). We repeated the search in September 2020 to identify additional literature  
154 published after February 2018 and updated our review [20]. The full electronic search  
155 strategy is available for each database search (S4 Additional file). We searched references  
156 of systematic reviews only if the systematic review was relevant to the study question.

## 157 **Study selection**

158 Following the search, PM collated and uploaded all identified citations into Endnote X9  
159 reference management software, and removed all duplicates. We both independently  
160 screened and assessed all titles and abstracts against the predefined eligibility criteria for  
161 this review. Non-relevant studies and studies reporting from countries other than the thirty  
162 high TB/HIV burden countries were excluded during this initial title and abstract screening  
163 process. When the decision on exclusion was not clear, we included the study for full-text  
164 screening. PM retrieved the full-text of all potentially relevant studies. Eventually, we both  
165 independently assessed the full-text of the remaining studies against the eligibility criteria.  
166 Studies that did not meet all eligibility criteria were excluded, and reasons for exclusion were  
167 recorded. Studies that met all eligibility criteria were included. We compared our decision  
168 (i.e. inclusion/ exclusion and reason for exclusion) for each of the selected studies,  
169 discussed their full-text and resolved any disagreement concerning our decision through  
170 discussion.

## 171 **Data collection process and data items**

172 We developed a data extraction table which we initially tested on three studies to  
173 ensure that all relevant data items could be extracted. PM extracted the following data items  
174 from each included study: first author, year of publication, geographic origin (one or multiple



Implementation of cotrimoxazole and isoniazid – preventive therapies for people with HIV.

175 countries defined as high burden country for TB/ HIV), context (e.g. urban, rural), study type,  
176 study subject(s) of interest, sample size of study subjects for each data collection approach,  
177 study aim(s), data collection approach (e.g. interviews, record review), and findings related  
178 to the review question (i.e. barrier(s) and, or facilitator(s) for CPT, IPT, or both). LVL checked  
179 the extracted data items for accuracy and added or modified data items were necessary. We  
180 compared the data we individually extracted and resolved any disagreement through  
181 discussion.

## 182 **Data transformation**

183 As outlined in Section 8.5.1 of the JBI Reviewer's Manual, we extracted findings (barriers  
184 and facilitators) from quantitative, qualitative and mixed methods studies. Qualitative findings  
185 including the qualitative component of mixed methods studies were extracted as presented  
186 in the original research paper (e.g. themes, corresponding illustrations, paragraphs of textual  
187 description). We transformed quantitative findings, including the quantitative component of  
188 mixed methods studies, into textual description disregarding the effect size [18]. For  
189 example: "A quantitative study reported a twenty per cent decrease in cotrimoxazole stock-  
190 outs ( $p < 0.05$ ) among health facilities that had employed trained pharmacy personnel,  
191 compared to health facilities without any trained pharmacy personnel." From this fictitious  
192 example, the following information would have been extracted: (1) Finding: Facilitator for  
193 CPT; (2) Description: employment of trained pharmacy personnel has shown to decrease  
194 stock-outs. Finally, we merged qualitative findings and transformed study findings together  
195 into one data set.

## 196 **Risk of bias in individual studies**

197 Due to the methodological diversity of the studies included in MMSR's, the selection  
198 of an appropriate tool that allows assessing the methodological quality of included studies is  
199 particularly challenging for this type of review. For the critical appraisal of methodological

## Implementation of cotrimoxazole and isoniazid – preventive therapies for people with HIV.

200 quality (internal validity) of the included studies, we selected the “Mixed Methods Appraisal  
201 tool” (MMAT), version 2018 [21]. The MMAT is a critical appraisal tool designed for the  
202 appraisal process of mixed methods reviews because it specifically addresses items related  
203 to the various study designs being evaluated in a single tool [21]. Methodological quality  
204 criteria to be rated in the MMAT are specific for (a) qualitative research, (b) randomised  
205 controlled trials, (c) non-randomised studies, (d) quantitative descriptive studies, and (e)  
206 mixed methods studies (S5 Additional file). As reported by the Cochrane Qualitative and  
207 Implementation Methods Group, this tool has been used widely in systematic reviews and  
208 has the advantage of being able to assess interdependent qualitative and quantitative  
209 elements of mixed-methods research [22]. We independently assessed methodological  
210 quality based on the details published in the studies included in our review using the MMAT  
211 [21]. We resolved any disagreement in rating through discussion. To preserve the  
212 transparency of the risk of bias assessment, we documented all individual ratings for each  
213 study included in this review. For studies that failed to meet more than one quality criteria,  
214 we discussed whether to exclude the study. However, we also considered that our study's  
215 focus was on qualitative findings and on the generation of explanatory knowledge of why the  
216 implementation of both preventive therapies has been so challenging. Due to the risk of  
217 excluding insights relevant for a good understanding of the phenomenon under study, which  
218 may only become apparent at the point of synthesis, bias was toward inclusion [23, 24].

## 219 **Qualitative synthesis**

220 We applied framework synthesis, a highly transparent and deductive approach  
221 recommended for the synthesis of evidence on complex interventions [25]. This approach  
222 allows combining elements of critical realistic and subjective idealistic epistemology. We  
223 analysed our data set using MAXQDA Analytics Pro software (Release 18.1.1.), iteratively  
224 coding and sub-coding the extracted results. Both researchers individually defined, cross-

## Implementation of cotrimoxazole and isoniazid – preventive therapies for people with HIV.

225 checked, discussed and refined the code system. We resolved disagreement through  
226 discussion.

227 Inspired by Getahun et al. (2010) [26], we applied a priori defined modified version of  
228 the WHO's Framework for action [27] to analyse and present barriers to preventive  
229 therapies. First, we assigned each extracted result (i.e. barrier) to one of the seven health  
230 system components based on the level at which they hindered implementation. Health  
231 system components include 'Patient & community', 'Health providers', 'Clinical information',  
232 'Leadership & governance', 'Pharmaceutical management', 'Service delivery' and  
233 'Financing'. We slightly modified three of the original component names and added the  
234 component "Patient & community" as the seventh component to the existing framework.  
235 Second, we thematically analysed each barrier considering its contextual description. Third,  
236 to summarise the comprehensive barrier descriptions, we applied metasummary.  
237 Metasummary is a quantitatively oriented aggregation of qualitative findings first proposed by  
238 Sandalowsky, Barroso and Voils (2007) [24, 28]. Mapping of key barriers across the seven  
239 health system components facilitated comparison of similarities and differences of barriers  
240 between both preventive therapies [25].

241 For facilitators, we applied 'the preventive therapy cascade' as framework for  
242 evidence synthesis. After familiarising ourselves with the extracted data set, reading and re-  
243 reading the identified facilitators and exploring underlying patterns, we found that facilitators  
244 generally aimed to enhance specific activities (e.g. providers' prescribing practices, patients'  
245 adherence) along a series of steps involved in the implementation of preventive therapies.  
246 Eventually, the preventive therapy cascade emerged as most relevant framework for the  
247 synthesis and presentation of our data, featuring each step along the preventive therapy  
248 cascade with all its bottlenecks. We assigned each extracted result to one or multiple steps  
249 along the cascade, followed by thematic analysis, inductively grouping facilitators into  
250 overarching themes [25].

Implementation of cotrimoxazole and isoniazid – preventive therapies for people with HIV.

## 251 **Risk of bias across studies**

252           Published studies are more likely to report statistically significant results compared to  
253 unpublished studies. Hence, publication bias compromises reviewers' ability to assemble a  
254 complete body of evidence that is not biased towards "positive findings". Although  
255 publication bias is primarily a concern for systematic reviews evaluating an intervention's  
256 effect, it is debatable whether the consequences of such bias is as potentially serious in  
257 qualitative evidence synthesis [29]. Dissemination bias (which encompasses publication  
258 bias) is gaining increasing attention in qualitative evidence synthesis. More research is  
259 required on how to assess dissemination bias in the context of qualitative evidence  
260 syntheses [30].

## 261 **Additional analysis**

262           Due to the complexities associated with findings derived from both streams of  
263 evidence and the impact of data transformation and integration on the grading process, an  
264 assessment of the certainty of the evidence is currently not recommended for MMSR's [18].  
265 However, we analysed heterogeneity of the countries and the study subjects represented in  
266 this review and discussed potential limitations resulting from a heterogeneous representation  
267 of these variables.

## 268 **Results**

### 269 **Study selection**

270           The PRISMA Flow Diagram presents the number of papers included throughout the  
271 selection process, alongside with the reasons for exclusion (Fig 1).

272 **Fig 1. PRISMA Flow Diagram.**

Implementation of cotrimoxazole and isoniazid – preventive therapies for people with HIV.

## 273 **Description of studies included in the systematic review**

274 Forty studies were included for review, fourteen related to CPT [14, 15, 31-42] ;  
275 twenty-eight related to IPT [14, 38, 43-68], including two studies that reported findings on  
276 both preventive therapies [14, 38]. While facilitators were reported in all studies, barriers  
277 were not presented in three studies [32, 40, 41], all related to CPT. Comparing the year of  
278 the first publication included for both preventive therapies, we found that the first study  
279 included on IPT has been published fourteen years before the first study on CPT (1995,  
280 2009) [38, 44]. All studies related to CPT were carried out in WHO African Region [14, 15,  
281 31-42], while studies related to IPT also included WHO South East Asia Region [47, 61, 62],  
282 WHO Western Pacific Region [47] and WHO Region of the Americas [46, 47] (Fig 2).

283 **Fig 2. Regional representation of countries included in this review.** (A) High TB/HIV burden  
284 countries represented in studies reporting barriers or facilitators for cotrimoxazole preventive therapy (n= 7):  
285 Ghana, Malawi, South Africa, Tanzania, Uganda, Zimbabwe and Lesotho (published between 2009 and 2018).  
286 (B) High TB/HIV burden countries represented in studies on IPT (n= 22): Angola, Botswana, Brazil, China, DRC,  
287 Ethiopia, India, Indonesia, Kenya, Lesotho, Liberia, Malawi, Mozambique, Myanmar, Nigeria, South Africa,  
288 Swaziland, Tanzania, Thailand, Uganda, Zambia and Zimbabwe (published between 1995 and 2020). Source:  
289 Own visualization of review data: <https://www.amcharts.com/>.

290 Among the thirty countries defined by WHO as countries with a high burden of TB  
291 and HIV [2], we identified research from twenty-three countries (77%) reporting barriers or  
292 facilitators to either or both preventive therapies. Countries were disproportionately  
293 represented. The majority of studies were conducted in South Africa (n = 11) [37, 42, 47, 50-  
294 52, 54, 63-65, 67], Uganda (n = 9) [31-33, 38-40, 44, 56, 66], Tanzania (n = 5) [15, 35, 36,  
295 47, 60], Kenya (n = 4) [45, 47, 49, 68], Zimbabwe (n = 3) [33, 34, 47], Ethiopia (n = 3) [47,  
296 53, 58], and Nigeria (n = 3) [43, 47, 57]. Another fifteen countries were represented in only  
297 one or two studies. All studies, except three [33, 47, 49] based their findings on data  
298 collected in one single country. Half of the studies missed to mention the context where the  
299 study was carried out. Among the twenty studies that reported the context, ten were

## Implementation of cotrimoxazole and isoniazid – preventive therapies for people with HIV.

300 conducted in urban areas [33, 35, 36, 41, 44, 45, 49, 58, 67, 68], eleven in rural areas [33,  
301 38, 39, 42, 45, 49, 50, 55, 62, 63, 66] and six in intermediary areas [33, 38, 42, 44, 51, 65]  
302 (i.e. peri-urban, sub-urban, and semi-urban context). Some studies were conducted in  
303 multiple contexts.

304 Patients (n = 24) [31, 32, 35, 36, 38, 43, 44, 46, 48-52, 54, 55, 58-66], health providers (n =  
305 14) [14, 15, 36, 38, 39, 45, 46, 51, 53, 54, 62, 63, 67, 68], and health facilities (n = 14) [15,  
306 33, 36, 37, 39-42, 44, 45, 49, 56, 57, 67] were the study subjects of interest most frequently  
307 represented in this review, with at least one of the three study groups included in thirty-eight  
308 studies (95%). Few studies included other study subjects, explicitly caregivers [15, 34],  
309 community members [38], other stakeholders [14, 45, 46, 56], districts [38], and countries  
310 [47]. Table 1 shows the main characteristics of the studies included in this review.  
311 Additionally, we provided a more detailed presentation of study characteristics separately for  
312 studies on CPT and IPT (S6 Additional file).

## Implementation of cotrimoxazole and isoniazid – preventive therapies for people with HIV.

313 **Table 1. Main characteristics of the studies included in this review.**

| First author [citation] | Year of publication | Country                                                                                                                                                           | Study type                                             | Study subjects                            | Data collection approach                                                                                                     | Treatment of interest |
|-------------------------|---------------------|-------------------------------------------------------------------------------------------------------------------------------------------------------------------|--------------------------------------------------------|-------------------------------------------|------------------------------------------------------------------------------------------------------------------------------|-----------------------|
| Adepoju [43]            | 2020                | Nigeria                                                                                                                                                           | Retrospective cohort study                             | Patients                                  | Record review                                                                                                                | IPT                   |
| Aisu [44]               | 1995                | Uganda                                                                                                                                                            | Operational Assessment                                 | Patients, Facilities                      | Clinic attendance monitoring, Adherence (Pill count), Interviews, Review of key documents                                    | IPT                   |
| Ansa [41]               | 2014                | Ghana                                                                                                                                                             | Comparative research                                   | Facilities                                | Record review                                                                                                                | CPT                   |
| Catalani [45]           | 2014                | Kenya                                                                                                                                                             | Mixed methods assessment                               | Providers, Other stakeholders, Facilities | Key informant interviews, Qualitative field notes of site observations, Interviewer-administered survey, In-depth interviews | IPT                   |
| Chan [33]               | 2014                | Malawi, Uganda, Zimbabwe                                                                                                                                          | Multi-country comparative study                        | Facilities                                | Interviewer administered survey, Record review                                                                               | CPT                   |
| Chang [32]              | 2015                | Uganda                                                                                                                                                            | Randomized trial                                       | Patients                                  | Survey-based assessment                                                                                                      | CPT                   |
| Durovni [46]            | 2010                | Brazil                                                                                                                                                            | Preliminary results of phased cluster randomized trial | Patients, Providers, Other stakeholders   | Trial dataset record review, Interviews, Focus group discussion                                                              | IPT                   |
| Faust [47]              | 2020                | Ethiopia, Nigeria, India, Angola, Brazil, China, DRC, Indonesia, Kenya, Lesotho, Liberia, Mozambique, Myanmar, South Africa, Tanzania, Thailand, Zambia, Zimbabwe | Survey                                                 | Countries                                 | Survey (via email)                                                                                                           | IPT                   |
| Gust [48]               | 2011                | Botswana                                                                                                                                                          | Sub-study of the Botswana IPT prevention trial         | Patients                                  | Interviews, Focus group discussion, Interviewer-administered survey                                                          | IPT                   |
| Horwood [42]            | 2010                | South Africa                                                                                                                                                      | Evaluation/ Cross-sectional descriptive study          | Facilities                                | Record review, Survey-based interviews                                                                                       | CPT                   |
| Huerga [49]             | 2016                | Kenya, Swaziland                                                                                                                                                  | Two prospective cohort studies                         | Patients/ Facilities                      | Record review (cohort study data, clinic registers), Interviews, Observation                                                 | IPT                   |
| Jacobson [50]           | 2017                | South Africa                                                                                                                                                      | Qualitative study                                      | Patients                                  | Semi-structured interviews                                                                                                   | IPT                   |
| Jarrett [51]            | 2019                | South Africa                                                                                                                                                      | Multi-method assessment                                | Providers, Patients                       | In-depth interviews, Record review                                                                                           | IPT                   |
| Kamuhabwa [15]          | 2015                | Tanzania                                                                                                                                                          | Retrospective descriptive study                        | Facilities, Caregivers, Providers         | Record review, Interviewer-administered survey                                                                               | CPT                   |
| Kamuhabwa [36]          | 2016                | Tanzania                                                                                                                                                          | Descriptive cross-sectional study                      | Patients, Providers, Facilities           | Record review, Semi-structured interviews, self-administered questionnaires, Focus group discussion, Facility assessment     | CPT                   |
| Khan [52]               | 2014                | South Africa                                                                                                                                                      | Diagnostic performance evaluation                      | Patients                                  | TB screening questionnaire, Sputum specimens, Chest X-ray, Record review                                                     | IPT                   |
| Lai [53]                | 2019                | Ethiopia                                                                                                                                                          | Cross-sectional study                                  | Providers                                 | Interviewer-administered questionnaires                                                                                      | IPT                   |
| Lester [54]             | 2010                | South Africa                                                                                                                                                      | Qualitative methods study                              | Patients, Providers                       | In-depth interviews, Focus group discussion                                                                                  | IPT                   |
| Little [55]             | 2018                | Malawi                                                                                                                                                            | Sub-study of the                                       | Patients                                  | Adherence (pills)                                                                                                            | IPT                   |

## Implementation of cotrimoxazole and isoniazid – preventive therapies for people with HIV.

| First author [citation] | Year of publication | Country      | Study type                                                                              | Study subjects                                    | Data collection approach                                                             | Treatment of interest |
|-------------------------|---------------------|--------------|-----------------------------------------------------------------------------------------|---------------------------------------------------|--------------------------------------------------------------------------------------|-----------------------|
|                         |                     |              | CHEPETS trial                                                                           |                                                   | dispensed at each visit), Interviewer-administered questionnaires                    |                       |
| Louwagie [37]           | 2012                | South Africa | Historical cohort study                                                                 | Facilities                                        | Record review                                                                        | CPT                   |
| Luyirika [40]           | 2013                | Uganda       | Retrospective case study                                                                | Facilities                                        | Record review                                                                        | CPT                   |
| McRobie [56]            | 2017                | Uganda       | Facility-level policy implementation assessment                                         | Facilities, Other stakeholders                    | Key document review, structured health facility survey, Key informant interviews     | IPT                   |
| Meribe [57]             | 2020                | Nigeria      | Assessment of a provider-focused intervention to increase IPT initiation and completion | Facilities                                        | Review of routinely collected programme data, Health facility quality assessments    | IPT                   |
| Mindachew [58]          | 2011                | Ethiopia     | Analytical cross-sectional study                                                        | Patients                                          | Interviewer-administered structured questionnaires, Adherence (self-report)          | IPT                   |
| Mugomeri [14]           | 2018                | Lesotho      | Qualitative study                                                                       | Providers, Other stakeholders                     | Semi-structured interviews                                                           | CPT, IPT              |
| Mugomeri [59]           | 2019                | Lesotho      | Retrospective cohort study                                                              | Patients                                          | Record review                                                                        | IPT                   |
| Munseri [60]            | 2008                | Tanzania     | Sub-study of the TB vaccine trial                                                       | Patients                                          | Record review, Interviewer-administered questionnaires                               | IPT                   |
| Mwambete [35]           | 2013                | Tanzania     | Serial clinical and cross-sectional resistance study                                    | Patients                                          | Stool collection for resistance profiling, Adherence (self-report)                   | CPT                   |
| Naikoba [39]            | 2017                | Uganda       | Cluster-randomized trial                                                                | Providers, Facilities                             | Practical knowledge/competence assessment, Record review                             | CPT                   |
| Ngamvithayapong [61]    | 1997                | Thailand     | Prospective cohort study                                                                | Patients                                          | Adherence (clinic attendance, pill count), Interviews, Focus group discussion        | IPT                   |
| Okot-Chono [38]         | 2009                | Uganda       | Record review, qualitative study                                                        | Districts, Patients, Providers, Community members | Record review, Focus group discussion, Key informant interviews, In-depth interviews | CPT, IPT              |
| Okwera [31]             | 2015                | Uganda       | Qualitative study                                                                       | Patients                                          | Focus group discussion                                                               | CPT                   |
| Reddy [62]              | 2020                | India        | Mixed-methods study                                                                     | Patients, Providers                               | Review of routinely collected programme data, In-depth interviews                    | IPT                   |
| Rowe [63]               | 2005                | South Africa | Record review, qualitative study                                                        | Patients, Providers                               | Record review, In-depth interviews                                                   | IPT                   |
| Selehelo [64]           | 2019                | South Africa | Qualitative study                                                                       | Patients                                          | In-depth interviews                                                                  | IPT                   |
| Sibanda [34]            | 2015                | Zimbabwe     | Qualitative study                                                                       | Caregivers                                        | In-depth interviews                                                                  | CPT                   |
| Szakacs [65]            | 2006                | South Africa | Adherence assessment, Cross-sectional study                                             | Patients                                          | Adherence (urine-metabolite testing, Interviewer-administered questionnaire)         | IPT                   |
| Tram [66]               | 2019                | Uganda       | Cross-sectional study (sub-study of SEARCH HIV test and treat trial)                    | Patients                                          | Record review, Interviewer-administered survey                                       | IPT                   |
| Van Ginderdeuren [67]   | 2019                | South Africa | Before-and-after study)                                                                 | Facilities, Providers                             | Record review, Structured questionnaire survey                                       | IPT                   |
| Wambiya [68]            | 2018                | Kenya        | Qualitative study                                                                       | Providers                                         | In-depth interviews                                                                  | IPT                   |

314 Abbreviations: CPT- cotrimoxazole preventive therapy; IPT – isoniazid preventive therapy, Providers – Healthcare providers or  
 315 healthcare workers

316



Implementation of cotrimoxazole and isoniazid – preventive therapies for people with HIV.

## 317 **Risk of bias**

318 We assessed the methodological quality of each study individually (S7 Additional  
319 file). First, we identified the categories of study design using the MMAT algorithm and then  
320 appraised each study against the corresponding methodological quality criteria [21]. Among  
321 all studies reporting findings for CPT and IPT, more than half (57%, 50%) applied  
322 quantitative methods [15, 32, 33, 35, 37, 39, 41-44, 47, 52, 53, 55, 57-61, 65-67], followed  
323 by studies that applied a combination of methods (21%, 28%) [36, 38, 40, 45, 46, 48, 49, 51,  
324 56, 62, 63] and those that applied qualitative methods (21%, 18%) [14, 31, 34, 50, 54, 64,  
325 68], for CPT and IPT, respectively. Across all studies that combined quantitative and  
326 qualitative methods, most (80%) presented no methodological attempt to integrate phases,  
327 results, and data from both streams of evidence [36, 38, 40, 46, 48, 51, 56, 63]. Therefore,  
328 nine studies were categorised as multimethod studies [36, 38, 40, 46, 48, 49, 51, 56, 63] and  
329 two as mixed methods studies [45, 62]. According to the MMAT checklist, many included  
330 studies (n = 29) have methodological limitations in at least one of the quality criteria  
331 evaluated. Qualitative studies (including the qualitative component of mixed methods and  
332 multimethod studies) frequently failed to address and justify the qualitative approach applied  
333 (e.g. ethnography, phenomenology) [31, 34, 36, 38, 40, 46, 51, 54, 56, 62, 63]. Quantitative  
334 non-randomized studies frequently failed to address whether the intervention or exposure  
335 occurred during the study period as intended [41, 43, 58-60, 66]. Some studies also missed  
336 to provide reasons why certain eligible individuals chose not to participate [55, 60, 65].  
337 Similarly, the risk of non-response bias was frequently not addressed across quantitative  
338 descriptive studies [15, 35, 42, 47, 57]. Overall, many studies' research question(s) lacked  
339 clarity and focus [32, 35, 38, 45, 56, 59]. We identified seven studies with methodological  
340 limitations in more than two of the quality criteria evaluated [35, 38, 40, 45, 46, 56, 62].  
341 However, to gain a broader understanding of the barriers and facilitators to PT's, we did not  
342 exclude any study from our analysis regardless of the methodological limitations.

Implementation of cotrimoxazole and isoniazid – preventive therapies for people with HIV.

343 Selective reporting of studies and findings in primary research may have introduced a  
344 risk of bias across studies. Similarly, publication bias may have led to a systematic distortion  
345 of our understanding of the phenomenon of interest, solely because specific findings are less  
346 easily accessible or available. Bias introduced through studies or findings that are not  
347 available (e.g. time-lag bias, truncation bias) could not be controlled. To address potential  
348 biases that result from studies being less easily accessible or available, we highlighted the  
349 absence of specific and relevant evidence in the limitation section of this review.

## 350 **Barriers to preventive therapies**

### 351 **Patient and community related barriers**

352 **Adverse reactions**, side effects or undesirable reactions were frequently assessed  
353 in the included studies [14, 15, 31, 34-36, 46, 48, 53, 58, 60-64, 66-68]. Many of these  
354 studies including two that based their findings on IPT trial data [46, 48] either found that both  
355 preventive therapies were generally well tolerated, that the majority of patients had not  
356 experienced any side effects, or both [15, 31, 35, 46, 48, 60, 63, 67]. However, we identified  
357 the following adverse reactions among a minority of patients.

358 Regarding CPT, few patients reported itches and headaches [35], nausea and  
359 vomiting [15, 35, 36], skin lesions or oral wounds [35], skin rashes [31, 35, 36], and  
360 hypersensitivity reactions [15]. Additionally, heartburn, throat dryness, dizziness, fatigue,  
361 appetite loss and numbness were reported by few HIV-positive adults [35]. In rare cases,  
362 severe cutaneous reactions or burning sensations (e.g. Stevens-Johnson syndrome)  
363 required therapy interruption [31, 36]. In this case, some received dapsone as an alternative  
364 therapy for the prevention of opportunistic infections [31].

365 Regarding IPT, few patients reported headaches [46], arthralgia [46, 48], pruritus [46,  
366 64], dizziness or fatigue [48, 62, 64], gastrointestinal disturbances [46, 62, 64], nausea or  
367 appetite loss [48, 60, 62], vomiting [62, 64], weight loss [48] and darker skin complexion [64].

## Implementation of cotrimoxazole and isoniazid – preventive therapies for people with HIV.

368 The most serious, very rarely reported adverse reactions to INH were seizures, psychiatric  
369 symptoms [48, 64], (peripheral) neuropathy [60, 62] and mild to moderate hepatotoxicity [46,  
370 60]. Very few patients experienced adverse reactions that required therapy interruption [48,  
371 60, 63]. After stopping IPT, liver function abnormalities resolved [60].

372 Co-administration of other drugs was believed to have contributed to adverse  
373 reactions [35, 36, 48]. The simultaneous administration of ART, TB treatment and other  
374 drugs (e.g. to treat hypertension, diabetes, asthma) was common among PLHIV [35, 36, 48,  
375 64]. One patient reacted to concurrent CTZ and INH, two weeks after initiating ART [14].  
376 Concurrent use of CTZ and nevirapine may have contributed to rash and leukopenia [36].  
377 Besides, pyridoxine shortages and patients' poor nutritional status were believed to have  
378 contributed to INH-associated neuropathies [62].

379 Our review revealed that side effects influenced patients' and health providers' views,  
380 attitudes and practices regarding the use and prescription of preventive therapies. Some had  
381 heard about side effects and feared experiencing such reactions in the future [31, 34]. Three  
382 studies suggested that fear of potential side effects alone contributed to patients' non-  
383 adherence to IPT [58, 60, 68]. However, seven papers also reported actual or perceived side  
384 effects as the reason for patient-initiated non-completion or lacking adherence to IPT [58,  
385 60-62, 66, 68] and CPT [36]. Tram and colleagues (2019) found that patients who reported  
386 side effects, and those who believed INH was dangerous for their health had lower odds of  
387 completing IPT [66]. Eventually, patients who stopped taking IPT may have discouraged  
388 others from initiating the preventive therapy [68]. For IPT, side effects and contraindications  
389 were also acknowledged by health providers [53, 62, 67]. For example, health providers  
390 interviewed in rural India believed that side effects were an important reason for non-  
391 completion of IPT [62]. Although health providers believed that IPT was important for PLHIV  
392 [53], due to side effects and contraindications (e.g. active liver disease, history of adverse  
393 reactions), sometimes the therapy was not prescribed [53, 67].

## Implementation of cotrimoxazole and isoniazid – preventive therapies for people with HIV.

394            Instead of discontinuing CPT, some patients independently reduced the prescribed  
395 doses as a measure to manage side effects [15, 35, 36]. Parents reported reducing their  
396 infants' doses of CTZ if they were unwell or perceived side effects [15]. Similarly, HIV-  
397 positive pregnant women reported skipping doses of CTZ for the same reason or taking CTZ  
398 at night to cope with perceived side effects [36].

399            **Lacking financial and organisational feasibility** frequently emerged as barrier  
400 theme [15, 34, 38, 44, 46, 48, 50, 54, 58, 60-63, 65]. Evidence synthesis revealed that long  
401 distance to the clinic [44, 60], lacking transport [15, 44], and the with transportation  
402 associated costs [44, 46, 48, 50, 54, 63] routinely comprised an obstacle for patients to  
403 access therapy and care. Women and adolescents were reported to lack control over  
404 economic resources, leaving the decision to attend the clinic with their parents or husbands  
405 [63]. Jacobson et al. (2017) [50] argued that a major barrier to IPT had been patients  
406 entering HIV care. The researchers suggested that once linked to care (i.e. adherent to  
407 ART), the marginal cost for patients to take IPT was low in the South African study setting  
408 [50]. Our review found that frequent stock-outs at public health facilities caused therapy  
409 interruptions among patients who could not afford to buy INH or CTZ at the community  
410 pharmacy [15, 34, 38, 65]. Research from Uganda and Brazil suggested that TB screening  
411 incurred additional costs for patients, including fees for chest radiology, transport for three  
412 consecutive smear checks [46], as well as consultation fees [38]. HIV-positive clinic  
413 attendees in South Africa frequently reported hunger and lack of food security. Lacking food  
414 appeared to be a barrier to IPT because patients believed they could not take the therapy  
415 without food intake [63]. Health providers in Karnataka, India, listed 'lack of social support  
416 and access to social protection schemes' as a reason for patients' non-completion of IPT  
417 [62]. In terms of organisational feasibility, studies from Botswana and South Africa showed  
418 that patients were facing competing priorities, with the need to choose between spending a  
419 full day waiting at the clinic, dedicating the time to their work [48, 50, 54] or addressing other  
420 family members' needs [50, 63]. Studies from Ethiopia, Botswana, Uganda and Thailand

Implementation of cotrimoxazole and isoniazid – preventive therapies for people with HIV.

421 showed that patients did not access treatment or care, when they relocated [48], moved far  
422 away [44] or were seeking work in other provinces [35, 50, 58, 61]. Parents and caregivers  
423 reported lack of a refrigerator at home as challenge for storing paediatric formulations of  
424 CPT [15].

425 **Knowledge gaps and misperceptions** regarding both preventive therapies were  
426 barriers for patients' retention in care, therapy adherence and completion [15, 31, 38, 44, 48,  
427 50, 51, 54, 61-64, 67, 68]. Patients in Uganda thought that CTZ is an analgesic drug, that  
428 concurrent use of CTZ and ART, or TB treatment is contraindicated, and that CTZ was a  
429 treatment for HIV-positive patients [31]. In Tanzania, parents and caregivers reported  
430 difficulties in understanding how to use CPT. They particularly struggled to prepare the CTZ  
431 suspension for their children using crushed tablets when the paediatric formulation was  
432 unavailable [15]. Patients in Thailand thought that INH was prescribed to reduce HIV blood  
433 concentration or prevent AIDS-related complications [61]. Patients in South Africa believed  
434 that INH would alleviate symptoms, leaving asymptomatic patients unconvinced [50]. Three  
435 studies reported that HIV-positive adults were not aware of the desired benefit of IPT in  
436 preventing TB [50, 54, 61], and some patients had never heard of IPT [61]. Not knowing the  
437 benefit, seemed acceptable for some patients, as shown in three studies, which revealed  
438 that patients took IPT without understanding its purpose or duration [50, 61, 64]. However,  
439 most studies suggested that low patient knowledge about IPT is rather harmful for its  
440 implementation [44, 48, 50, 61, 63]. Knowledge gaps can create wrong assumptions,  
441 mislead patients from the appropriate medical advice, or promote seeking information from  
442 other sources [61]. Five studies reported insufficient patient information was a reason for  
443 missing pills, therapy interruptions, or non-compliance to clinic appointments among PLHIV  
444 [44, 48, 50, 61, 63]. Qualitative research conducted in South Africa revealed that some  
445 patients interrupted therapy, thinking they no longer needed IPT when INH refills were  
446 accidentally omitted [50]. This patient belief illustrates that knowledge gaps among PLHIV  
447 also undermine patients' potential to generate demand for IPT [62]. Patients in Uganda and

## Implementation of cotrimoxazole and isoniazid – preventive therapies for people with HIV.

448 South Africa felt better and did not understand the need to return to the clinic, or to take IPT  
449 when they did not have TB, suggesting they lacked understanding of the concept of  
450 prevention [44, 51, 63]. Health providers interviewed in Kenya, South Africa and India also  
451 acknowledged this problem [51, 62, 68]; some patients refused to take ‘TB medicine’ [INH]  
452 without having TB [51, 68]. Others did not value the preventive effect of IPT because of the  
453 low perceived risk of TB and lack of symptoms [62]. Health providers reported that  
454 information materials were lacking or inadequate to educate PLHIV, suggesting there was a  
455 lack of social campaigns, and consensus regarding patient education activities [62, 68].

456 **Patients’ lacking motivation** [15, 44] was identified for both preventive therapies  
457 alongside with a number of explanations [15, 31, 34, 38, 44, 48, 54, 58, 62-64, 68]. Patients  
458 reported they struggled with the need for too many clinic visits, on the one hand, due to a  
459 lack of same-day services [38], on the other hand, due to the long waiting time prior to  
460 receiving services [38], as well as the long preventive therapy duration [58, 68]. Patients  
461 reported they were too busy to take IPT [44, 63] and also struggled with the daily pill burden  
462 [31, 48, 54, 62, 64, 68], which was exacerbated through co-medication [54, 64]. Patients  
463 revealed they received ART, medications for hypertension and diabetes, or asthma in  
464 addition to IPT [64]. Pill burden affected patients adherence, providers believed [62, 68].  
465 Some patients feared adding to the pill burden [62]; others completely declined to take IPT  
466 due to the high number of pills prescribed to PLHIV [68]. Studies from Uganda and South  
467 Africa reported that patients presumed side effects [44], found IPT unnecessary [63] or were  
468 just not interested in taking IPT [44]. Research from Zimbabwe revealed that one mother felt  
469 let down by pharmaceutical interventions and stopped giving CPT after her baby tested HIV-  
470 positive [34].

471 **Forgetfulness** has been frequently reported as a reason for patients’ non-adherence  
472 to preventive therapies [35, 48, 58, 65].

Implementation of cotrimoxazole and isoniazid – preventive therapies for people with HIV.

473           **Patients’ HIV denial, religion and competing medicinal approaches** impeded  
474 patients acceptability of preventive therapies [34, 36, 44, 48, 61, 63, 66]. Patients’ denial of  
475 HIV was a barrier to patients’ retention in care [61], and consequently, their preventive  
476 therapy uptake. Mothers who tested HIV-positive in Zimbabwe associated their diagnosis  
477 with impending death and reported that they preferred to ignore HIV and not give CPT to  
478 their babies when they felt depressed [34]. Non-compliant adult patients interviewed in  
479 Uganda and Thailand were not accepting their HIV status and thus, never returned to the  
480 clinic, or only months later [44, 61]. Research from Uganda suggested that after receiving  
481 their test result patients were still in the process of coping with their HIV diagnosis [44].  
482 Religion and competing medicinal approaches were barriers identified on the sub-Saharan  
483 continent. Three studies suggested an influence of religion as an explanation for HIV denial  
484 [36, 48, 63]. Interviews with HIV-positive pregnant women in Tanzania revealed that people  
485 diagnosed with HIV were encouraged to pray that God will cure their infection, while born-  
486 again Christians were advised to stop taking CTZ [36]. Self-reported reasons for non-  
487 adherence and loss-to-follow up in the Botswana IPT trial also included religious beliefs [48].  
488 In South Africa, a study participant who interrupted IPT reported that members of the church  
489 could not combine clinic medication with church tea. Similarly, people believed it was  
490 prohibited to take clinic medication with traditional medicines [63]. According to Rowe et al.  
491 (2005), HIV was perceived as incurable by western medicine, while traditional healers were  
492 perceived as able to cure HIV, suggesting two competing medicinal approaches [63].  
493 Survey-based research conducted in Uganda found that among non-completers of IPT,  
494 some patients took traditional medicines ‘to prevent becoming sick with TB’ [66].

495           **Stigma and fear of rejection or discrimination** remains a barrier for HIV care and  
496 consequently for the implementation of both preventive therapies [34, 36, 38, 44, 48, 50, 60,  
497 61, 63, 65, 66]. Cotrimoxazole and IPT were linked to HIV [36, 60, 63, 66], which although a  
498 common infection in the countries included in this review, was frequently associated with  
499 stigma and fear of rejection [34, 60, 63] or discrimination [48, 60, 63]. Studies found that

## Implementation of cotrimoxazole and isoniazid – preventive therapies for people with HIV.

500 women feared separation from their spouses and families because of their diagnosis [34,  
501 60]. Although mostly reported by women, in-depth interviews with HIV-positive mothers in  
502 Zimbabwe, suggested that men also feared separation from their wives when testing HIV-  
503 positive [34]. HIV-positive people were laughed at or ridiculed, suggesting a lack of  
504 understanding of HIV within the community [34]. Among men, HIV was perceived as  
505 emasculating [34]. These HIV-positive patients' experiences explain their frequently cited  
506 unwillingness to disclose their HIV status [34, 36, 50, 60, 61, 63]. One study reported that a  
507 woman disguised her HIV medication in a container for headache medication [50]. With the  
508 intention to keep their diagnosis secret, it has been difficult for women to take CPT at their  
509 crowded homes or administer it to their babies [34, 36]. Study participants in northern  
510 Thailand did not allow nurses to visit their homes because they wanted to keep their HIV  
511 status confidential [61].

512         The fact that patients feel the need to keep their HIV status confidential is a concern  
513 because it is likely to contribute to the non-completion of preventive therapy. According to  
514 Tram and colleagues (2019) [66], 'not talking to friends or family about IPT' was associated  
515 with non-completion of IPT' while 'feeling comfortable taking IPT in front of a friend' was an  
516 independent predictor for IPT completion among HIV-positive study participants in rural  
517 Uganda. Lacking privacy and confidentiality at the health facility made it difficult for women  
518 to hide their diagnosis [44]. People attending the overcrowded health facility took the risk of  
519 being seen by their spouses and the community when collecting CTZ prescription refills [34]  
520 or sitting in the open waiting area [38]. Fear of stigma within the household, caused  
521 challenges to therapy adherence [58], whereas perceived at the health facility level, hindered  
522 patients' retention in care [60].

523         **Influence of relatives and friends** may be an important factor for the  
524 implementation of both preventive therapies [31, 34, 36, 44, 48, 60, 62, 63]. Although social  
525 and family support seemed to positively influence some patients' therapy adherence [63],



## Implementation of cotrimoxazole and isoniazid – preventive therapies for people with HIV.

526 compliance with the prescribed therapy regimen was at threat when patients lacked this  
527 support [34, 44, 60, 63, 66]. Sometimes, relatives and friends adversely influenced patients'  
528 compliance with their clinic appointments, retention in care, therapy adherence or  
529 completion. Some patients felt discouraged by their relatives, who disapproved or sabotaged  
530 their treatment adherence [31, 44, 48, 60]. Interviews with HIV-positive adults in Uganda and  
531 Tanzania revealed that some had been discouraged by their spouse or relatives to take IPT  
532 [44, 60]. Similarly, HIV-positive adults in Uganda were advised by their relatives to  
533 discontinue CPT [31]. Interviews with HIV-positive mothers in Zimbabwe suggested that  
534 some husbands opposed CPT. They refused to accept their wife's HIV status and treatment,  
535 as well as the administration of CPT for their baby [34]. Research from Botswana reported  
536 stolen pills, 'the boyfriend threw out the pills', or 'the sister flushed them down the toilet', as  
537 reasons for trial participants discontinuation of IPT [48]. Some wives reported their husbands  
538 stole their CTZ to take themselves [34]. Health providers in Tanzania reported that HIV-  
539 positive pregnant women sometimes discarded CTZ, or shared it with their family members  
540 [36].

541 **Socio-demographic, lifestyle and clinical factors** appeared to influence peoples'  
542 use of IPT (i.e. their chances of initiating, receiving, completing or adhering to IPT) [14, 46,  
543 48, 55, 58-60, 62, 66, 68]. Studies suggested that people's age (being younger) [48, 55, 59,  
544 62, 66], low literacy or educational level [60, 62], their lifestyles [46], including drinking  
545 alcohol [48, 62], negatively influenced patients' use of IPT. With respect to sex, we identified  
546 contrasting findings; five studies suggested that being female was positively associated with  
547 the use of IPT [48, 55, 59, 61, 62], while one study from Tanzania suggested vice versa [60].  
548 Although there was some consensus that younger age was positively associated with the  
549 use of IPT [48, 55, 59, 62, 66], some subgroups lagged behind. In particular, children (and  
550 adolescents) had a lower probability of initiating (or receiving) IPT compared to their adult  
551 counterparts [14, 59, 62]. Pregnant women (unaware of their HIV status) attending antenatal  
552 care services as late as 36 or 38 weeks of pregnancy [14, 48], people aged over 65 [62] and

Implementation of cotrimoxazole and isoniazid – preventive therapies for people with HIV.

553 spouses of PLHIV also lagged behind [14, 62]. A higher education level seemed to improve  
554 the chances of IPT initiation [62] and completion [60]. A mixed-methods study from India  
555 found that compared to those who were illiterate, patients with formal education had a higher  
556 chance of IPT initiation [62]. The authors argued higher IPT completion rates among  
557 participants with education above the secondary level could have been due to patients'  
558 better understanding and comprehension of instructions [60]. Health providers interviewed in  
559 Kenyan cities thought non-adherence was more likely across patients with a poor  
560 immunological and clinical state and patients on second-line ART [68]. Similarly, results of a  
561 retrospective cohort study carried out in Lesotho suggests that patients with WHO clinical  
562 stage 4 were more likely to interrupt IPT than those with clinical stage 1, 2, or 3 [59]. Those  
563 bedridden and with a poor clinical state may be interrupting IPT due to difficulties in reaching  
564 the distant hospital [59].

565 **Concern about the efficacy of CPT** resulted from the steady evolution of antibiotic-  
566 resistant bacteria. Research from Dar es Salaam, Tanzania, attempted to investigate the  
567 incidence of faecal *E. coli* resistance to CTZ among HIV patients through in-vitro resistance  
568 testing and found considerably high antibacterial resistance. The authors concluded  
569 resistance concerns and suggested reconsidering the use of CPT in Tanzania [35]. Our  
570 review also identified factors that may have contributed to the evolution of CTZ-resistant  
571 bacteria. Factors presented by Okwera et al. include poor adherence to CPT and doctors'  
572 loose prescription practices [31]. Besides, the availability of antibiotics without prescription  
573 (in pharmacies, parks, or bus stations) may have promoted resistance to CTZ through  
574 irrational use and self-medication [31, 35]. We did not identify resistance concerns or  
575 scepticism about the continuous efficacy of CPT among health providers.

## 576 **Health provider related barriers**

577 **Shortage of health providers** working at public health facilities emerged as a barrier  
578 for both preventive therapies [14, 36, 38, 43, 45, 46, 51, 56, 62, 64, 67, 68]. However, except

## Implementation of cotrimoxazole and isoniazid – preventive therapies for people with HIV.

579 from one study that referred to CPT [36], all other studies reported staff shortages as an  
580 obstacle for the implementation of IPT [14, 38, 43, 45, 46, 51, 56, 62, 64, 67, 68]. Shortage  
581 of health providers was found in a range of countries including South Africa [51, 64, 67],  
582 Uganda [38, 56], Kenya [45, 68], Tanzania [36], Nigeria [43], Lesotho [14], Brazil [46], and  
583 India [62]. Regarding CPT, Kamuhabwa et al. (2016) [36] reported a shortage of  
584 pharmaceutical personnel at the twenty-six antenatal clinics included in their study in  
585 Tanzania. Regarding IPT, three studies from Uganda and Kenya explicitly stated health  
586 provider shortages with few providers trained in IPT [68] or co-management of TB-HIV [38,  
587 56], and altogether too few health professionals to implement HIV policies [56]. A  
588 disproportional provider-patient ratio was reported, suggesting the number of health  
589 providers did not allow the additional tasks required to deliver IPT [62, 64, 68]. Studies from  
590 Brazil and Kenya, aimed at exploring doctors attitudes to IPT, described doctors' pressure to  
591 see as many patients as possible (i.e. twenty to forty patients per provider before taking  
592 lunch), thus indirectly reported provider shortages [45, 46]. Interviews with HIV and TB  
593 doctors regarding their work, motivation and capacity to implement IPT in HIV clinics in  
594 Brazil, showed that they were too busy, tense and solitary [46]. Although doctors interviewed  
595 in Kenya believed in the importance of IPT for PLHIV, they found it difficult to manage TB  
596 priorities among many other priorities [45]. Two studies from Uganda further advised that  
597 working conditions (i.e. low salaries, heavy workloads) and missing incentives (i.e. career  
598 development prospects) were demotivating for health providers, leading to high staff attrition  
599 and consequently loss of knowledge [38, 56]. Similarly, research from South Africa reported  
600 high staff turnover, which seemed to exacerbate the human resources challenges [67]. To  
601 assess IPT completion rates among HIV-patients and determine predictive factors for IPT  
602 completion, Adepoju and colleagues (2020) [43] carried out a retrospective cohort study that  
603 included HIV-patients from six governmental hospitals in Nigeria. The study reported human  
604 resources challenges in many hospitals and service delivery units. Similarly, a Ministry of

## Implementation of cotrimoxazole and isoniazid – preventive therapies for people with HIV.

605 Health key informant said that staff shortage was a major challenge for implementing IPT in  
606 Lesotho [14].

607 **Knowledge and training gaps** regarding both preventive therapies were identified among  
608 health providers, limiting their ability to make appropriate therapy decisions [14, 36, 38, 39,  
609 42, 44-46, 51, 54, 62, 68].

610 Regarding CPT, knowledge gaps existed among low and mid-level health providers  
611 regarding the co-management of patients with HIV and TB [38, 39], CPT for malaria  
612 prevention among HIV-positive pregnant women [36, 42], and CPT for babies born to HIV-  
613 positive mothers [42]. Kamuhabwa et al. (2016) [36] applied multiple methods to assess CPT  
614 implementation among HIV-infected pregnant women in malaria-endemic Tanzania after the  
615 national policy had been changed from recommending sulfadoxine-pyrimethamine (SP)  
616 intermittent preventive therapy to recommending CPT for malaria prevention in this patient  
617 population. Although health providers perceived the new policy on CPT has been clearly  
618 written and was understandable, they still did not have sufficient knowledge about the  
619 inclusion criteria (HIV serostatus confirmed, time of initiation, no history of allergic reactions  
620 caused by sulfur-containing drugs), and exclusion criteria (skin rashes, Stevens-Johnson  
621 syndrome). The authors concluded that inadequate training was among the factors driving  
622 poor implementation of CPT [36]. Task shifting is an important strategy to strengthen health  
623 provider capacity; however, studies from Tanzania and South Africa have shown that lower  
624 cadre required training to pursue their roles [36, 42]. Lay counsellors in South Africa  
625 admitted they were undertaking tasks outside their scope when providing CTZ to babies [42],  
626 while nurses in Tanzania dispensed medicines, including CTZ, without pharmacy training  
627 [36].

628 Regarding IPT, knowledge gaps existed among HIV providers with various levels of  
629 education, including doctors. Our evidence synthesis suggested that providers were  
630 comfortable managing PLHIV [46], but lacked knowledge about TB [44, 46] and TB

## Implementation of cotrimoxazole and isoniazid – preventive therapies for people with HIV.

631 prevention [14, 45, 46, 51, 54, 62, 68]. Interviews carried out with doctors specialized in HIV  
632 in Brazil reported knowing the ART recommendations, but lacking knowledge about TB  
633 prevention and co-management of (HIV and) TB [46]. One of the ten patients interviewed as  
634 part of a multi-method assessment carried out in South Africa described being incorrectly  
635 denied an IPT prescription; according to the interviewee, the nurse refused to prescribe IPT  
636 because the patient did not have TB, suggesting knowledge gaps among nurses in the study  
637 setting [51]. Other knowledge gaps identified were related to the target groups for IPT [14,  
638 62], IPT duration [51, 68] and the assessment of IPT eligibility [14, 45, 46, 51, 62]. Two  
639 studies revealed a lack of familiarity with IPT prescription requirements for children [14, 62]  
640 and pregnant women [62]. One study found that of the twenty-two providers involved in IPT  
641 prescription, not many knew that specific tablets were available for children (paediatric  
642 dosage) [62]. Lacking clarity was identified about the role of chest x-ray when determining  
643 IPT eligibility [45] and regarding the initiation of IPT without placing a TST [51]. Nurses  
644 pointed out that although the national guidelines instruct them to prescribe IPT even if the  
645 TST is out of stock, the guidelines state that a TST must be placed one month after IPT  
646 initiation. Not knowing what to do if TST remained out of stock after IPT initiation, sometimes  
647 prevented them from prescribing altogether [51]. Additionally, nurses were unsure how IPT  
648 duration varied by patient age, TST result, pregnancy and ART status [51] and about the  
649 period after which IPT should be repeated [14]. Research from South Africa revealed that  
650 doctors lacked knowledge about the IPT guideline and were concerned about the need to  
651 screen for and rule out active TB before initiating IPT [54]. Some health providers had  
652 theoretical knowledge about the IPT recommendations [45, 51], but lacked experience or  
653 familiarity in applying these guidelines in a clinical setting [45, 51, 54]. One nurse reported  
654 she had never used a TST on a patient in her clinic and was unsure whether she could read  
655 the result [51]. Lack of knowledge and familiarity with IPT among providers was explained by  
656 inadequate staff education [14, 38, 45, 62, 68], and minimal follow-up supervision after  
657 training [38]. Criticism was raised regarding the training modules provided to health

## Implementation of cotrimoxazole and isoniazid – preventive therapies for people with HIV.

658 providers because they lacked content on TB-HIV collaborative activities [38], or included  
659 limited or no specific training on IPT [68]. Consequently, providers felt inadequately  
660 equipped to handle emerging challenges associated with IPT implementation [68]. Research  
661 conducted in Lesotho by Mugomeri et al. (2018) [14], suggested that inadequate training has  
662 been the main reason behind delayed IPT initiation in the study setting.

663 **Negative attitudes, concerns and fears** among health providers impeded the  
664 delivery of IPT [14, 44, 45, 53, 54, 62, 64, 67, 68]. Our review revealed that health providers  
665 often had a negative or sceptical attitude toward IPT, for which we found several  
666 explanations [45, 51, 54, 62, 67, 68]. Providers perceived patients' irregular clinic  
667 attendance, non-adherence to IPT and high loss to follow-up as demotivating and  
668 discouraging for IPT initiation. Counselling patients about IPT and encouraging them to  
669 adhere to preventive therapy was perceived as difficult and time-consuming [67]. During in-  
670 depth interviews, nurses working in HIV care in South Africa expressed that patients  
671 misunderstood or were unwilling to cooperate with an IPT prescription. In the absence of  
672 external oversight (e.g. clinical mentorship), nurses would lose their motivation to prescribe  
673 IPT interviews revealed [51]. Other factors that have discouraged providers from prescribing  
674 IPT include discomfort with the long duration of IPT [68], the increasing workload [45, 68],  
675 managing IPT among other priorities, and the influence of fellow health providers [68]. Two  
676 studies reported that negative perceptions or doubts about IPT among some health  
677 providers affected the perception and delivery of IPT by their fellow providers [54, 68].

678 Although evidence strongly recommends concomitant use of IPT with ART, research  
679 from Lesotho suggests a general perception that HIV patients who are on ART for a long  
680 time have a low-risk of developing TB. For this reason, providers mostly prescribed IPT to  
681 patients newly diagnosed with HIV [14]. We also identified contrasting perceptions about the  
682 effectiveness of IPT. Research from Lesotho stated that health providers perceived IPT was  
683 effectively reducing TB disease among patients with HIV [14]. Meanwhile, a study from

## Implementation of cotrimoxazole and isoniazid – preventive therapies for people with HIV.

684 South Africa reported health providers were unconvinced about the benefits of IPT [54].  
685 Concerning was that consequently, health providers omitted to prescribe IPT in the South  
686 African setting. Qualitative research carried out by Lester and colleagues (2010) [54] aimed  
687 to explore patients' and providers' attitudes toward IPT. The study found that none of the  
688 twenty HIV-patients interviewed had heard of IPT and doctors were either unaware of the  
689 efficacy of IPT in preventing TB or believed the evidence was equivocal. Clinic staff and  
690 doctors admitted that IPT was not part of routine practice (such as CPT); the authors  
691 concluded that in this setting barriers to IPT were predominantly derived from health  
692 providers [54].

693 Health providers' concerns and fears were related to active TB [14, 44, 64, 67, 68], antibiotic  
694 resistance [45, 54, 64, 68] and side effects [14, 53, 68]. In the first place, health providers  
695 were concerned about their ability to exclude active TB based on TB symptom screening.  
696 Providers who worked in a setting where no TST was available believed that applying the  
697 screening algorithm alone was insufficient to rule out TB [67, 68]. Atypical clinical  
698 presentations complicated TB screening of patients coinfecting with TB-HIV [54], and  
699 occasionally, HIV-patients developed TB disease during [44, 64] or after the course of IPT  
700 [14, 44, 64]. Drug resistance was another concern of health providers which led to  
701 scepticism about IPT [45, 54, 68]. Bacterial resistance to INH was believed to result from  
702 providers' failure to rule out TB [64], periodic and long-term drug stock-outs [45], patients'  
703 non-adherence to IPT [68] and the use of IPT in settings with a high prevalence of multi-drug  
704 and extremely drug-resistant TB [54]. First, failure to rule out TB was revealed by Selehelo,  
705 Makhado and Madiba (2020) who reported that health providers sometimes prescribed IPT  
706 without symptom screening [64]. Their qualitative study applied in-depth interviews with HIV-  
707 patients to explore their experiences regarding IPT provision and derive strategies to  
708 improve IPT uptake in community health centres in South Africa. Patients interviewed  
709 reported that symptom screening for active TB was not done before the provision of IPT and  
710 that they developed TB while on IPT, regardless of reporting symptoms to the nurses [64].

## Implementation of cotrimoxazole and isoniazid – preventive therapies for people with HIV.

711 Second, health providers working in selected clinics in Kenya reported they were concerned  
712 about contributing to drug resistance by exposing patients to IPT when INH stock-outs did  
713 not permit therapy completion. If they were not confident all their eligible patients had 9-  
714 months IPT supply providers preferred not to initiate IPT [45]. Third, health providers  
715 interviewed in urban HIV clinics in Kenya expressed their concern that patients non-  
716 adherence would lead to the development of resistant, multi-drug resistant or extensively  
717 drug-resistant TB [68]. Fourth, health providers interviewed in South Africa expressed such  
718 fear of inducing multi-drug resistance through INH monotherapy that some suggested  
719 starting empirical courses of full treatment for TB. Providers believed a combination of drugs  
720 was safer and offered greater benefit than INH monotherapy [54]. Eventually, some  
721 providers feared that INH could induce side effects [14, 53, 68]. Overall, the fears and  
722 concerns described made health providers feel uncomfortable or unwilling to prescribe IPT.

723 **Provider-patient communication** emerged as a barrier to the implementation of  
724 IPT. Our review revealed that patients were often afraid to speak to health providers about  
725 IPT, suggesting ineffective provider communication and a lack of trust in the health provider-  
726 patient relationship [50, 51, 58]. Jacobson and colleagues (2017) [50] explored patients'  
727 reasons for default from IPT through individual interviews. IPT defaulters stated that they  
728 avoided reporting side effects, questioning missing medications, or requesting to re-start IPT  
729 after treatment lapses, due to their fear of nurses scolding [50]. Research from Ethiopia  
730 found that patients lacked advice from doctors, feared side effects and stigma [58]. The  
731 authors concluded lack of provider-patient communication contributed to patients non-  
732 adherence to IPT [58]. Similarly, HIV-patients interviewed in South Africa revealed that they  
733 felt intimidated during their conversation with nurses; nearly half of them reported that nurses  
734 were sometimes rude and that this discouraged them to ask about IPT [51].



Implementation of cotrimoxazole and isoniazid – preventive therapies for people with HIV.

## 735 **Clinical information related barriers**

736 **Inaccurate recording and lacking integration of health records emerged as a**  
737 barrier for both preventive therapies [14, 36-38, 42, 45, 51, 63, 67]. Although poor recording  
738 of clinical information on patients' records was frequently reported [14, 37, 38, 42, 45, 67],  
739 our review revealed that incomplete records did not necessarily imply that services have not  
740 been provided [14, 37, 42, 45]. Horwood et al. (2010) interviewed HIV-positive mothers in  
741 South Africa, regarding the health services and interventions their babies had received, and  
742 compared this information with data recorded on the post-natal ward- and child health  
743 records [42]. According to the mothers, significantly more babies had received CPT,  
744 compared to what has been recorded on their health records [42]. Similarly, Lougwagie et al.  
745 (2012) [37] reviewed altogether over two-thousand patient records from separate and semi-  
746 integrated health facilities. Their study showed that CPT was less well recorded than  
747 counselling and HIV testing, raising the question whether this was due to poor recording or  
748 poor provision of the preventive therapy [37]. Van Ginderdeuren and colleagues (2019) [67]  
749 obtained a similar pattern of results for IPT. Their record review showed a discrepancy  
750 between what has been recorded by health providers in IPT registers and what patients had  
751 received according to pharmacy records. The authors concluded underreporting of IPT in  
752 routine IPT registers [67]. In line with this finding, Mugomeri et al. (2018) [14] suggested  
753 underreporting of monthly statistics through the paper-based record system.

754 However, we identified weaknesses related to the health information systems  
755 available to record patient data, contributing to inaccurate recording practices. First, health  
756 information systems in many TB/ HIV high burden countries were paper-based or relied on a  
757 mix of paper-based and electronic records [14, 45]. Research from Uganda described  
758 recording tools were poorly designed and unpractical; HIV registers lacked data entry  
759 sections regarding TB-HIV collaborative services, and TB information were only recorded on  
760 patients' chronic care cards [38]. Similarly, Jarrett et al. (2019) [51] reported that patient

## Implementation of cotrimoxazole and isoniazid – preventive therapies for people with HIV.

761 charts were disorganised and lacked a specific log for IPT registration, making it challenging  
762 to track each patient's progress toward IPT completion. Most nurses discontinued IPT to  
763 avoid the possibility of prescribing IPT past the intended duration, a study from South Africa  
764 revealed [51]. Providers relied on a patchwork of documents completed by various team  
765 members in a Kenyan study setting where patients did not see the same provider during  
766 each visit [45]. The study reported that health providers frequently suffered from missing  
767 patient data. In case patient data were missing, patient self-report was used to determine the  
768 steps of TB diagnosis and IPT eligibility assessment previously completed. Doctors reported  
769 they trusted patient recall over electronic medical record (EMR) data when patient  
770 information conflicted [45].

771 Our review revealed that lacking integration of patient data recorded from different  
772 service units bears two risks. First, documentation of patient data in separate patient files  
773 (e.g. HIV registers, patients' chronic care card, laboratory-, pharmacy records) affected  
774 service delivery efficiency by multiplying the time spent for document retrieval, data entry,  
775 and in some cases the provision of services that had already been provided [38, 45].  
776 Second, in the context of TB-HIV co-infection, poor recording, communication and lacking  
777 service integration [36, 63] may lead to preventable drug interactions or adverse reactions. A  
778 study from Tanzania reported that eight HIV-positive pregnant women were co-administered  
779 both SP and CPT for malaria prevention, which is contraindicated because of increased risk  
780 of severe cutaneous reactions [36]. Research from South Africa reported that four patients  
781 whose clinical records suggested they were not eligible for IPT, had started the course [63].

782 **Ineffective monitoring, evaluation and surveillance** emerged as a second barrier  
783 related to clinical information [14, 38, 56, 67]. Both concepts, monitoring and evaluation  
784 (M&E) and surveillance require collecting data, that are analysed, and finally transformed  
785 into strategic information that governments and leaders use to make informed decisions. We  
786 identified weaknesses of the health information system and found that patient data recorded

## Implementation of cotrimoxazole and isoniazid – preventive therapies for people with HIV.

787 at the health facility level were commonly inaccurate or lost [14, 45]. The detection and  
788 notification of health events (surveillance) and reporting of routine programme data (M&E)  
789 consequently leaked in its foundation.

790 In 2009, research from Uganda reported that no tools existed for routine recording  
791 and reporting of TB-HIV surveillance data that permitted informing planning processes [38].  
792 Eight years later, McRobbie et al. (2017) [56] reported that there were still no regional or  
793 national information systems in place, that allowed the integration and submission of health  
794 facility data in Uganda. Different views about obstacles for M&E in Lesotho were particularly  
795 well described by Mugomeri et al. (2018) [14]. Through interviews with key informants, the  
796 qualitative study found that major barriers to the implementation of IPT included ineffective  
797 health information systems [14]. The representative of the WHO country office in Lesotho  
798 warned that the IPT indicator system was paper-based and that data reported by health  
799 facilities were inaccurate. One health provider acknowledged that the total number of  
800 patients enrolled in IPT was unknown due to a shortage of paper registers [14]. The provider  
801 added that monthly reports were sent to the MoH for congregate analysis, but feedback was  
802 rarely received at the health facility level. The investigators confronted the responsible  
803 ministry of health (MoH) representative who explained that it was not feasible to frequently  
804 assess the effectiveness of their programmes and that their primary goal was to increase  
805 IPT uptake. Providers were concerned that INH could induce side effects; some believed  
806 that poor M&E resulted in the late detection of these undesirable reactions [14]. A partner  
807 organization representative acknowledged the need for more resources, including stationary  
808 and patient registers, and noted that failure to monitor patient referral, additionally  
809 confounded monthly statistics [14]. A study from South Africa showed that IPT indicator data  
810 were not comparable due to inconsistent denominators across health facilities. Some  
811 facilities routinely collected data to measure IPT uptake among all PLHIV and others used  
812 HIV-patients newly enrolled in HIV care as denominator [67]. Weaknesses identified by  
813 Okot-Chono et al. (2009) [38] included that the existing supervisory visits carried out by

Implementation of cotrimoxazole and isoniazid – preventive therapies for people with HIV.

814 national and district officers for monitoring of the TB-HIV collaborative activities were  
815 infrequent and had not been performed jointly by the TB and HIV programmes.

## 816 **Pharmaceutical management related barriers**

817 **Drug stock-outs or shortages** were common for both preventive therapies [14, 15,  
818 33, 34, 36, 38, 45, 50, 51, 56-58, 62, 64, 65, 67, 68]. Except from one study that reported  
819 stock-outs in India [62], all other studies reported stock issues in countries located in sub-  
820 Saharan Africa. African countries included Kenya [45, 68], South Africa [50, 51, 64, 65, 67],  
821 Uganda [38, 56], Tanzania [15, 36], Zimbabwe [34], Nigeria [57], and Lesotho [14].

822 Inconsistent drug supply, periodic and long-term stock-outs, or shortages of CTZ [14,  
823 15, 33, 34, 36, 38] and INH [14, 45, 50, 51, 56, 57, 62, 64, 65, 67, 68] were obtained from  
824 record reviews, reported by patients, health providers, representatives of MoH or partner  
825 organizations. It may be noteworthy, that stock-outs were also reported for dapsone, an  
826 alternative drug to CTZ [14] and pyridoxine, a drug prescribed to prevent peripheral  
827 neuropathy caused by INH [14, 62]. Our review revealed consequences of and reasons for  
828 the inconsistent availability of CTZ and INH.

829 Stock-outs of INH hindered therapy initiation [45, 56, 62], therapy adherence [64, 65]  
830 and completion [62]. Interviews with doctors in Kenya showed that providers remained  
831 hesitant to initiate IPT due to frequent pharmacy shortages [45]. Providers in Kenya  
832 perceived stock-outs of INH and other supplies related to IPT as a major impediment to  
833 effective implementation and acceptance of the therapy. Some providers felt the poor supply  
834 of INH showed a lack of support for the IPT programme among policy-makers and  
835 management. This, in turn, negatively affected their perception, morale and delivery of IPT  
836 [68]. HIV patients interviewed in South Africa, reported medication stock-outs as the reason  
837 for defaulting or not adhering to IPT [50, 65]. In-depth interviews with HIV-patients in South  
838 Africa revealed that patients perceived the occasional unavailability of INH as inconvenient

## Implementation of cotrimoxazole and isoniazid – preventive therapies for people with HIV.

839 and frustrating because it increased clinic visits and may lead to non-adherence [64]. One  
840 study suggested that the location from which PLHIV collected their drug supply may have  
841 predicted adherence to IPT, as peripheral pharmacies ran out of INH more frequently than  
842 hospital pharmacies [65].

843 For CTZ, the included evidence suggested that drug shortages led to irregular uptake  
844 of CPT [38], dose alterations among infants [15, 34], and patients skipping scheduled clinic  
845 visits [36]. Stock-outs of CTZ at health facilities and HIV clinics were reported as the reason  
846 why many children had missed one or more doses of CPT [14] and why only a few TB/HIV  
847 co-infected patients received CPT regularly [38]. Studies from Tanzania and Zimbabwe  
848 found that frequent shortages of the paediatric formulation at health facilities caused  
849 challenges to caregivers and providers [15, 34]. In Tanzania, parents had difficulties  
850 understanding how to crush tablets and prepare suspensions for their infants [15]. Lack of  
851 CTZ at the health facilities was suggested as a reason for pregnant women skipping visits  
852 scheduled at the antenatal clinics [36].

853 Among explanations to why health facilities and pharmacies frequently ran out of  
854 CTZ, we found an increasing number of HIV patients [38], inaccurate recording [36],  
855 challenges with quantification and forecasting of the prescribed preventive therapy [36, 38].  
856 At the health facility level, we identified the late submission of health facility requisitions [38]  
857 or ordering of drug quantities that did not cover the facility demand [36]. Outside the health  
858 facility level, we found district-wide stock-outs of INH [51] and scarcity of CTZ at the medical  
859 stores department or government supplier side [15]. A lack of support from policymakers,  
860 programme management [14] or district health departments to adequately supply the lower  
861 level units with medicines was also believed to facilitate stock-outs [38, 68]. A district health  
862 officer interviewed in Uganda reported that it was not surprising that CTZ was not available  
863 at the health facilities. Health offices failed to support lower-level health providers with  
864 correctly quantifying drugs in stock and calculate drug consumption [38]. Ineffective supply

Implementation of cotrimoxazole and isoniazid – preventive therapies for people with HIV.

865 chain management [13, 35, 63, 65] and logistical challenges [58] provided alternative  
866 explanations for frequent stock-outs. Finally, an uncoordinated implementation of IPT shown  
867 by Meribe et al. (2020) [57] also led to long-term INH stock-outs. Their study reported a  
868 strong focus on IPT at the beginning of the implementation process in Nigeria, which led to  
869 the utilization of all stock at most sites, followed by national level stock-outs that lasted from  
870 December 2018 to April 2019 [57].

871 **Lack of pharmaceutical personnel** emerged for both preventive therapies [36, 56].  
872 Studies reported that sites in Uganda lacked a dedicated logistics manager [56] and that  
873 health facilities lacked pharmacy personnel in Tanzania, where nurses without  
874 pharmaceutical training dispensed medicines [36]. **Lack of written instructions** was  
875 reported by Kamuhabwa et al. [36] referring to missing documented strategies for ensuring  
876 the availability of CTZ at the health facilities on one hand, and missing written instructions  
877 clarifying how medicines should be administered by patients at home on the other hand. The  
878 authors suggested the need to provide patients with a list of known potential adverse  
879 reactions, including those that require to stop taking the therapy [36].

## 880 **Service delivery related barriers**

881 **Sub-optimal service delivery** emerged as a critical barrier for the implementation of  
882 both preventive therapies. We identified examples of sub-optimal service delivery in fourteen  
883 studies that reported from a large range of countries with a high burden of TB and HIV [15,  
884 34, 37, 38, 42-44, 46, 50, 51, 56, 62, 64, 68]. These examples primarily showed that service  
885 delivery was time-consuming, the patient was not put at the centre of care and that health  
886 services delivery was inefficient.

887 Service lapses, limited working days, and doctors' limited working hours have been  
888 reported at public health facilities [44, 50]. A study from Uganda found that the AIDS  
889 information Centre was closed when patients returned the first time after testing HIV-

## Implementation of cotrimoxazole and isoniazid – preventive therapies for people with HIV.

890 positive; they never returned thereafter [44]. Studies reported that patients faced long  
891 queues, spending hours waiting before receiving services or their medications [34, 38, 50,  
892 64]. Jacobson et al. (2017) [50] reported that HIV patients endured long queues to collect  
893 their medicines, often skipping meals and taking medications on an empty stomach [50].  
894 Dispense of IPT and ART in separate lines [50] and the lacking synchronization of IPT with  
895 other HIV clinic appointments [43] added to patients' waiting time and clinic visits. A  
896 qualitative study explored women's ability to maintain their babies on CPT. The study found  
897 that mothers typically had to dedicate the entire day to one clinic visit, which they found  
898 difficult, considering they also had to attend the clinic for their own HIV care [34]. Due to lack  
899 of same-day services, one family had to spend multiple days at the clinic for HIV care [34,  
900 38], providing a possible explanation why only a few HIV-positive mothers in South Africa  
901 reported attending regular follow-up for their own care [34], and why patients felt  
902 discouraged. Overall, services delivery did not appear patient-friendly and routinely tested  
903 patients' willingness and ability to receive HIV care [44]. Other examples of sub-optimal  
904 service delivery showed weaknesses in the quality of healthcare provided.

905 Patient information, including tolerance to preventive therapy, side effects, drug  
906 interactions, and therapy adherence, were frequently missing on patient records [14, 64, 66].  
907 Some HIV-patients reported that their test results got lost at the health facility [50]. Interviews  
908 revealed that HIV-positive mothers had received insufficient quantities of CTZ, lasting for  
909 forty days, while their next clinic appointment was two months away [34]. Often, there was  
910 no follow-up of HIV-patients who missed clinic appointments [15].

911 Among the potential underlying causes of sub-optimal service delivery, the disproportional  
912 provider-patient ratio was the most prominent. Human resource constraints presented a  
913 critical operational challenge to HIV services delivery [56, 62, 64]. As a result of MoH funding  
914 constraints (and differing donor priorities), there were too few providers available to provide  
915 necessary services [56]. It may be noteworthy that since the scale-up of HIV testing and

## Implementation of cotrimoxazole and isoniazid – preventive therapies for people with HIV.

916 ART followed by the universal treatment policy released in 2015, there has been an ever-  
917 increasing number of PLHIV requiring continuous treatment and care. So far, the majority of  
918 HIV services have been delivered at the health facility level, resulting in organisational and  
919 operational challenges to handle the heavy patient load [15, 38, 40, 56, 62, 64]. For IPT, the  
920 high patient load was believed to prevent nurses from screening every patient for IPT  
921 eligibility [51]. Among other factors, IPT service delivery was believed to be greatly affected  
922 by lack of integration between HIV and TB services [46], the inconsistent INH drug supply  
923 [51, 62, 68] and inadequate records for IPT registration [51].

924 **Inadequate facility infrastructure** emerged as barrier theme for both preventive  
925 therapies [15, 38, 56]. Health facilities in Tanzania lacked weighing scales to determine  
926 infants' weight for CTZ doses calculation. Thus, providers based the doses on age rather  
927 than weight, unable to ensure infants received the correct amount of preventive therapy [15].  
928 Facility infrastructure has been reported as inadequate to ensure patients' privacy and  
929 confidentiality; lacking counselling rooms and inadequate space to implement the HIV  
930 policies was reported [38, 56]. Research from Uganda suggested that an outside waiting  
931 area for HIV services attendees may raise suspicion among husbands seeing their wives  
932 there seated, suspecting that she may have contracted HIV [38].

933 **Poor integration of preventive therapy-related services** was another important cross-  
934 cutting barrier theme [14, 33, 36, 38, 42, 46, 50, 54, 56, 68] that arose from the segregated  
935 delivery of health services in many high TB/HIV burden countries. Studies showed that  
936 preventive therapies were frequently not part of the services provided at the health facility  
937 [33, 42, 56]. Not all primary care facilities in Malawi and Uganda offered CPT for patients  
938 with HIV on-site [33]. Only half of the immunization clinics in a South African study setting  
939 provided CPT for HIV-exposed babies [42]. None of the twenty-four health facilities, included  
940 in a study carried out in Uganda, offered IPT as service for patients with HIV [56]. Likewise,  
941 research showed that additional testing services required before initiating IPT were also



## Implementation of cotrimoxazole and isoniazid – preventive therapies for people with HIV.

942 frequently not available on-site [54, 68], which meant that for receiving preventive therapies,  
943 patients had to attend other health facilities as well.

944 Overall, preventive therapy was poorly integrated with other speciality services [36, 38, 46,  
945 50, 54, 68], often requiring patient referral between health facilities and incurring additional  
946 patient costs [38, 68]. However, inter-clinic referral was reported to be weak [14, 38], added  
947 to patients' costs [68] and challenged service quality [54]. In Kenya's capital HIV clinics,  
948 most clinical examinations required before IPT initiation were carried out in separate  
949 departments [68]. According to a study that was carried out in South Africa, only one of ten  
950 clinics had onsite chest radiography, while none could test sputum on-site. Investigations for  
951 TB performed off-site lacked coordination between TB and HIV shown in lost specimen and  
952 laboratories not communicating TB test results with HIV sites. Lacking coordination between  
953 TB and HIV sites was believed to hinder patients' initiation of IPT [54]. Poor inter-clinic  
954 referral and separate clinic days for TB and HIV services were reported in Uganda,  
955 demonstrating poor integration of IPT with HIV care [38]. Interviews with key informants in  
956 Lesotho suggested that confirmation of patients' arrival at the referred centre was often  
957 lacking [14]. Wambiya and colleagues (2018) [68] interviewed eighteen health providers in  
958 urban Kenya to explore factors that influenced providers' acceptability of IPT. The study  
959 reported that most clinical examinations were conducted in separate departments at  
960 additional costs. Health providers urged that all testing services should be provided at the  
961 same site. Costs incurred by additional exams should be subsidised to increase IPT uptake,  
962 providers argued [68]. The need to refer patients to another facility for preventive therapy,  
963 not only added to patients' waiting time and transport costs, it has shown to carry service  
964 delivery related risks, such as dual administration of intermittent treatment for malaria  
965 prevention in HIV-positive pregnant women. A study identified patients in Tanzania who  
966 received both, SP at the antenatal care unit, and CPT at the Prevention of Mother To Child  
967 Transmission (PMTCT) unit [36]. Research from Uganda reported that few TB patients were  
968 tested for HIV, not identifying co-infected patients eligible for CPT [38]. In South Africa,

## Implementation of cotrimoxazole and isoniazid – preventive therapies for people with HIV.

969 efforts have been made to integrate IPT-related services with ART services at the same  
970 location. However, interviews with HIV-patients from four primary care health facilities and  
971 one district hospital revealed that IPT and ART were dispensed in different queues and that  
972 most facilities had not fully integrated TB and HIV services on-site [50].

973 **Patient loss to follow-up** was identified for both preventive therapies [42, 48, 55,  
974 56, 62, 63, 67], referring to patients not linked to care (after HIV diagnosis) and those who  
975 stopped attending clinic appointments. Mc Robie and colleagues (2017) [56] argued that  
976 recent efforts in Uganda had focused on HIV testing and immediate ART provision without  
977 strengthening health facility infrastructure and human resources accordingly to allow the  
978 implementation of the complete set of HIV care policies. Consequently, systems failed to  
979 maintain patients in care downstream in the care cascade, the authors concluded [56].  
980 Besides difficulties to retain patients in care, engaging those reluctant to present for HIV  
981 services (i.e. testing, care and support) from the beginning, also remained a challenge for  
982 HIV service delivery [63].

983 A sub-study of the Botswana IPT trial explored self-reported reasons for trial  
984 participants' loss to follow-up (LTFU) following IPT initiation. Reasons included patients'  
985 financial and organisational feasibility to attend the clinic appointments, lacking motivation or  
986 social support. Stigma, relocation, religious beliefs, and pregnancy also comprised reasons  
987 for patients to stop preventive therapy, while some believed they had completed the study  
988 [48]. We identified another example showing patients' loss to follow-up due to lack of linkage  
989 to care, which can turn into a lost opportunity to provide CPT, as shown in a study from  
990 South Africa. Coverage of PMTCT interventions was high during pregnancy and delivery, but  
991 mothers and HIV-exposed infants were poorly linked to follow-up care after the baby was  
992 born. The provision of CPT was also poorly recorded on the child health records. Follow-up  
993 care (e.g. CPT and HIV testing of the new-born) therefore depended on the mother  
994 reminding the health provider that their baby has been HIV-exposed. Less than half of the

Implementation of cotrimoxazole and isoniazid – preventive therapies for people with HIV.

995 eligible babies had a PCR test and initiated CPT at their first visit to the immunization clinic  
996 [42]. Research suggests that patients' non-completion of IPT was frequently associated with  
997 failure to return to the clinic for follow-up of IPT [55, 62]. Recent efforts have focused on  
998 assigning health providers responsible for contacting these patients via telephone or in-  
999 person. However, providers perceived that following-up of these patients was difficult and  
1000 time-consuming [67].

1001 **Ruling out TB disease** has been reported as a major barrier to implementing [14,  
1002 38, 45-47, 49-54, 62, 64, 67, 68]. Due to the need to rule out TB disease before therapy  
1003 initiation and during the course of IPT, delivery of IPT has been perceived as difficult [53].  
1004 Since 2011, WHO recommends using a simple algorithm to identify PLHIV unlikely to have  
1005 active TB, no longer requiring other tests in countries where other tests are not available  
1006 [13]. However, some countries continued using other recommended tools to determine  
1007 patients' eligibility for IPT. According to a recent email survey [47], three different TB  
1008 screening tools were used for PLHIV in high TB/HIV burden countries. Besides symptom-  
1009 based TB screening (Kenya, Lesotho, Liberia, Myanmar, Nigeria, South Africa, Tanzania),  
1010 tuberculin skin tests (Brazil, Ethiopia, Indonesia and Thailand) and interferon-gamma release  
1011 assays (Ethiopia) have been used. Several countries reported combining screening tools  
1012 (Brazil, Ethiopia, Indonesia, Kenya and Thailand). For example, Brazil reported using a  
1013 combination of tuberculin skin tests (TST) and chest radiography, while Kenya reported a  
1014 combination of symptom-based screening and radiography [47]. Evidence synthesis  
1015 revealed several limitations for each screening tool.

1016 First, weaknesses of TST were frequently associated with the tuberculin (purified  
1017 protein derivate) required to carry out the test. We identified shortage of purified protein  
1018 derivate (PPD), delayed or insufficient supply from the manufacturers [47], challenges of  
1019 ensuring the quality of PPD [47, 49], as well as the limited utility of TST in settings where  
1020 BCG vaccination continued [47]. One study aimed to assess the acceptability and

## Implementation of cotrimoxazole and isoniazid – preventive therapies for people with HIV.

1021 operational feasibility of TST in urban Kenya and rural Swaziland [49]. The study revealed  
1022 that some health providers initially confused tuberculin with BCG vaccine. In both settings,  
1023 some patients received an inappropriate amount (half-dose) of tuberculin injection. In rural  
1024 Swaziland, cold chain monitoring issues were experienced [49]. Besides, the need for a  
1025 second visit for TST reading was a major concern among patients and providers, implying  
1026 additional time and transport costs [49, 67]. A questionnaire survey designed to identify  
1027 barriers to IPT was administered to health providers in South Africa [67]. Survey findings  
1028 showed that health providers had no time to perform TST; they found the TST reading time  
1029 consuming and struggled to motivate patients to return for the reading [67]. Research from  
1030 Brazil reported an alarmingly long time between the first clinic visit to IPT initiation. The time  
1031 delay was explained by the fact that TST was not routinely offered in all clinics on all days  
1032 and the chain of processes involved in TST. Once an asymptomatic patient received a  
1033 positive TST result, chest radiography was required to rule out TB, for which the patient  
1034 received a prescription. The patient then needed to schedule an imaging appointment before  
1035 returning to the clinic to present the result to the doctor. Adding to the delays involved in the  
1036 process of TST testing, patients may not have felt the urgency to quickly return to the clinic  
1037 because they did not feel sick, the authors argued [46]. A review of patient records from five  
1038 primary care health facilities revealed that only the facility that opted against TST reported a  
1039 significant increase in IPT uptake [67]. Overall, the reported findings suggest that TST may  
1040 have contributed to the low uptake of IPT [46, 47, 67]. At the time of our review, TST had  
1041 been removed from most high burden countries' IPT policies. However, some countries,  
1042 including Brazil, continued to apply TST as a necessary screening component [47].  
1043 Proponents of TST argued that providing IPT only for those with latent TB infection (after  
1044 careful exclusion of active TB) would avoid unnecessarily treating a significant number of  
1045 patients that do not stand to benefit [49].

1046           Second, more recently developed interferon-gamma release assays (IGRAs) address  
1047 important limitations of TST. Patients are only required to visit the clinic once for blood

## Implementation of cotrimoxazole and isoniazid – preventive therapies for people with HIV.

1048 collection and the result is available within one day. Additionally, prior BCG vaccination does  
1049 not cause a false-positive IGRA test result. However, due to a lack of budget, lab  
1050 infrastructure and trained personnel, and insufficient capacity for specimen transport, these  
1051 relatively expensive tests have hardly been used in TB/HIV high burden countries [47].

1052 Third, symptom-based TB screening refers to a simple algorithm applied prior to  
1053 initiating IPT and at every follow-up visit, thus allowing health providers to interrupt  
1054 preventive therapy in case a patient develops symptoms of TB. Those who do not report any  
1055 symptoms of current cough, fever, weight loss, or night sweats are unlikely to have active  
1056 TB. If no contraindications to IPT exist, these patients should be offered preventive therapy  
1057 [13]. Although symptom-based screening has significantly advanced IPT uptake in low-  
1058 resource settings [53], we identified challenges associated with this approach.

1059 Challenges included doubts about the reliability of TB symptom screening among  
1060 patients with HIV and TB-HIV, lacking provider capacity to routinely screen TB symptoms,  
1061 and service delivery inefficiencies. Solely based on TB symptom screening, health providers  
1062 found it difficult to rule out active TB [53] or decide whether a patient had active or latent TB  
1063 [68]. Some providers believed that using the screening algorithm alone was insufficient to  
1064 rule out TB [54, 67, 68]. Opponents of symptom-based screening argued that atypical clinical  
1065 presentations complicated TB screening of patients coinfecting with TB-HIV who frequently  
1066 suffered from extrapulmonary TB [54]. Khan et al. (2014) carried out a diagnostic  
1067 performance evaluation among HIV patients in South Africa [52]. Study findings suggested  
1068 that symptom-based screening was very sensitive and diagnostically useful among patients  
1069 not on ART, however, less reliable among patients on ART [52]. The high patient load was  
1070 believed to prevent providers from screening every HIV-patient for IPT eligibility [38, 51].  
1071 During interviews conducted in South Africa, nurses repeatedly stated that staff shortages  
1072 and the large patient burden prevented them from screening every HIV patient [51].  
1073 Research revealed possible consequences of providers' lacking capacity to screen patients

## Implementation of cotrimoxazole and isoniazid – preventive therapies for people with HIV.

1074 for TB. Health providers either lose their motivation to prescribe IPT [51] or continue  
1075 prescribing IPT without TB symptom screening [64, 67]. The latter was shown by Selehelo et  
1076 al. (2019) [64]. The authors reported providers were prescribing IPT without screening for TB  
1077 symptoms, which meant risking a delay of TB treatment and favouring the emergence of  
1078 drug resistance [64]. We identified service delivery issues with symptom-based screening  
1079 that delayed IPT initiation. Research from Lesotho [14] suggested that ineffective TB  
1080 screening was due to an inefficient service delivery system. Delays in IPT initiation have  
1081 been reported for patients with presumptive TB, indicating it took much time until TB was  
1082 ruled out. The study also found that IPT was mainly initiated among patients newly  
1083 diagnosed with HIV, while IPT uptake among patients enrolled on ART before IPT was  
1084 launched in 2011 lagged behind [14]. Health providers interviewed in India reported that  
1085 proxy attendance delayed IPT initiation. In the mainly rural study setting, patients often send  
1086 their caregivers or other attenders to collect their ART refill, making it impossible for  
1087 providers to assess patients' eligibility for IPT [62]. In Kenya, a combination of TB symptom  
1088 screening and obligatory chest radiography was applied to determine HIV-patients' IPT  
1089 eligibility [45, 47]. Doctors reported they were unsure about the steps to take to determine  
1090 IPT eligibility. However, doubts were mostly related to the role of chest x-rays, when and if it  
1091 should be ordered and how to read the radiographs [45]. Irrespective of the screening tool  
1092 applied in each country, suspects of TB required additional investigation.

1093 **Investigation of TB suspects** is a crucial requirement for all patients with a positive  
1094 TB screening result [13]. For those who developed TB during the course of IPT, additionally,  
1095 drug susceptibility testing should be performed [52]. However, we identified several  
1096 challenges associated with evaluating patients with presumptive and confirmed TB [14, 38,  
1097 45, 49, 52, 54, 64, 67]. Diagnostic equipment needed to investigate TB included chest  
1098 radiography [54], laboratory equipped for the analysis of sputum samples [45] and the  
1099 identification of resistant TB strains [52]. However, the capacity to diagnose TB was limited  
1100 in high TB/HIV burden countries, where most health facilities could not diagnose TB on-site

Implementation of cotrimoxazole and isoniazid – preventive therapies for people with HIV.

1101 [52, 54]. Although the more accurate GeneXpert® test allows rapid diagnosis and  
1102 identification of patients with drug-resistant TB, this expensive molecular test technology was  
1103 often only available at centralised sites, reserved for a subset of complex cases [14, 45].  
1104 Besides, our review revealed knowledge gaps among health providers related to co-  
1105 management of TB-HIV [38] and their diagnostic competences [38, 45]. In Kenya, doctors  
1106 specialised in HIV reported they were unsure how to read a chest radiograph [45]. Providers  
1107 in Uganda reported struggling with the assessment of smear-negative and extra-pulmonary  
1108 TB [38]. Most concerning was the study finding that only a minority of PLHIV with self-  
1109 reported symptoms were investigated for TB [49, 67], causing TB treatment delays [64] or  
1110 resulting in too many patients denied for IPT [49].

## 1111 **Health system financing related barriers**

1112 **Health system funding issues** were identified for both preventive therapies [14, 15,  
1113 47, 56]. Many high TB/HIV burden countries historically depended on funding for HIV and TB  
1114 from international donors and governments. Many will continue to require donor backing to  
1115 improve the provision of a comprehensive care package to PLHIV [56].

1116 Lacking funds to purchase essential medicines (as which CTZ and INH are classified), has  
1117 been reported in a Tanzanian study setting [15]. The quantitative descriptive study involved  
1118 questionnaire-based interviews with health providers, who suggested lack of funds to  
1119 purchase essential medicines at the health facility level had been an attributing factor for  
1120 drug scarcity at public hospitals [15]. Similarly, qualitative research from Lesotho reported  
1121 that among the main challenges for implementing IPT were interrupted supply chains caused  
1122 by insufficient health system funding [14]. Through interviews with MoH key informants,  
1123 health providers and representatives of partner organisations, the study found that additional  
1124 resources were needed to sustain a seamless supply of drugs and reagents. A health  
1125 provider reported that health facilities frequently ran out of CTZ, pyridoxine, and dapsone,  
1126 among other drugs. Ministry of health officials expressed the need for health system funding

Implementation of cotrimoxazole and isoniazid – preventive therapies for people with HIV.

1127 to be increased to improve the sustainability of HIV/ TB programmes, including IPT [14]. A  
1128 recent email survey carried out by Faust et al. (2020) [47] aimed to identify challenges  
1129 experienced in countries with a high burden of TB regarding the implementation of latent TB  
1130 infection policies. Respondents from six high TB/HIV burden countries (i.e. Ethiopia, Liberia,  
1131 Nigeria, South Africa, Tanzania, Zimbabwe) reported that guidelines existed, but due to  
1132 financial barriers guidelines were not fully implemented [47].

1133 **Vertical funding** emerged as barrier theme for both preventive therapies [14, 38,  
1134 56], referring to a stand-alone programme approach (e.g. HIV programme, TB programme)  
1135 used in many resource-constrained countries for health system funding, typically associated  
1136 with vertical governance and health service delivery. However, health system strengthening  
1137 and the integrated provision of interventions that go beyond a single disease programme are  
1138 not characteristic for vertical funding. Both preventive therapies are good examples for  
1139 interventions that require some degree of collaboration between disease programmes (i.e.  
1140 HIV, TB, PMTCT, child health) to ensure their successful implementation. Lacking funds for  
1141 implementing TB/HIV collaborative activities in Uganda was reported on a national TB/HIV  
1142 programme level and district level [38, 56]. Policymakers reported international donor  
1143 dependency of the HIV programme [56]. Implementers and researchers interviewed about  
1144 HIV policy implementation in Uganda reported misalignment of goals between the  
1145 government and donors in determining priorities, suggesting lacking donor support for health  
1146 systems strengthening and prevention activities [56]. Donors were considered to focus more  
1147 on the provision of ART [56], while human resources constraints presented a critical  
1148 operational challenge for providing HIV services, including IPT [14, 56]. However, funding of  
1149 human resources primarily rested with the individual Ministry of Health [14, 56].

## 1150 **Leadership & governance related barriers**

1151 **Issues regarding policies and guidelines** emerged for both preventive therapies  
1152 [14, 15, 38, 47, 51, 54, 67, 68]; however, were most commonly reported for IPT. A recent



## Implementation of cotrimoxazole and isoniazid – preventive therapies for people with HIV.

1153 survey [47] suggested that guidelines on latent TB infection (LTBI) did not exist in several  
1154 high TB/HIV high burden countries (Angola, China, DRC, India, Indonesia, Kenya, Myanmar)  
1155 [47]. Barriers to guideline implementation reported among these countries included  
1156 prioritization of active TB over LTBI management (Angola, China, DRC, India, Kenya),  
1157 financial barriers to programme implementation (Angola, DRC, Kenya), lack of programme  
1158 staff (DRC) as well as guideline development still in progress (India, Indonesia, Kenya,  
1159 Myanmar). The study suggested that in China, PLHIV were not targeted for LTBI treatment.  
1160 However, the evidence relied not only on National TB programme staff but also on  
1161 researchers and health officials. Findings, therefore, reflect the respondents' current  
1162 knowledge and not necessarily the official situation in their respective countries [47].

1163 Preventive therapy guidelines were not always accessible [15, 38] and  
1164 understandable for health providers [14, 15, 38, 51, 68]. Health providers in Tanzania  
1165 reported no up-to-date guidelines were available at the health facility, hindering effective  
1166 implementation of CPT for children born to HIV-positive mothers [15]. In Uganda, district  
1167 officers had received policy guidelines on TB/HIV collaborative services but had not  
1168 disseminated the documents to providers and communities [38]. In Kenya, South Africa and  
1169 Lesotho, national guidelines for IPT were described as unclear [14, 68], ambiguous,  
1170 confusing, and incomplete [51]. Lesotho's guideline was reported to lack clarity about the  
1171 duration after which IPT should be repeated. Health providers noted that they were left with  
1172 too much flexibility regarding the timing of IPT initiation. Some providers initiated ART before  
1173 IPT to allow unmasking side effects of ART and ensure patients are stable. Others  
1174 prescribed IPT only two weeks after ART initiation. This flexibility in the guidelines was  
1175 believed to have contributed to the poor implementation of IPT [14]. Research from Kenya  
1176 suggested that lacking clarity of IPT guidelines meant that providers struggled to implement  
1177 IPT effectively. According to health providers from three HIV clinics in Nairobi, Kenya,  
1178 particularly unclear were eligibility criteria and the duration of IPT, as well as how to decide  
1179 whether a patient had active or latent TB [68]. Lacking clarity might have contributed to

## Implementation of cotrimoxazole and isoniazid – preventive therapies for people with HIV.

1180 health providers' low fidelity to the IPT guideline in South Africa [54, 67]. Van Ginderdeuren  
1181 et al. (2019) [67] reported that across selected primary care health facilities, TST was not  
1182 implemented as intended, symptomatic patients were not investigated for TB, and IPT  
1183 initiation rate was generally low. Others have shown that, only in one out of ten sites  
1184 included in their study, health providers prescribed according to the existing policy guideline.  
1185 Providers seemed to lack clarity regarding the eligibility criteria for IPT. For example, some  
1186 thought that IPT was indicated for patients with a CD4 count below 200 cells per microlitre,  
1187 or reserved for patients on ART [54].

1188 **Lacking leadership and coordination** emerged for both preventive therapies [14,  
1189 38, 42, 46, 50, 51, 68]. Both interventions require some degree of collaboration between  
1190 disease programmes (i.e. HIV, TB, PMTCT, maternal and child health) to ensure their  
1191 successful implementation. However, weak leadership and coordination at the strategic and  
1192 operational level have been reported as a major challenge for TB/HIV collaborative activities  
1193 [38, 46, 68]. Studies showed that TB and HIV services' responsibilities remained fragmented  
1194 [46, 50] with lacking clarity concerning roles and responsibilities for collaborative service  
1195 delivery at the health facility level [38, 42]. Research from Uganda found that it was not clear  
1196 in the Ugandan study setting whether the responsibility for coordination belonged to TB or  
1197 HIV health providers. With the exception of two health facilities, no coordination meetings  
1198 had been held between the two programmes [38]. Mugomeri et al. (2018) [14] suggested  
1199 that lack of leadership was among the major barriers to scaling-up IPT for PLHIV in Lesotho.  
1200 Research carried out in two KwaZulu-Natal districts showed that PMTCT services were  
1201 poorly integrated with maternal and child health services. Interviews with nurses and lay  
1202 counsellors revealed a lack of clarity regarding their roles and responsibilities in the provision  
1203 of CPT for HIV exposed babies [42].

1204 **Lacking top-down policy support and management issues** emerged as barriers  
1205 for both preventive therapies [38, 50, 51, 68]. On an institutional and policy level, we

## Implementation of cotrimoxazole and isoniazid – preventive therapies for people with HIV.

1206 identified a lack of commitment, support and oversight as barriers to implementing IPT  
1207 policies and collaborative TB/HIV activities. Providers interviewed in Kenya felt demotivated  
1208 by the limited commitment at the policy level in ensuring effective implementation and  
1209 streamlining of the IPT programme [68]. After investigating patients' reasons for defaulting  
1210 IPT, Jacobson et al. (2017) [50] concluded that long queues, drug stock-outs, and a lack of  
1211 service integration require attention on an institutional and policy level. At the health facility  
1212 level, 'no-one was overseeing' the implementation of TB/HIV collaborative services,  
1213 participants of a study conducted in Uganda reported. Inadequate joint supervision may lead  
1214 to providers' poor performance, the authors suggested [38]. Similarly, in South Africa, nurses  
1215 admitted that in the absence of external oversight, they would lose their motivation to  
1216 prescribe IPT [51]. The multimethod study carried out by Jarett et al. (2019) [51] involved  
1217 interviews with health providers after they had received a nurse-centred intervention. The  
1218 intervention was designed to promote two target behaviours: checking IPT-eligibility for all  
1219 PLHIV and prescribing IPT to this target population. The authors concluded that without  
1220 adequate oversight, complicated guidelines would continue to hinder the implementation of  
1221 IPT.

1222 **Inadequate planning** was identified as a barrier to the implementation of IPT and  
1223 TB-HIV collaborative activities [14, 38]. Inadequate national planning was reported as an  
1224 important barrier to IPT implementation in Lesotho, key informants said. Representatives of  
1225 partner organizations reported that IPT was affected by lack of foresight at the planning  
1226 stage and poor capacity to solve problems that arise [14]. Multimethod research from  
1227 Uganda revealed that out of five districts implementing TB-HIV collaborative activities, only  
1228 one had incorporated collaborative activities into its district work plan. The remaining four  
1229 districts had separate HIV and TB plans that excluded TB-HIV joint activities. Another barrier  
1230 to TB-HIV collaborative activities reported by the authors was that patients and communities  
1231 were not involved in the planning process [38].

Implementation of cotrimoxazole and isoniazid – preventive therapies for people with HIV.

1232           **Lacking stakeholder engagement** emerged as a barrier theme for both preventive  
1233 therapies, suggesting that community consultation and engagement of implementers and the  
1234 population targeted for preventive therapies were insufficient, which may have hindered the  
1235 scale-up of preventive therapies [14, 38, 68]. According to research from Uganda,  
1236 community-related activities were planned without community involvement. Additionally, the  
1237 study reported a lack of information flow from health facilities to the communities concerning  
1238 the TB and TB-HIV services available [38]. The limited engagement of health providers in  
1239 the development of the IPT guideline provided one explanation for their low acceptability of  
1240 IPT in Kenya [68]. Health providers interviewed in Nairobi's selected HIV clinics reported  
1241 they were told: "Here are the guidelines to be followed!". Providers felt they should have  
1242 been involved in the process of guideline development [68]. Similarly, lacking engagement of  
1243 the people responsible for implementing IPT (i.e. health providers) was reported to inhibit  
1244 IPT uptake in Lesotho [14].

## 1245 **Metasummary**

1246           We summarised the identified barrier themes in tables and compared both preventive  
1247 therapies with respect to similarities and differences of barriers (S8 Additional file). Overall,  
1248 thirty-two barrier themes emerged from the comprehensive barrier description of which the  
1249 majority were cross-cutting barrier themes (n = 25). We also identified seven intervention-  
1250 specific themes.

1251           Barrier themes specific to CPT (n = 2) were 'concerns about the efficacy of CPT' in  
1252 areas of high bacterial resistance [31, 35] and a 'lack of written instructions' (i.e. procedures  
1253 to ensure the availability of CTZ and patient information) [36]. Barrier themes specifically  
1254 identified for IPT (n = 5) include 'patients' socio-demographic, lifestyle and clinical factors'  
1255 [14, 46, 48, 55, 59-62, 66, 68], 'providers' attitudes, beliefs & fears to induce INH resistance'  
1256 [14, 44, 45, 51, 53, 54, 62, 64, 67, 68] and challenges related to 'provider-patient  
1257 communication' [50, 51, 58]. Additionally, we identified issues with 'ruling out TB disease'

## Implementation of cotrimoxazole and isoniazid – preventive therapies for people with HIV.

1258 [14, 38, 45-47, 49-54, 62, 64, 67, 68] and ‘the investigation of TB suspects’ as intervention-  
1259 specific barriers for IPT.

1260           After carefully grouping each barrier to the health system component from which it  
1261 arose, we compared both preventive therapies with respect to similarities and differences of  
1262 health system components most frequently associated with barriers. We found that barriers  
1263 to both preventive treatments were most frequently related to ‘health service delivery’ and  
1264 ‘patients & their community’. For IPT, health provider related barriers seemed to play an  
1265 additional important role, third most frequently referred to. In contrast, barriers to CPT, were  
1266 third most frequently related to ‘pharmaceutical management’. ‘Financing’ was among the  
1267 health system components least frequently associated with barriers to either of the  
1268 preventive therapies. We applied an innovative mapping technique to summarise the  
1269 comprehensive barrier information. The resulting metasummary graphics illustrate all  
1270 identified weaknesses (i.e. barrier themes) within each of the seven health system  
1271 components, together with the number of papers that contributed information to each barrier  
1272 theme. Therefore, mapping allows visual comparison of barrier themes identified for CPT  
1273 (Fig 3) and IPT (Fig 4).

## Implementation of cotrimoxazole and isoniazid – preventive therapies for people with HIV.

1274 **Fig 3. Metasummary: Barriers to cotrimoxazole preventive therapy for people living with HIV.** The graphic presents all main barrier themes identified in countries with a  
1275 high burden of tuberculosis and HIV, assigned to the health system component from which the barrier theme arose, considering a seven component health system framework  
1276 (modification of the WHO Framework for Action, 2010). Barrier themes identified in more than or equal to ten papers are presented with an exclamation mark. Numbers in  
1277 brackets display the number of supporting papers. Total number of peer-reviewed papers included with barriers to cotrimoxazole in this review (N= 11).

1278 **Fig 4. Metasummary: Barriers to isoniazid preventive therapy for people living with HIV.** The graphic presents all main barrier themes identified in countries with a high  
1279 burden of tuberculosis and HIV, assigned to the health system component from which the barrier theme arose, considering a seven component health system framework  
1280 (modification of the WHO Framework for Action, 2010). Barrier themes identified in more than or equal to ten papers are presented with an exclamation mark. Numbers in  
1281 brackets display the number of supporting papers. Total number of peer-reviewed papers included with barriers to isoniazid in this review (N= 28).

Implementation of cotrimoxazole and isoniazid – preventive therapies for people with HIV.

## 1282 **Facilitators for the implementation of preventive therapies**

1283 We identified a set of strategies for enhancing the health facility-based  
1284 implementation of preventive therapies for PLHIV. We presented our findings, according to  
1285 the preventive therapy cascade - a coding framework that we developed a priori (Fig 5).

### 1286 **Fig 5. The preventive therapy cascade.**

1287 TB - tuberculosis; HIV - human immunodeficiency virus; PLHIV- people living with HIV; IPT- isoniazid preventive  
1288 therapy; CPT - cotrimoxazole preventive therapy.  
1289

1290 The preventive therapy cascade outlines the steps that PLHIV repeatedly go through  
1291 from having access to appropriate healthcare to completing preventive therapy. We  
1292 developed this conceptual framework to promote stakeholder discussion about the ‘weak  
1293 spots’ within the cascade in their specific setting. We listed the identified facilitators for the  
1294 implementation of both preventive therapies accordingly. Therefore, this approach allows  
1295 stakeholders (1) to select steps within the cascade that require attention, (2) to rapidly  
1296 screen potential strategies that address these ‘weak spots’ within the cascade and (3)  
1297 collaboratively choose a combination of strategies that are most appropriate in their specific  
1298 context. For example, strategies to enhance patients’ adherence to PT’s are presented in  
1299 section F6, shown in Fig 5. and Table 2.

1300 **Table 2. List of facilitators for the implementation of CPT and IPT.**

## Implementation of cotrimoxazole and isoniazid – preventive therapies for people with HIV.

F1 Access: Strategies for health system strengthening, improving access to and quality of health care

### Leadership & governance

- Increase the number of health care facilities (especially in rural areas) [48, 60].
- Decentralised provision of preventive therapies (PT's) and related services:
  - at health centres rather than just hospitals [53, 62], at the community level (e.g. mobile radiology units) [45].
  - home-based care for selected patient groups (i.e. HIV+ pregnant women) [32, 36].
- Raising community knowledge & awareness about HIV & PT's (via education campaigns, health talks, initiatives [34, 64, 68]):
  - to reduce stigma, peoples' fears and misperceptions (e.g. reduce the 'emasculating' stigma of HIV through education messages that emphasise how treatment after testing HIV+ can help a man achieve his 'manly' roles by maintaining his health, allowing him to 'provide for the family') [34, 64].
  - to sensitise communities about HIV testing and CPT's benefits (e.g. malaria prevention during pregnancy, prevention of opportunistic infections among babies born to HIV+ mothers) [34].
  - to increase knowledge regarding the importance of IPT, its benefits and the purpose of taking it [64, 68].
  - consider incorporating IPT into the training curriculum of undergraduate students [64].
- Encourage companies to support employee health to reduce stigma at the workplace [34].
- Strong commitment and strategic implementation support from policymakers and health authorities [67, 68]:
  - National advocacy for IPT [68].
  - Stakeholder engagement: involving policymakers, higher level supervisors and health providers in the development of policies & guidelines, in the planning of resources for monitoring, the supervision and evaluation of outcomes particularly needed for the effective implementation of IPT [68].
  - Planning for policy implementation: according to the target dimension (e.g. piloting, large scale roll-out) and ensuring additional resources depending on the complexity of the intervention (e.g. CPT<IPT) [56].
- Monitoring & Evaluation (M&E) of the implementation [56]:
  - Clearly defined, standardised indicators to evaluate the implementation progress (i.e. IPT programme) [67].
  - Decentralised responsibility of M&E (e.g. long term external oversight from district level management) [51].
  - Need for (informatic) tools and skills for routine tracking of data (e.g. initiation, coverage) [59].
  - Sharing summary data with higher-level health authorities (district team, provincial team, MoH) [59].
  - Need for a well-defined feedback mechanism of reporting indicators [68].
  - Reflecting on results, adapting the implementation process if necessary [56].
- Ensuring national and regional policies exist on:
  - Stigma reduction strategies at the patient and community level (e.g. education about HIV, TB and the concept of prevention through teaching in schools, mass media, lectures on the radio, TV, skill building for potential perpetrators of stigma, involving peers) [34].
  - Strict policies for providers on patient confidentiality and supportive service provision [63].
  - HIV service integration (with TB care, family-, well-child- & maternal health care) [34, 37, 38, 40, 44, 46, 50].
  - Assessment of patients migration, travelling and relocation intentions and directions on how providers should proceed (e.g. clinic transfer, therapy prescription of >2months in advance) [50, 61].
  - Defining HIV service delivery strategy for vulnerable groups (i.e. commercial sex workers) [58].
  - Financial relief for PLHIV (subsidised transport to the clinic, free consultation, free treatment) [62, 63].
  - Social security benefits (e.g. disability grants for HIV/ AIDS, child support for caregivers of HIV+ children, nutritional support, food-partnerships with farmers, gardening or sustainable nutrition programmes) [63].
  - IPT policy modification and adequate dissemination [54].

### Consider Policy update for IPT

- Considering (local, regional, national) lessons learnt for policy development of IPT delivery strategies [46, 63]
  - to identify specific target groups for scaling-up IPT (e.g. children and adolescents with HIV) [55, 59]
- Involving health providers in the development of the IPT guidelines to promote their agreement with IPT [68]
- Define set of minimum criteria to be met for IPT enrolment, such as:
  - Acceptance of HIV diagnosis [50] or openness about HIV status [63].
  - Adherent to other intensive treatment regimen (e.g. ART) [50, 63].
  - Regular clinic attendance (e.g. for at least 3 months or 4 visits) [63].
  - Counselling for patients newly diagnosed, or not yet on ART, before IPT initiation [50].
  - Requirement to attend support groups or linking HIV+ patients to community tracing [63].
- Allowing more time for patients to accept their HIV diagnosis before enrolment in intensive treatment regimen [61, 63].
- Simplifying and clarifying IPT policy [14, 51, 54, 67]:
  - Eligibility criteria; How to rule out active TB [54], role of chest radiography [54].
  - Consider using the WHO symptom screening algorithm (TST, chest radiography not mandatory) [47, 67].
  - Necessity to provide IPT together with pyridoxine [68]; monthly versus 3-monthly INH drug refills [68].
  - Health provider considerations before initiating IPT (e.g. clinical state, concurrent drug regimen) [68].



## Implementation of cotrimoxazole and isoniazid – preventive therapies for people with HIV.

### Strengthen clinical information systems

- Allocate resources to data collection, data recording and data management (e.g. data clerks, stationery items) [14, 45].
- Update and ensure the distribution of tools (paper-based or electronic) to record IPT and patient information [45].
  - Paper-based IPT monitoring tool (that allows recording patients' TB screening information prior to and upon IPT completion, side effects, documenting last drug pickup, refill periods [57].
  - Mobile application developed by WHO or adapting the app to local needs to improve recording of IPT [62].
  - Ensure tools allow efficient recording of patient information (e.g. integrated ART/ IPT registers and prescription forms) [14, 57], patient tracing between clinics and patient loss to follow-up [56].
  - Ideally one file held per patient in semi-integrated/ integrated facilities [37, 38].
- Improve reporting accuracy [67]:
  - Clearly written instructions to guide providers in recording of clinical data [42].
  - Conducting periodic surveys of patient cards to ensure the quality of routine recording [38].
- Consider the implementation of an electronic medical record (EMR) system if the following minimum system requirements are met: adequate data quality, reliable electricity, hardware & supplies, functional printers [45].
- Monitoring of risks (i.e. adverse reactions, drug interactions) and benefits of PT's [46, 50, 63].
- Monitoring of antimicrobial resistance [35, 52].

### Pharmaceutical management

- Consider the authorisation of shorter TB preventive therapy regimen recommended by WHO [67, 68].
- Consider the use of ART/INH combination therapy in one tablet [64] or combined pre-packaging of ART and INH [43].
- Strengthen central procurement & supply chain management; Empower district TB office to procure INH locally [62].
- Consider authorising dispense of INH at referral centres closer to patients' homes [62].
- Considering potential peaks of INH demand (1. during scale-up, 2. when patients turn eligible for a repeat course) [57].

### Service delivery considerations

- Patient-centred approach [66]:
  - Facilitate good and trusting health provider-patient relationship [50, 61, 63].
  - Ensuring patients' confidentiality (e.g. avoiding different queues or consultation rooms for HIV services at the health centre [64], or deliver HIV services separate from the general outpatient facility [34, 63].
- Empowering patients through knowledge and education [34, 48, 59, 63, 64]:
  - General information: living healthy with HIV, the concept of prevention and that PT is taken when asymptomatic [50]. TB risk and TB prevention [31, 36, 46].
  - Information about CPT [31]: Benefits - prescribed for preventing infections or 'to strengthen patients with low immunity', discouraging self-medication and pill sharing [35], importance of taking the correct drug amount, adherence to CPT during the prescribed duration [35], CPT can be used concurrently with ART and TB treatment [31], safety of CPT and potential side effects, side effects that require interruption of CPT, and that there is an alternative medicine (dapsone) [31].
  - Information about IPT [44, 46, 50, 58, 65]: Benefits, e.g. prescribed for preventing TB and not to alleviate symptoms [50, 67], importance of IPT [60], adherence to IPT, correct administration and duration of IPT [50], concurrent use with other treatments (e.g. ART), potential side effects (some treatable with pyridoxine), side effects requiring therapy interruption [50], encouraging reporting of side effects or complaints [50]
- Consider alternative approaches to deliver PT's:
  - TB/HIV service integration (requires close relationship between TB and HIV programmes, political will and considerable routine planning, coordination and monetary efforts [38, 44, 46, 55, 68].
  - 'Directly observed therapy' (DOT) approach for IPT [64].
  - Pharmacists delivering IPT (i.e. TB symptom screening, patient education, prescription and follow-up) [43].
- Develop patient education materials and ensure their distribution and availability at the health facilities [31].
- Consider establishing an initiative that engages patients' cultural, religious and spiritual beliefs (e.g. engage traditional healers to work alongside health providers in the clinic environment) [8].

### Health system financing

- Financial commitment of Ministry of Health & donors [56] to fund HIV response [56], TB/HIV service collaboration [54].
- Additional funds needed for employment of health providers [14, 56], commodities and lab facilities [56].

### Strengthen health provider capacity and knowledge

- Additional employment & shifting tasks to lower cadre to scale up HIV care and PT [15, 32, 38, 41-44].
  - Ensuring a reasonable patient-provider ratio [51], hiring personnel dedicated to IPT related activities [68].
  - Involving nurses [41], lay counsellors [42], pharmacists [43], social- and community workers [44], as well as PLHIV [32, 38] (i.e. peers, expert patients) to provide psychological support, PT, basic tasks, dispense tablets.
- Ensuring provider training & refresher training [14, 15, 36, 38, 42, 44, 46, 51, 53, 54, 66].
- Improving the working conditions of health providers (e.g. work environment, reduce provider workload) [67, 68].

## Implementation of cotrimoxazole and isoniazid – preventive therapies for people with HIV.

|    |                                                                                                                                                                                                                                                                                                                                                                                                                                                                                                                                                                                                                                                                                                                                                                                                                                                                                                                                                                                                                                                                                                                                                                                                                                                                                                                                                                                                                                                                                                                                                                                                                                                                                                                                                                                                                                                                                                                                                                                                                                                                                                                                                                                                                                                                                                                                                                                                                                                                                                                                                                                                                                                                                                                                                                                                                                                                                                                                                                                                                                                                                                                                                                                                                |
|----|----------------------------------------------------------------------------------------------------------------------------------------------------------------------------------------------------------------------------------------------------------------------------------------------------------------------------------------------------------------------------------------------------------------------------------------------------------------------------------------------------------------------------------------------------------------------------------------------------------------------------------------------------------------------------------------------------------------------------------------------------------------------------------------------------------------------------------------------------------------------------------------------------------------------------------------------------------------------------------------------------------------------------------------------------------------------------------------------------------------------------------------------------------------------------------------------------------------------------------------------------------------------------------------------------------------------------------------------------------------------------------------------------------------------------------------------------------------------------------------------------------------------------------------------------------------------------------------------------------------------------------------------------------------------------------------------------------------------------------------------------------------------------------------------------------------------------------------------------------------------------------------------------------------------------------------------------------------------------------------------------------------------------------------------------------------------------------------------------------------------------------------------------------------------------------------------------------------------------------------------------------------------------------------------------------------------------------------------------------------------------------------------------------------------------------------------------------------------------------------------------------------------------------------------------------------------------------------------------------------------------------------------------------------------------------------------------------------------------------------------------------------------------------------------------------------------------------------------------------------------------------------------------------------------------------------------------------------------------------------------------------------------------------------------------------------------------------------------------------------------------------------------------------------------------------------------------------------|
| F2 | <p>Entry to health facility: Strategies to enhance patients' willingness and feasibility to enter public healthcare</p> <ul style="list-style-type: none"> <li>• Welcoming and safe clinic environment, friendly and supportive health providers [63, 66].</li> <li>• Making visits brief &amp; convenient (i.e. offering all services on all clinic days, adding weekend clinic hours) [46, 48].</li> <li>• Ensuring patients' confidentiality to reduce the fear of stigma/ discrimination [34, 42, 63].</li> <li>• Encouragement &amp; advice from peers (post -test club, support groups) [44, 63].</li> <li>• No clinic consultation fees; no dispensing fees for patients with chronic diseases (i.e. HIV) [38, 63].</li> <li>• Building incentives into service delivery (e.g. subsidized transport/ reimbursement, nutritional support) [60, 61, 63, 65].</li> <li>• Family &amp; community support and encouragement (emotional, financial, organisational support) [34, 50, 63].</li> <li>• Consider integrating alternative medicine, church services, and family counselling into public health care if western medicine is not widely accepted (i.e. opposed by family, friends, church leaders, traditional medicine) [63].</li> <li>• Providing patient information during pre-and post-test counselling [34, 44, 50, 60] or every clinic visit [36].</li> </ul>                                                                                                                                                                                                                                                                                                                                                                                                                                                                                                                                                                                                                                                                                                                                                                                                                                                                                                                                                                                                                                                                                                                                                                                                                                                                                                                                                                                                                                                                                                                                                                                                                                                                                                                                                                                                                                |
| F3 | <p>Eligibility: Strategies to increase health providers willingness and capability to determine patients' eligibility for PT's</p> <ul style="list-style-type: none"> <li>• Empowering providers through training [14, 36, 38, 42, 44, 46, 51, 53, 54, 57, 62, 63, 66-68]: <ul style="list-style-type: none"> <li>General information: <ul style="list-style-type: none"> <li>- current epidemiology of HIV &amp; TB [46, 53] and TB/HIV collaborative service provision [38].</li> <li>- clinical particularities of TB/HIV co-infection [46], managing complex cases [39].</li> <li>- current policies and guidelines regarding the treatment of latent TB, TB and HIV [51].</li> <li>- public health importance of detecting and treating active TB among patients with HIV [46].</li> <li>- How to facilitate nutritional support and social security grants [63].</li> <li>- Communication skills (facilitating a good and trusting provider-patient relationship) [66].</li> </ul> </li> <li>Information on CPT: <ul style="list-style-type: none"> <li>- CPT for HIV+ pregnant women [15, 36] and HIV-exposed babies [15].</li> </ul> </li> <li>Information on IPT: <ul style="list-style-type: none"> <li>- Benefits of IPT [67], importance of IPT/ treating latent TB among patients with HIV [46, 51].</li> <li>- Present current research consensus supporting IPT [46], showing IPT does not promote INH resistance [54].</li> <li>- How to rule out TB and determine if patients are eligible for IPT.</li> <li>- Increase providers' confidence [53], capability [67] and motivation to prescribe IPT [67].</li> <li>- Managing side effects and supporting patients to complete IPT [66].</li> <li>- Difference between tuberculin and BCG vaccine (if applicable) and monitoring the tuberculin cold chain [49]</li> </ul> </li> </ul> </li> <li>• Measures to improve health providers' acceptability of IPT [68], their confidence and motivation to prescribe IPT: <ul style="list-style-type: none"> <li>- Mentorship [51, 53, 57, 64], supportive supervision [46, 53, 57, 68] (e.g. from district level coordinators [51]), selecting and training an 'IPT champion' [51, 54], text messaging reminders of key criteria to determine IPT eligibility [51], ensuring a consistent supply of INH and pyridoxine [53].</li> <li>- Involving local opinion leaders to change providers perception about IPT [48].</li> </ul> </li> <li>• Ensuring capacity for TB diagnosis &amp; TB treatment essential for provision of IPT (i.e. adequate number of trained providers, facility infrastructure, ensuring a consistent supply of drugs) [14, 45, 53].</li> <li>• Ensuring guidelines are well written, understandable and available at the health facility level [36, 53, 68].</li> <li>• Ensuring routine evaluation and re-evaluation of patients' eligibility for IPT [43, 64].</li> <li>• Availability of IPT recording tool (e.g. IPT register/ monitoring tool) [57].</li> <li>• Tools to document IPT status (e.g. sticker reminder on patient file) [57].</li> <li>• Tools to guide IPT decision making (e.g. paper-based work aid, or embedded electronic tool) [45].</li> </ul> |
| F4 | <p>Provision: Strategies to enhance health providers' prescribing practices of PT's (particularly IPT)</p> <ul style="list-style-type: none"> <li>• Closing providers' knowledge gaps and enhancing their attitudes towards PT (particularly regarding IPT): <ul style="list-style-type: none"> <li>- Educational campaigns &amp; advocacy activities that include evidence basis and involve local opinion leaders, 'IPT champions' setting an example, prescribing IPT; positively influencing attitudes toward IPT [45, 46, 54, 66].</li> </ul> </li> <li>• Visible leadership, supervision and support of health providers: <ul style="list-style-type: none"> <li>- Roles &amp; responsibilities in PT provision clear [42, 63].</li> <li>- Reinforcing national guidelines, provider encouragement by IPT champion and at weekly group meetings [51].</li> <li>- One-on-one mentorship &amp; supervision with feedback to support continuous skill acquisition and health providers' confidence to deliver tasks (e.g. ruling out TB, recording patient information, prescription of PT, prepare for- and managing side effects, treatment decisions for complex cases) [39, 46, 49-51, 53, 54, 67].</li> <li>- Quality improvement approach to identify problems and take corrective action (teaching basic concept, routine data collection, chart analysis, weekly collaborative meetings to discuss successes and challenges) [57, 66].</li> <li>- Quarterly site visits for record review (e.g. organised by district TB, HIV programme managers) [57, 64].</li> </ul> </li> <li>• Empowering patients to ask for IPT (e.g. posters and health education sessions at the health facility) [51].</li> <li>• Review the process of PT delivery [49], tailoring it to the clinic routine [67], considering contextual challenges [68]: <ul style="list-style-type: none"> <li>- Participatory approach (involving health providers) [49, 67], generation and use of data, lessons learnt [57].</li> <li>- Consider reorganising services, improving patient flow within the clinic to avoid long waits [46, 56, 63].</li> </ul> </li> </ul>                                                                                                                                                                                                                                                                                                                                                                                                                                                                                                                                                                                                                                                                                                                                                                                                                                                                                                                                                                                                                                                            |

## Implementation of cotrimoxazole and isoniazid – preventive therapies for people with HIV.

|    |                                                                                                                                                                                                                                                                                                                                                                                                                                                                                                                                                                                                                                                                                                                                                                                                                                                                                                                                                                                                                                                                                                                                                                                                                                                                                                                                                                                                                                                                                                                                                                                                                                                                                                                                                                                                                                                                                                                                                                                                                                                                                                                                                                                                                                                                                                                                                                                                                                                                                                                                                                                                                                                                 |
|----|-----------------------------------------------------------------------------------------------------------------------------------------------------------------------------------------------------------------------------------------------------------------------------------------------------------------------------------------------------------------------------------------------------------------------------------------------------------------------------------------------------------------------------------------------------------------------------------------------------------------------------------------------------------------------------------------------------------------------------------------------------------------------------------------------------------------------------------------------------------------------------------------------------------------------------------------------------------------------------------------------------------------------------------------------------------------------------------------------------------------------------------------------------------------------------------------------------------------------------------------------------------------------------------------------------------------------------------------------------------------------------------------------------------------------------------------------------------------------------------------------------------------------------------------------------------------------------------------------------------------------------------------------------------------------------------------------------------------------------------------------------------------------------------------------------------------------------------------------------------------------------------------------------------------------------------------------------------------------------------------------------------------------------------------------------------------------------------------------------------------------------------------------------------------------------------------------------------------------------------------------------------------------------------------------------------------------------------------------------------------------------------------------------------------------------------------------------------------------------------------------------------------------------------------------------------------------------------------------------------------------------------------------------------------|
| F5 | <p><b>Availability: Strategies to improve the availability of PT's at public health facilities and pharmacies</b></p> <ul style="list-style-type: none"> <li>• Focus on ensuring the availability of CTZ and INH [14, 45, 50, 51, 64]: <ul style="list-style-type: none"> <li>- Improving technical and logistic capacity at health facilities [68].</li> <li>- Personnel responsible for inventory management, stock audits &amp; the availability of stock at each level [45, 50].</li> <li>- District level initiatives to improve INH availability (e.g. monthly monitoring of INH) [51].</li> <li>- Improving supply chain management [14, 15, 45, 53, 57, 68].</li> <li>- Implementing a stock inventory management system [36], detailed accounting of stock supplies at all levels [45].</li> <li>- Quantification and demand forecasting [36]; include back-up stock (additional buffer) [45].</li> <li>- Routine stock audits to identify &amp; address INH stock-outs at health facilities and pharmacies [65].</li> <li>- Developing stock capacities centrally, decentralised and at the health facility level [33, 45].</li> </ul> </li> <li>• Health facility approach for insufficient stock: <ul style="list-style-type: none"> <li>- Prioritising patient subgroups (e.g. based on CD4 count, compliant with clinic visits, adherence to ART) [62].</li> <li>- Earmarking drugs for a full course of IPT (e.g. 6-months) for each patient who initiated IPT [57, 62].</li> </ul> </li> <li>• Health facility approaches in case of stock-outs: <ul style="list-style-type: none"> <li>- Informing patients about stock-outs to avoid confusion (e.g. patient may think he/she completed PT) [50].</li> <li>- Prescribing alternative formulation of CTZ/ INH (e.g. tablets instead of suspension for children) [15].</li> <li>- Advising patients to return when stock is available [15] or buy CTZ/ INH in private pharmacies [15, 35, 36, 38].</li> </ul> </li> </ul>                                                                                                                                                                                                                                                                                                                                                                                                                                                                                                                                                                                                                                                                       |
| F6 | <p><b>Adherence: Strategies to enhance patients willingness and feasibility to adhere to PT's</b></p> <ul style="list-style-type: none"> <li>• Individual assessment of patients' needs, concerns and feasibility to initiate IPT: <ul style="list-style-type: none"> <li>- Consider initiating IPT at the time of HIV diagnosis [55].</li> <li>- Need for providers to discuss patients' feasibility of (e.g. monthly) clinic visits, and offer PT based on individual assessment of patient's needs, concerns and commitment to follow clinic visits [15, 50, 61].</li> <li>- Discussing patients' travel plans (e.g. consider prescribing &gt;2months of IPT for patients who will travel [50].</li> <li>- Facilitate clinic transfer between different cities/ provinces or allow treatment supply in advance [50].</li> </ul> </li> <li>• Allowing more time before enrolling patients into intensive treatment regimen (if policy &amp; guideline allows) [44, 63].</li> <li>• Educating patients before initiating IPT [64]: <ul style="list-style-type: none"> <li>- Risk of developing TB, importance of IPT, side effects; dapsons, pyridoxine to manage side effects [31, 50, 64].</li> <li>- Encouraging patients to report problems or complaints [50], support patients in managing side effects [64].</li> <li>- Encourage patients to disclose HIV diagnosis to a trusted person or family member [63].</li> </ul> </li> <li>• Health facility support services: <ul style="list-style-type: none"> <li>- Support groups, nutritionist, food parcels, multivitamins [63], transport support [62, 63].</li> <li>- Couple testing [34], Involvement of partner/ friend during initiation of IPT; ensuring family approval of PT [34, 60].</li> </ul> </li> <li>• Patients' adherence support: <ul style="list-style-type: none"> <li>- Social support or feeling comfortable taking PT in front of others [34, 36, 40, 60, 66].</li> <li>- Reminder systems developed by patients (e.g. phone alarms [34, 61], marking a calendar [61]).</li> <li>- Adherence club member collects ART and INH for the group members [64].</li> </ul> </li> <li>• Health facility-based adherence support: <ul style="list-style-type: none"> <li>- clinic visit reminders or follow-up by health providers (e.g. through phone calls, home visits to follow up and encourage defaulters/ community tracing) [36, 44, 53, 61, 63].</li> <li>- Adherence assessment (patient self-report, pill counts during treatment refills, INH metabolite testing) [36, 65].</li> <li>- Provider encouragement and follow-up to adhere to PT [53, 64].</li> </ul> </li> </ul> |
| F7 | <p><b>Retention in care: Strategies that encourage patients' completion of PT</b></p> <ul style="list-style-type: none"> <li>• Patients self-motivation: <ul style="list-style-type: none"> <li>- Belief that PT is useful improves health status or is important to prevent disease [31, 34, 50, 60, 64, 66].</li> <li>- Belief in personal health threat or fear of disease (e.g. concern about family) [34, 61].</li> <li>- Belief in the effectiveness of health care, understanding the importance of PT's.</li> </ul> </li> <li>• Acceptance of HIV status, disclosure to supportive person, comfortable to take PT in front of others [58, 61, 63, 64].</li> <li>• Reducing patients' need to travel to multiple clinics: <ul style="list-style-type: none"> <li>- Same-day appointments for family members [34].</li> <li>- HIV service integration with other services (e.g. providing ART + IPT; TB treatment + CPT at the same time and location) [38, 43, 46, 50, 68].</li> </ul> </li> <li>• Reducing patients' frequency of health facility visits and medication pickups: <ul style="list-style-type: none"> <li>- Differentiated care: e.g. quarterly clinic attendance for clinically 'stable' PLHIV [50, 66].</li> <li>- Home visits or home-based care (with health facility referral of complex cases) [36, 66].</li> <li>- Adherence club member collects ART and INH for the group of members [64].</li> </ul> </li> <li>• Positive attitudes of health providers or good provider-patient relationship [64].</li> <li>• Patient follow-up or linking HIV+ patients to community tracing in case they miss clinic appointments [53, 63].</li> </ul>                                                                                                                                                                                                                                                                                                                                                                                                                                                                                                                                                                                                                                                                                                                                                                                                                                                                                                                                                                                       |

Implementation of cotrimoxazole and isoniazid – preventive therapies for people with HIV.

## 1301 **Discussion**

1302 In high TB/HIV burden countries, both preventive therapies in the centre of this  
1303 review (i.e. CPT, IPT) are key interventions for PLHIV that can save lives if administered  
1304 together with ART, or even on their own [6, 9]. However, governments of high TB/HIV  
1305 burden countries face major implementation challenges that limit the effectiveness of both  
1306 preventive therapies [16-18]. We explored and compared both preventive therapies with  
1307 respect to similarities and differences of barriers identified across high TB/HIV burden  
1308 countries published in peer-reviewed literature. Additionally, we explored and summarised  
1309 strategies (facilitators) with the potential to tackle the identified barriers.

## 1310 **Similarities and differences in barriers**

1311 Detailed barrier description presented in this review offered various explanations to  
1312 why the implementation of both preventive therapies has been so challenging in the  
1313 concerned countries. However, careful analysis of the extracted barrier information showed  
1314 that many barriers were very similar for both preventive therapies. Our metasummary  
1315 findings showed that the majority of barrier themes (25/32) that emerged from this review  
1316 were identical for CPT and IPT and thus not intervention-specific (Figs 3 and 4). This leads  
1317 to the question: "What are the underlying patterns of these cross-cutting barrier themes?"  
1318 Taking into consideration that cross-cutting barrier themes were scattered across all building  
1319 blocks of the health system and rather generic in nature indicates that systematic  
1320 weaknesses within the health system may be an important underlying reason for  
1321 implementation struggles. All barrier reporting studies (N=37), except one [52], reported  
1322 such cross-cutting barriers, which at least hints that many high TB/HIV burden countries'  
1323 health systems were weak and unable to meet the basic requirements of a well-functioning  
1324 health system [27]. Fragile public health systems could be explained by the fact that more  
1325 than three-quarters of the countries with a high burden of TB and HIV are low- and lower-  
1326 middle-income countries (as per 2021 World Bank's classification) [69]. Many of these

## Implementation of cotrimoxazole and isoniazid – preventive therapies for people with HIV.

1327 countries have severely constrained health budgets and historically depend on foreign  
1328 assistance [70]. Following two decades of increasing domestic and generous international  
1329 funding that has been mainly channelled into vertical health programs, impressive gains  
1330 have been achieved in reducing AIDS-related deaths [27]. However, health systems  
1331 strengthening is not characteristic for vertical funding and healthcare organisation. A major  
1332 concern is that impressive gains of the past have been neither universal, nor sustainable  
1333 [27]. We speculate that the sustainability of the HIV response and health facility-based  
1334 delivery of both preventive therapies will become more challenging over the next years. The  
1335 dilemma is that funding from international donors is flatlining [70], while an increasing  
1336 number of HIV patients require life-long medical care [71] to be delivered by vertical  
1337 programs that have long reached the limit of their effectiveness. Others have claimed that  
1338 strengthening weak public health systems in the developing world is the next 'emergency'  
1339 and an inevitable step to sustain the progress achieved in the last two decades [72]. At this  
1340 stage of understanding, we believe it is quite possible that health system constraints  
1341 identified for CPT and IPT, similarly hinder the implementation of other health facility-based  
1342 interventions in high TB/HIV burden countries. Therefore, in addition to intervention-specific  
1343 barriers, context-specific health system constraints should be considered to move towards a  
1344 more feasible implementation strategy.

1345         Like for CPT, barriers identified for IPT were most frequently classified as 'service  
1346 delivery-' or 'patient & community related'. Typically, 'service delivery related barriers' were  
1347 interrelated with constraints identified across other health system components. For instance,  
1348 with inaccurate clinical information, insufficient health providers and frequent drug stock-  
1349 outs, efficient and reliable delivery of preventive therapy is unrealistic. These interrelations  
1350 highlight that service delivery strongly depends on a well-functioning interplay of the health  
1351 system components represented in the original WHO's Framework for action [27]. We  
1352 observed that barriers identified across the six original health system components (i.e. health  
1353 workforce, information systems, essential medicines, financing, leadership/ governance,

## Implementation of cotrimoxazole and isoniazid – preventive therapies for people with HIV.

1354 service delivery) represented constraints on the supply side. Meanwhile, 'patient and  
1355 community-related barriers' comprised limitations that limited the demand of preventive  
1356 therapies, hindering patients from entering healthcare, leading to inconsistent clinic visits or  
1357 therapy interruptions. Among all 'patient and community-related barriers', we would like to  
1358 draw special attention to 'lacking financial and organisational feasibility'. This barrier theme  
1359 was supported by more than one third of all studies included in this review [12, 15, 16, 22,  
1360 23, 25, 28, 31, 40-45], suggesting that in resource-constrained countries and in the context  
1361 of poverty, free provision of health facility-based services may not be sufficient to ensure  
1362 equitable access to healthcare. The economic impact of COVID-19 is expected to further  
1363 decrease patients' average household income in the coming years, posing an increasing  
1364 threat to their ability to commit to frequent health facility visits and medication pickups.  
1365 Summarising the above, barriers to both, CPT and IPT were most frequently classified as  
1366 'service delivery-' or 'patient & community related', representing supply- and demand-side  
1367 constraints that introduce complex, interrelated dynamics [73]. Therefore, we emphasise the  
1368 value of a 'seven component health system framework' for the purpose of barrier exploration  
1369 and the formulation of an implementation strategy that is tailored to address potential  
1370 barriers on the supply- and demand-side.

1371 We also revealed some differences between barriers to both preventive therapies.  
1372 Overall, our review suggests that implementing IPT has been more troublesome than CPT,  
1373 supported by overall more barrier themes and evidence reporting barriers to IPT. This is  
1374 consistent with the cross-sectional study carried out by WHO HIV/AIDS programme officers  
1375 in 2007 [74], which showed that less progress had been made in implementing IPT when  
1376 compared to CPT at the time. Thus, more research focus may have been on IPT since.  
1377 Nevertheless, we argue that there is also more complexity involved in the eligibility  
1378 assessment and provision of IPT compared to the more straightforward provision of CPT.  
1379 Implementing IPT requires a higher degree of coordination; its delivery involves multiple  
1380 steps, requires particular skills and seems to depend on additional capacity (particularly

## Implementation of cotrimoxazole and isoniazid – preventive therapies for people with HIV.

1381 human resources) to follow-up patients who initiated IPT and those with a positive TB  
1382 screening result.

1383           Considering challenges specific to implementing IPT, 'health provider related barriers'  
1384 appeared to play an important role. Our review revealed that having to rule out active TB  
1385 disease was an important issue for the implementation of IPT. First, local policies and  
1386 guidelines were described as unclear, so that health providers lacked knowledge and  
1387 confidence in determining who is eligible for IPT [14, 68]. Second, health providers appeared  
1388 to be overwhelmed with this additional task of routinely assessing and documenting patients'  
1389 eligibility [38, 51]. Third, while health providers attitudes towards CPT seemed neutral or  
1390 positive, providers' attitudes and beliefs toward IPT were partially negative [14, 44, 45, 53,  
1391 54, 62, 64, 67, 68]. One health provider concern was that extrapulmonary TB, common  
1392 among PLHIV, may go undetected when screening for pulmonary symptoms [54]. Some  
1393 health providers appeared to be unconvinced whether the benefits of IPT outweigh the risks  
1394 of side effects [14, 53, 68] or of promoting INH resistance [45, 54, 64, 68]. Studies carried  
1395 out in sub-Saharan Africa reported that some health providers had refused to prescribe IPT  
1396 because of their fear of promoting INH resistance [54]. Overall, the use of preventive  
1397 therapies has often been controversial, with concerns about drug resistance forming one  
1398 major barrier to policy development and implementation [75]. However, it was somewhat  
1399 surprising that studies reported health providers' concern about bacterial resistance for IPT  
1400 [45, 54, 68], but not for CPT. Notably, many high TB/HIV burden countries witness a high  
1401 burden of MDR-TB [2]. Instead of INH monoresistance, health providers' genuine concern  
1402 may thus lay in promoting MDR-TB among patients with HIV [54]. Another surprising barrier  
1403 theme identified specifically for IPT was provider-patient communication [50, 51, 58], which  
1404 could indicate that communication needs are greater for IPT. However, only three studies  
1405 reported issues with provider-patient communication regarding IPT [50, 51, 58]. Therefore,  
1406 this barrier could also be indicative for changing patient expectations. A popular explanation  
1407 is that the patient-provider relationship has changed over time. Health providers are no

## Implementation of cotrimoxazole and isoniazid – preventive therapies for people with HIV.

1408 longer seen as the dominant decision-makers and patients as passive service recipients (i.e.  
1409 paternalistic model) [76]. Instead, patients expect and are expected to be actively involved in  
1410 their therapy decision [76]. Based on our review findings, patients were often afraid to speak  
1411 to health providers about IPT [50, 51, 58], suggesting that providers may require additional  
1412 training in how to develop a trusting provider-patient relationship and encourage their  
1413 patients to address any arising concern. With the increasing global interest in TB prevention  
1414 [2], several studies have been dedicated to assessing socio-demographic, lifestyle- and  
1415 clinical factors associated with HIV patients' chances of initiating, receiving, completing or  
1416 adhering to IPT [14, 46, 48, 55, 58-60, 62, 66, 68]. These studies highlight key populations  
1417 that may benefit from tailored implementation approaches. Another important factor for the  
1418 implementation of IPT is that, in contrast to CPT, IPT requires greater coordination between  
1419 HIV and TB program at all levels. Many high TB/HIV burden countries have implemented  
1420 symptom-based screening to determine patients eligible for IPT [47], which is believed to  
1421 have significantly advanced IPT uptake in low-resource settings [53]. On the one hand,  
1422 symptom-based screening enabled HIV services units to take greater responsibility for  
1423 implementing IPT. However, findings of the studies included in this review suggest that TB  
1424 services' capacity and linkage was too weak to follow-up patients with presumptive TB and  
1425 to ensure immediate TB treatment for patients with confirmed TB [14, 38, 45, 49, 52, 54, 64,  
1426 67]. This leads to another challenge that is particular for IPT; it requires collaboration and  
1427 capacity for the co-management of TB.

1428         Considering challenges specific to the implementation of CPT, we found that  
1429 bacterial resistance was a concern raised by the authors of a study included in our review  
1430 [35]. Mwambete and Kamuhabwa (2016) questioned the efficacy of CTZ in areas of high  
1431 bacterial resistance as a result of their research findings. Based on the disk diffusion  
1432 method, their study identified an overall high resistance of isolated enteric *E. coli* among HIV  
1433 patients in Tanzania [35]. Although antimicrobial resistance is a topic of utmost urgency,  
1434 there are reasons to doubt the urgent need to reconsider the use of CPT in high TB/HIV



## Implementation of cotrimoxazole and isoniazid – preventive therapies for people with HIV.

1435 burden countries. On the one hand, the in-vitro assay applied in the study [35] is no longer  
1436 the gold standard for antimicrobial susceptibility testing because it often disqualifies  
1437 antibiotics that are, in fact, effective in-vivo [77, 78]. On the other hand, several studies have  
1438 shown significant reductions in morbidity and mortality among PLHIV on CPT, despite the  
1439 fact that they were carried out in settings with high bacterial resistance. Therefore, others  
1440 have argued that in-vitro resistance testing undermines the prophylactic ability of CTZ [79].  
1441 Finally, one study included in our review suggested a lack of written instructions for patients,  
1442 referring to missing documented strategies for ensuring the availability of CTZ at the health  
1443 facilities and patient leaflets that list potential adverse reactions that require therapy  
1444 interruption [36]. Although we revealed several knowledge gaps and misperceptions among  
1445 patients in our review that could be addressed in written instructions, the provision of patient  
1446 information leaflets, in general, is not yet standard practice in many low- and middle- income  
1447 countries [80]. One popular explanation for the under-utilisation of information leaflets at  
1448 public pharmacies is that they are poorly understood [81]. Poor understanding may be more  
1449 pronounced among populations with low literacy, which may have led to low prioritisation of  
1450 creating such written information in the concerned countries. However, in combination with  
1451 pictograms, basic written information has shown valuable for educating patients about CPT  
1452 [80]. Nevertheless, such patient leaflets are still not available in all countries, reemphasising  
1453 the importance of effective provider-patient communication during direct patient contact.

## 1454 **Facilitators to preventive therapies**

1455 As barriers vary between and within high TB/HIV burden countries, there is not one  
1456 strategy for improving the implementation of either or both preventive therapies that fits all  
1457 settings. We, therefore, encourage redesigning an implementation strategy that addresses  
1458 barriers identified in a specific context. The awareness of implementation challenges and  
1459 political williness to tackle these issues are critical first steps for continuous improvement.  
1460 Routinely collected indicators, district-level evaluations, dialogues with implementers or local

## Implementation of cotrimoxazole and isoniazid – preventive therapies for people with HIV.

1461 research findings may indicate difficulties with the implementation of one or both preventive  
1462 therapies on a national level or in a specific setting. Our review identified only a few  
1463 intervention-specific barriers and highlighted that cross-cutting barriers often affect the  
1464 implementation of both preventive therapies and potentially other interventions in high  
1465 TB/HIV burden countries. On the one hand, the resulting awareness that strategies are  
1466 needed to target systematic weaknesses, as well as an intervention on its own, can be  
1467 daunting. On the other hand, integrating the concept of health systems strengthening into an  
1468 implementation strategy provides new opportunities for policymakers and health systems.  
1469 These opportunities include improvements in health system sustainability, effectiveness and  
1470 the availability of international support for health systems strengthening.

1471 First, health systems strengthening may still appear unrealistic in low-income  
1472 countries where primary care facilities struggle to provide basic health services and essential  
1473 medicines. Additionally, funding mechanisms have partially encouraged vertical health  
1474 system organisation and made it more difficult for health systems strengthening to be  
1475 achieved in low- and middle-income countries. However, the decision for ‘organisational  
1476 transformation’ is not based on the capacity of an individual primary care facility but rather,  
1477 the potential behind removing cross-programmatic duplications and leveraging the existing  
1478 resources. Transforming a health system structurally from fully vertical (e.g. disease-specific)  
1479 programmes into a horizontally organised health system should be a gradual process.  
1480 Similarly, others have argued that a phased, targeted and incremental transition from a  
1481 vertical HIV response to a more efficient and sustainable health system response should be  
1482 the way forward [71]. Adapting the implementation strategy of a high-impact multi-  
1483 programmatic intervention, such as IPT, provides an opportunity to contribute to a more  
1484 sustainable health system transformation.

1485 Second, we understand that health systems strengthening is ambitious to achieve  
1486 holistically, is difficult to measure and can be expected to take a long time. However,  
1487 targeted strengthening of a selected health system component, such as up-skilling

## Implementation of cotrimoxazole and isoniazid – preventive therapies for people with HIV.

1488 leadership and governance, reinforcing health providers' capacity and knowledge,  
1489 strengthening supply chains or health information systems comprise examples frequently  
1490 identified in this review with the potential to yield benefits across both preventive therapies  
1491 and a wide range of other health interventions. In addition, strengthening an individual health  
1492 system component can help relax capacity constraints, result in cost-sharing, increase  
1493 efficiency and cost-effectiveness of individual interventions. Cost-effectiveness analysis can  
1494 assist in establishing the optimal balance between systems strengthening- and intervention-  
1495 specific approaches to be included in an implementation strategy [82].

1496 Third, vertical programmes of the past were popular for their 'quantifying of lives  
1497 saved' approach that promised and short term objectives that promised quick and  
1498 measurable results [83]. However, disease-specific programmes and initiatives were  
1499 criticised for their costly parallel structures, less sustained impact, and for negatively  
1500 affecting non-HIV care [72, 83]. In high TB/HIV burden countries that depend on external  
1501 funds to finance their HIV response, vertical programming was associated with donor-driven  
1502 policy evolution and investment decisions that were not always aligned with national  
1503 priorities [56]. 'Pushing' global recommendations without considering context-specific  
1504 constraints undermines the competence of local policymakers and can create tension  
1505 between donors and recipient countries' governments and weaken local policy ownership.  
1506 For example, instead of prioritising prevention activities, donors' investment focus was  
1507 considered primarily strong on medicines, without adequate consideration of health system  
1508 capacity (e.g. human resources) on which the delivery of these medicines is dependent [14,  
1509 56, 71].

1510 However, many of these issues have been recognised internationally, and the global  
1511 health systems strengthening movement has finally gained momentum [84, 85]. Major HIV  
1512 funding bodies (i.e. USAID, Global Fund) have begun promoting the 'de-verticalisation' of  
1513 fragmented programming [84, 86]. Both, the U.S. Agency for International Development  
1514 (USAID) and the Global Fund to fight AIDS, TB and Malaria (Global Fund) have incorporated

Implementation of cotrimoxazole and isoniazid – preventive therapies for people with HIV.

1515 systems strengthening objectives into their strategy [84, 86] and updated their policies to  
1516 include funding agreements for health systems strengthening that allow direct disbursement  
1517 of funds to the recipient country's state budget [83, 87]. Dialogues between donors and local  
1518 system stakeholders (e.g. USAID's Government to Government (G2G) assistance, Global  
1519 Fund's country coordinating mechanism (CCM)) support alignment of policies with country  
1520 priorities [83, 87], encouraging mutually beneficial decisions and better relationships  
1521 between donors and recipient countries. Additionally, the new implementation science  
1522 culture encourages consideration of national, regional and local lessons learnt [46, 63, 88].  
1523 To sum up, the foundation for change has been laid. It is now up to high burden countries'  
1524 governments to make best use of the support and domestic resources available for health to  
1525 collaboratively select, plan and coordinate an implementation strategy that addresses  
1526 context-specific barriers and maximises the likelihood of long-term sustainability of both  
1527 interventions.

## 1528 **Strengths and limitations**

1529 The main strength of this review is the in-depth understanding that this review  
1530 provides about the challenges associated with the implementation of CPT and IPT in  
1531 countries with a high burden of TB and HIV. To explore the existing body of evidence  
1532 holistically, (1) we applied a comprehensive search strategy, (2) included all stakeholders  
1533 involved in the implementation process as study population, (3) integrated research with  
1534 different study designs, and (4) presented the identified barriers within each of the building  
1535 blocks of the health system. First, we systematically searched three databases, using a  
1536 combination of MeSH and free-text terms. In addition, we manually screened reference lists  
1537 of systematic reviews for original research eligible for this review. Second, our review  
1538 included studies that reported the perspectives and experiences of any stakeholder involved  
1539 in the implementation process, encompassing patients' and health providers' views that are  
1540 otherwise often disregarded in the implementation process. Third, the integration of studies

## Implementation of cotrimoxazole and isoniazid – preventive therapies for people with HIV.

1541 with different study designs further enhanced the richness of our findings. Mixed methods  
1542 systematic reviews have gained increasing scientific attention in the areas of public health  
1543 and complex interventions, where typically decision makers require consideration of different  
1544 types of data and information (e.g. accessibility, feasibility, patient values and preferences)  
1545 [18]. Fourth, for the qualitative evidence synthesis of barrier information, we applied a highly  
1546 transparent deductive approach using an a priori defined coding framework of seven health  
1547 system components (a modification of the WHO's Framework for action) [27]. Qualitative  
1548 evidence synthesis is relatively new compared to quantitatively oriented systematic reviews  
1549 and the application of metasummary to compare interventions with respect to similarities and  
1550 differences of barriers employed in our review is innovative.

1551 Potential limitations of our review include (1) restrictions in our search strategy, (2)  
1552 methodological limitations of the included studies, (3) heterogeneity of study characteristics,  
1553 and (4) potential biases introduced through the non-availability of studies or the non-  
1554 dissemination of study findings. First, although our search strategy was systematic and  
1555 rigorous, it only included peer-reviewed publications reported in the English language. This  
1556 is unlikely to be a major limitation considering that twenty-three high burden countries were  
1557 represented in this review. However, this may explain why most studies included in this  
1558 review, were carried out in South Africa, Uganda and Tanzania. Only including peer-  
1559 reviewed published studies may have led to the exclusion of potentially useful grey reports  
1560 (e.g. HIV progress reports). Second, we did not exclude any study from our analysis  
1561 regardless of the methodological limitations. However, we systematically assessed each  
1562 study's strengths and limitations and carefully considered issues of bias, validity, and  
1563 trustworthiness. Third, we identified a heterogeneous representation of the study populations  
1564 represented in our review. Most of the included studies presented the perspectives of  
1565 patients and health providers. Consequently, the views of caregivers, community members  
1566 and other stakeholders involved in the implementation process were less frequently  
1567 represented, limiting the generalisability of our findings. However, generalising findings was

Implementation of cotrimoxazole and isoniazid – preventive therapies for people with HIV.

1568 outside the scope of this review. Therefore, the primary concern about this observation is the  
1569 extent to which our findings holistically represent the phenomena of interest. Fourth, non-  
1570 availability or non-dissemination of studies may have limited the completeness of our study  
1571 findings [30]. Studies on the subject of this review may be less likely to be available in  
1572 countries with limited political interest to implement the concerned preventive therapies. In  
1573 high TB/HIV burden countries with little research capacity, available study findings may be  
1574 more likely to be published in local journals that are not indexed in major databases.

## 1575 **Conclusion**

1576 There is little benefit to any highly efficacious therapy as long as we are unable to  
1577 effectively implement it under ‘real-world’ conditions.

1578 For policymakers who encounter challenges with the implementation of either or both  
1579 preventive therapies, this review offers a list of strategies for improving the implementation of  
1580 both preventive therapies. Based on evidence from high TB/HIV burden countries, this list  
1581 includes specific direction for improving the delivery of IPT (or any newer therapy regimen)  
1582 for the prevention of TB. For researchers with limited working experience in high TB/HIV  
1583 burden countries, this review can provide useful insights regarding to which barriers may  
1584 arise at different levels of the health system. The barrier description provided in this review  
1585 highlights the complexity of social interactions involved in the delivery of preventive  
1586 therapies.

1587 Overall, our review showed that until today, many high TB/HIV burden countries’  
1588 health systems are not prepared to ensure appropriate public healthcare for the ever  
1589 increasing number of patients in need of HIV services. From this standpoint, health system  
1590 strengthening is imperative for the sustainable delivery of both preventive therapies for  
1591 PLHIV, but particularly for IPT. Based on our findings, we suggest consideration of two  
1592 important aspects to implementation. First, we recommend early engagement of

## Implementation of cotrimoxazole and isoniazid – preventive therapies for people with HIV.

1593 stakeholders when shaping an implementation strategy. Involving patients and health  
1594 providers in the process of policy development and planning may increase awareness and  
1595 understanding about the intervention and help to ensure its acceptability. Additional  
1596 stakeholders (e.g. church leaders, traditional healers) may be involved, if appropriate.  
1597 Second, during the adaptation of an implementation strategy, we urge that attention is paid  
1598 to the fact that many of the countries with the highest burden of TB and HIV to date are also  
1599 among the most resource-constrained countries. Thus, novel strategies for the  
1600 implementation of preventive therapies may appear encouraging at first, but in high TB/HIV  
1601 burden settings, they are often far from feasible or sustainable on a big scale. Instead, we  
1602 encourage innovative approaches that consider the resources available at the health facility  
1603 level, and investing into strengthening the existing capacities.

1604 Future research is warranted to test and evaluate alternative service delivery  
1605 approaches that reduce the financial and organisational burden that patients face during the  
1606 course of preventive therapy. Replacing INH with one of the shorter treatment regimen  
1607 recommended by WHO for the prevention of TB [13] and the community-based delivery of  
1608 selected activities related to the provision of PT's may comprise two options with the  
1609 additional benefit of reducing the patient load at the overburdened health facilities.

1610

## 1611 **Funding**

1612 This study was funded by the Portuguese Foundation for Science and Technology  
1613 (Fundação para a Ciência e a Tecnologia - FCT, [www.FCT.pt](http://www.FCT.pt)), through funds to the Global  
1614 Health and Tropical Medicine Research Center (Grant number: GHTM -  
1615 UID/Multi/04413/2013). The study was supported by funds from the German Federal Ministry  
1616 of Education and Research (Bundesministerium für Bildung und Forschung – BMBF,  
1617 <https://www.bmbf.de/>), through funds to the Hans-Böckler Stiftung (HBS). LVL was funded

Implementation of cotrimoxazole and isoniazid – preventive therapies for people with HIV.

1618 by the FCT grant. PM received a Research Scholarship from the HBS (PhD Scholarship ID:  
1619 385759). The funders had no role in study design, data collection and analysis, decision to  
1620 publish, or preparation of the manuscript.

## 1621 **Acknowledgement**

1622 We would like to express our gratitude to Jonathan O' Mahony for proofreading the  
1623 manuscript. In addition, we would like to thank Carlos Rodrigues, IT specialist at the Institute  
1624 of Hygiene & Tropical Medicine in Lisbon for his support with formatting the graphics  
1625 included in this manuscript.



## Implementation of cotrimoxazole and isoniazid – preventive therapies for people with HIV.

### 1626 **References**

- 1627 1. UNAIDS. Global HIV & AIDS statistics - 2020 fact sheet. 2020. Available from:  
1628 <https://www.unaids.org/en/resources/fact-sheet>.
- 1629 2. World Health Organization. Global Tuberculosis Report 2020. 2020. Available from:  
1630 <https://www.who.int/publications/i/item/9789240013131>.
- 1631 3. Cohen A, Mathiasen VD, Schön T, Wejse C. The global prevalence of latent  
1632 tuberculosis: a systematic review and meta-analysis. The European respiratory  
1633 journal. 2019;54(3). Epub 2019/06/22. doi: 10.1183/13993003.00655-2019. PubMed  
1634 PMID: 31221810.
- 1635 4. World Health Organization. WHO consolidated guidelines on tuberculosis:  
1636 tuberculosis preventive treatment: Module 1. Prevention: Tuberculosis preventive  
1637 treatment 2020. Available from: [https://www.who.int/publications/i/item/who-](https://www.who.int/publications/i/item/who-consolidated-guidelines-on-tuberculosis-module-1-prevention-tuberculosis-preventive-treatment)  
1638 [consolidated-guidelines-on-tuberculosis-module-1-prevention-tuberculosis-](https://www.who.int/publications/i/item/who-consolidated-guidelines-on-tuberculosis-module-1-prevention-tuberculosis-preventive-treatment)  
1639 [preventive-treatment](https://www.who.int/publications/i/item/who-consolidated-guidelines-on-tuberculosis-module-1-prevention-tuberculosis-preventive-treatment).
- 1640 5. World Health Organization. Consolidated guidelines on the use of antiretroviral drugs  
1641 for treating and preventing HIV infection. chapter 5: Clinical guidelines: Managing  
1642 common coinfections and comorbidities.: World Health Organization; 2016. Available  
1643 from: <https://www.who.int/hiv/pub/arv/arv-2016/en/>.
- 1644 6. Suthar AB, Vitoria MA, Nagata JM, Anglaret X, Mbori-Ngacha D, Sued O, et al. Co-  
1645 trimoxazole prophylaxis in adults, including pregnant women, with HIV: a systematic  
1646 review and meta-analysis. The Lancet HIV. 2015;2(4):e137-e50.
- 1647 7. Geremew D, Endalamaw A, Negash M, Eshetie S, Tessema B. The protective effect  
1648 of isoniazid preventive therapy on tuberculosis incidence among HIV positive patients  
1649 receiving ART in Ethiopian settings: a meta-analysis. BMC infectious diseases.  
1650 2019;19(1):405. doi: 10.1186/s12879-019-4031-2.
- 1651 8. Eholié SP, Ello FN, Coffie PA, Héma A, Minta DK, Sawadogo A. Effect of  
1652 cotrimoxazole prophylaxis on malaria occurrence among HIV-infected adults in West  
1653 Africa: the MALHIV Study. Tropical Medicine and International Health.  
1654 2017;22(9):1186-95. Epub 2017/06/28. doi: 10.1111/tmi.12919. PubMed PMID:  
1655 28653454.
- 1656 9. Badje A, Moh R, Gabillard D, Guéhi C, Kabran M, Ntakpé J-B, et al. Effect of  
1657 isoniazid preventive therapy on risk of death in west African, HIV-infected adults with  
1658 high CD4 cell counts: long-term follow-up of the Temprano ANRS 12136 trial. The  
1659 Lancet Global Health. 2017;5(11):e1080-e9.
- 1660 10. Akolo C, Adetifa I, Shepperd S, Volmink J. Treatment of latent tuberculosis infection  
1661 in HIV infected persons. Cochrane database of systematic reviews. 2010;(1). doi:  
1662 10.1002/14651858.CD000171.pub3.
- 1663 11. World Health Organization. Provisional WHO/UNAIDS Secretariat recommendations  
1664 on the use of cotrimoxazole prophylaxis in adults and children living with HIV/AIDS in  
1665 Africa. African Health Sciences. 2000;1(1):30-1.
- 1666 12. WHO/ UNAIDS. Policy statement on preventive therapy against tuberculosis in  
1667 people living with HIV 1998. Available from:  
1668 [https://apps.who.int/iris/bitstream/handle/10665/64509/WHO\\_TB\\_98.255.pdf?sequen](https://apps.who.int/iris/bitstream/handle/10665/64509/WHO_TB_98.255.pdf?sequence=1)  
1669 [ce=1](https://apps.who.int/iris/bitstream/handle/10665/64509/WHO_TB_98.255.pdf?sequence=1).
- 1670 13. World Health Organization. Tuberculosis. Key facts 2020. 14 October 2020:[Available  
1671 from: <https://www.who.int/news-room/fact-sheets/detail/tuberculosis>.

## Implementation of cotrimoxazole and isoniazid – preventive therapies for people with HIV.

- 1672 14. Mugomeri E, Olivier D, Van Den Heever WM. Health system challenges affecting the  
1673 implementation of isoniazid preventive therapy in people living with HIV in Lesotho.  
1674 HIV and AIDS Review. 2018;17(4):299-307. doi: 10.5114/hivar.2018.80263.
- 1675 15. Kamuhabwa AAR, Manyanga V. Challenges facing effective implementation of  
1676 cotrimoxazole prophylaxis in children born to HIV-infected mothers in the public  
1677 health facilities. Drug, healthcare and patient safety. 2015;7:147-56. doi:  
1678 10.2147/dhps.s89115. PubMed PMID: WOS:000215804900017.
- 1679 16. Thabane L, Thomas T, Ye C, Paul J. Posing the research question: not so simple.  
1680 Canadian journal of anaesthesia. 2009;56(1):71.
- 1681 17. Butler A, Hall H, Copnell B. A guide to writing a qualitative systematic review protocol  
1682 to enhance evidence-based practice in nursing and health care. Worldviews on  
1683 Evidence-Based Nursing. 2016;13(3):241-9.
- 1684 18. Joanna Briggs Institute. JBI Reviewer's Manual. Chapter 8: Mixed methods  
1685 systematic reviews. Section 8.5.1 Mixed methods systematic review using a  
1686 convergent integrated approach to synthesis and integration. 2017 [cited 1]. Available  
1687 from:  
1688 [https://wiki.jbi.global/display/MANUAL/8.5.1+++Mixed+methods+systematic+review+](https://wiki.jbi.global/display/MANUAL/8.5.1+++Mixed+methods+systematic+review+using+a+CONVERGENT+INTEGRATED+approach+to+synthesis+and+integration)  
1689 [using+a+CONVERGENT+INTEGRATED+approach+to+synthesis+and+integration](https://wiki.jbi.global/display/MANUAL/8.5.1+++Mixed+methods+systematic+review+using+a+CONVERGENT+INTEGRATED+approach+to+synthesis+and+integration).
- 1690 19. Moher D, Liberati A, Tetzlaff J, Altman DG. Preferred reporting items for systematic  
1691 reviews and meta-analyses: the PRISMA statement. Annals of internal medicine.  
1692 2009;151(4):264-9.
- 1693 20. Cumpston M, Chandler J. Chapter IV: updating a review 2019. Available from:  
1694 <https://training.cochrane.org/handbook/current/chapter-iv>.
- 1695 21. Hong QN, Pluye P, Fàbregues S, Bartlett G, Boardman F, Cargo M, et al. Mixed  
1696 methods appraisal tool (MMAT), version 2018. User guide. 2018. Available from:  
1697 [http://mixedmethodsappraisaltoolpublic.pbworks.com/w/file/attach/127916259/MMAT\\_](http://mixedmethodsappraisaltoolpublic.pbworks.com/w/file/attach/127916259/MMAT_2018_criteria-manual_2018-08-01_ENG.pdf)  
1698 [2018\\_criteria-manual\\_2018-08-01\\_ENG.pdf](http://mixedmethodsappraisaltoolpublic.pbworks.com/w/file/attach/127916259/MMAT_2018_criteria-manual_2018-08-01_ENG.pdf).
- 1699 22. Noyes J, Booth A, Flemming K, Garside R, Harden A, Lewin S, et al. Cochrane  
1700 Qualitative and Implementation Methods Group guidance series - paper 3: methods  
1701 for assessing methodological limitations, data extraction and synthesis, and  
1702 confidence in synthesized qualitative findings. Journal of clinical epidemiology.  
1703 2018;97:49-58.
- 1704 23. Hannes K. Chapter 4: Critical appraisal of qualitative research: Cochrane  
1705 Collaboration Qualitative Methods Group, 2011; 2011. Available from:  
1706 <http://cqrng.cochrane.org/supplemental-handbook-guidance>.
- 1707 24. Sandelowski M, Barroso J, Voils CI. Using qualitative metasummary to synthesize  
1708 qualitative and quantitative descriptive findings. Research in nursing & health.  
1709 2007;30(1):99-111.
- 1710 25. Petticrew M, Rehfuess E, Noyes J, Higgins JP, Mayhew A, Pantoja T, et al.  
1711 Synthesizing evidence on complex interventions: how meta-analytical, qualitative,  
1712 and mixed-method approaches can contribute. 2013;66(11):1230-43.
- 1713 26. Getahun H, Granich R, Sculier D, Gunneberg C, Blanc L, Nunn P, et al.  
1714 Implementation of isoniazid preventive therapy for people living with HIV worldwide:  
1715 barriers and solutions. AIDS. 2010;24:S57-S65.
- 1716 27. World Health Organization. Monitoring the building blocks of health systems: a  
1717 handbook of indicators and their measurement strategies: World Health  
1718 Organization; 2010. Available from:  
1719 [https://www.who.int/healthinfo/systems/WHO\\_MBHSS\\_2010\\_full\\_web.pdf](https://www.who.int/healthinfo/systems/WHO_MBHSS_2010_full_web.pdf).

## Implementation of cotrimoxazole and isoniazid – preventive therapies for people with HIV.

- 1720 28. Asonganyi E, Vaghasia M, Rodrigues C, Phadtare A, Ford A, Pietrobon R, et al.  
1721 Factors affecting compliance with clinical practice guidelines for pap smear screening  
1722 among healthcare providers in africa: systematic review and meta-summary of 2045  
1723 individuals. PLoS ONE. 2013;8(9):e72712. Epub 2013/09/27. doi:  
1724 10.1371/journal.pone.0072712. PubMed PMID: 24069156; PubMed Central PMCID:  
1725 PMCPMC3771969.
- 1726 29. Petticrew M, Egan M, Thomson H, Hamilton V, Kunkler R, Roberts H. Publication  
1727 bias in qualitative research: what becomes of qualitative research presented at  
1728 conferences? Journal of Epidemiology and Community Health. 2008;62(6):552-4.  
1729 doi: 10.1136/jech.2006.059394.
- 1730 30. Booth A, Lewin S, Glenton C, Munthe-Kaas H, Toews I, Noyes J, et al. Applying  
1731 GRADE-CERQual to qualitative evidence synthesis findings—paper 7: understanding  
1732 the potential impacts of dissemination bias. Implementation Science. 2018;13(1):12.  
1733 doi: 10.1186/s13012-017-0694-5.
- 1734 31. Okwera A, Mafigiri DK, Guwatudde D, Whalen C, Joloba M. Level of understanding  
1735 of co-trimoxazole use among HIV infected, recurrent pulmonary tuberculosis  
1736 suspects at a national referral tuberculosis clinic in Kampala, Uganda: a qualitative  
1737 analysis. Afr Health Sci. 2015;15(1):49-57. Epub 2015/04/04. doi:  
1738 10.4314/ahs.v15i1.7. PubMed PMID: 25834530; PubMed Central PMCID:  
1739 PMCPmc4370121.
- 1740 32. Chang LW, Nakigozi G, Billioux VG, Gray RH, Serwadda D, Quinn TC, et al.  
1741 Effectiveness of Peer Support on Care Engagement and Preventive Care  
1742 Intervention Utilization Among Pre-antiretroviral Therapy, HIV-Infected Adults in  
1743 Rakai, Uganda: A Randomized Trial. AIDS and Behavior. 2015;19(10):1742-51. doi:  
1744 10.1007/s10461-015-1159-y.
- 1745 33. Chan AK, Ford D, Namata H, Muzambi M, Nkhata MJ, Abongomera G, et al. The  
1746 Lablite project: A cross-sectional mapping survey of decentralized HIV service  
1747 provision in Malawi, Uganda and Zimbabwe. BMC health services research. 2014;14.  
1748 doi: 10.1186/1472-6963-14-352. PubMed PMID: WOS:000340917700001.
- 1749 34. Sibanda EL, Bernays S, Weller IV, Hakim JG, Cowan FM. Manuscript title:  
1750 Facilitators and barriers to cotrimoxazole prophylaxis among HIV exposed babies: a  
1751 qualitative study from Harare, Zimbabwe. BMC public health. 2015;15:784. Epub  
1752 2015/08/16. doi: 10.1186/s12889-015-2136-0. PubMed PMID: 26276143; PubMed  
1753 Central PMCID: PMCPmc4536866.
- 1754 35. Mwambete KD, Kamuhabwa AA. Resistance of commensal intestinal Escherichia coli  
1755 and other enterics to co-trimoxazole and commonly used antibiotics in HIV/AIDS  
1756 patients. Clinical Microbiology: Open Access. 2013.
- 1757 36. Kamuhabwa AA, Gordian R, Mutagonda RF. Implementation of co-trimoxazole  
1758 preventive therapy policy for malaria in HIV-infected pregnant women in the public  
1759 health facilities in Tanzania. Drug, healthcare and patient safety. 2016;8:91-100.  
1760 Epub 2016/12/23. doi: 10.2147/dhps.s119073. PubMed PMID: 28008284; PubMed  
1761 Central PMCID: PMCPmc5167525.
- 1762 37. Louwagie G, Girdler-Brown B, Odendaal R, Rossouw T, Johnson S, Van der Walt M.  
1763 Missed opportunities for accessing HIV care among Tshwane tuberculosis patients  
1764 under different models of care. Int J Tuberc Lung Dis. 2012;16(8):1052-8. doi:  
1765 10.5588/ijtld.11.0753. PubMed PMID: WOS:000306678800012.
- 1766 38. Okot-Chono R, Mugisha F, Adatu F, Madraa E, Dlodlo R, Fujiwara P. Health system  
1767 barriers affecting the implementation of collaborative TB-HIV services in Uganda. Int  
1768 J Tuberc Lung Dis. 2009;13(8):955-61.

## Implementation of cotrimoxazole and isoniazid – preventive therapies for people with HIV.

- 1769 39. Naikoba S, Senjovu KD, Mugabe P, McCarthy CF, Riley PL, Kadengye DT, et al.  
1770 Improved HIV and TB Knowledge and Competence among Mid-level Providers in a  
1771 Cluster-Randomized Trial of One-on-One Mentorship for Task Shifting. *Journal of*  
1772 *Acquired Immune Deficiency Syndromes*. 2017;75(5):e120-e7. doi:  
1773 10.1097/QAI.0000000000001378.
- 1774 40. Luyirika E, Towle MS, Achan J, Muhangi J, Senyimba C, Lule F, et al. Scaling Up  
1775 Paediatric HIV Care with an Integrated, Family-Centred Approach: An Observational  
1776 Case Study from Uganda. *PLoS ONE*. 2013;8(8). doi:  
1777 10.1371/journal.pone.0069548. PubMed PMID: WOS:000324401500013.
- 1778 41. Ansa GA, Walley JD, Siddiqi K, Wei X. Delivering TB/HIV services in Ghana: a  
1779 comparative study of service delivery models. *Transactions of the Royal Society of*  
1780 *Tropical Medicine and Hygiene*. 2014;108(9):560-7. doi: 10.1093/trstmh/tru110.  
1781 PubMed PMID: WOS:000343059500009.
- 1782 42. Horwood C, Haskins L, Vermaak K, Phakathi S, Subbaye R, Doherty T. Prevention of  
1783 mother to child transmission of HIV (PMTCT) programme in KwaZulu-Natal, South  
1784 Africa: an evaluation of PMTCT implementation and integration into routine maternal,  
1785 child and women's health services. *Tropical Medicine and International Health*.  
1786 2010;15(9):992-9. Epub 2010/06/22. doi: 10.1111/j.1365-3156.2010.02576.x.  
1787 PubMed PMID: 20561313.
- 1788 43. Adepoju AV, Ogbudebe CL, Adejumo OA, Okolie J, Inegbeboh JO. Implementation  
1789 of Isoniazid Preventive Therapy among People Living with HIV in Northwestern  
1790 Nigeria: Completion Rate and Predictive Factors. *J Glob Infect Dis*. 2020;12(2):105-  
1791 11. Epub 2020/08/11. doi: 10.4103/jgid.jgid\_138\_18. PubMed PMID: 32773999;  
1792 PubMed Central PMCID: PMC7384686.
- 1793 44. Aisu T, Raviglione MC, Eriki P, Narain J, Barugahare L, Tembo G, et al. Preventive  
1794 chemotherapy for HIV-associated tuberculosis in Uganda: an operational  
1795 assessment at a voluntary counselling and testing centre. *AIDS*. 1995;9(3):267-73.
- 1796 45. Catalani C, Green E, Owiti P, Keny A, Diero L, Yeung A, et al. A Clinical Decision  
1797 Support System for Integrating Tuberculosis and HIV Care in Kenya: A Human-  
1798 Centered Design Approach. *PLoS ONE*. 2014;9(8). doi:  
1799 10.1371/journal.pone.0103205. PubMed PMID: WOS:000341127500009.
- 1800 46. Durovni B, Cavalcante SC, Saraceni V, Vellozo V, Israel G, King BS, et al. The  
1801 implementation of isoniazid preventive therapy in HIV clinics: the experience from the  
1802 TB/HIV in Rio (THRio) study. *AIDS*. 2010;24(Suppl 5):S49.
- 1803 47. Faust L, Ruhwald M, Schumacher S, Pai M. How are high burden countries  
1804 implementing policies and tools for latent tuberculosis infection? A survey of current  
1805 practices and barriers. *Health Sci Rep*. 2020;3(2):e158. Epub 2020/05/07. doi:  
1806 10.1002/hsr2.158. PubMed PMID: 32373716; PubMed Central PMCID:  
1807 PMC7196590.
- 1808 48. Gust DA, Mosimaneotsile B, Mathebula U, Chingapane B, Gaul Z, Pals SL, et al.  
1809 Risk factors for non-adherence and loss to follow-up in a three-year clinical trial in  
1810 Botswana. *PLoS ONE*. 2011;6(4):e18435.
- 1811 49. Huerga H, Mueller Y, Ferlazzo G, Mpala Q, Bevilacqua P, Vasquez B, et al.  
1812 Implementation and Operational Research: Feasibility of Using Tuberculin Skin Test  
1813 Screening for Initiation of 36-Month Isoniazid Preventive Therapy in HIV-Infected  
1814 Patients in Resource-Constrained Settings. *JAIDS*. 2016;71(4):e89-95. Epub  
1815 2016/02/26. doi: 10.1097/qai.0000000000000895. PubMed PMID: 26910386.
- 1816 50. Jacobson KB, Niccolai L, Mtungwa N, Moll AP, Sheno SV. "It's about my life":  
1817 facilitators of and barriers to isoniazid preventive therapy completion among people

## Implementation of cotrimoxazole and isoniazid – preventive therapies for people with HIV.

- 1818 living with HIV in rural South Africa. *AIDS Care*. 2017;29(7):936-42. doi:  
1819 10.1080/09540121.2017.1283390. PubMed PMID: WOS:000402669100019.
- 1820 51. Jarrett BA, Woznica DM, Tilchin C, Mpungose N, Motlhaoleng K, Golub JE, et al.  
1821 Promoting Tuberculosis Preventive Therapy for People Living with HIV in South  
1822 Africa: Interventions Hindered by Complicated Clinical Guidelines and Imbalanced  
1823 Patient-Provider Dynamics. *AIDS and Behavior*. 2019;24(4):1106-17. doi:  
1824 10.1007/s10461-019-02675-6. PubMed PMID: WOS:000520707300012.
- 1825 52. Khan FA, Verkuijl S, Parrish A, Chikwava F, Ntummy R, El-Sadr W, et al. Performance  
1826 of symptom-based tuberculosis screening among people living with HIV: not as great  
1827 as hoped. *AIDS*. 2014;28(10):1463-72. doi: 10.1097/qad.0000000000000278.  
1828 PubMed PMID: WOS:000337705400009.
- 1829 53. Lai J, Dememew Z, Jerene D, Abashawl A, Feleke B, Teklu AM, et al. Provider  
1830 barriers to the uptake of isoniazid preventive therapy among people living with HIV in  
1831 Ethiopia. *Int J Tuberc Lung Dis*. 2019;23(3):371-7. Epub 2019/03/16. doi:  
1832 10.5588/ijtld.18.0378. PubMed PMID: 30871669; PubMed Central PMCID:  
1833 PMC6822021.
- 1834 54. Lester R, Hamilton R, Charalambous S, Dwadwa T, Chandler C, Churchyard GJ, et  
1835 al. Barriers to implementation of isoniazid preventive therapy in HIV clinics: A  
1836 qualitative study. *AIDS*. 2010;24(SUPPL. 5):S45-S8. doi:  
1837 10.1097/01.aids.0000391021.18284.12.
- 1838 55. Little KM, Khundi M, Barnes GL, Ngwira LG, Nkhoma A, Makombe S, et al.  
1839 Predictors of isoniazid preventive therapy completion among adults newly diagnosed  
1840 with HIV in rural Malawi. *Int J Tuberc Lung Dis*. 2018;22(4):371-7. Epub 2018/03/23.  
1841 doi: 10.5588/ijtld.16.0836.
- 1842 56. McRobie E, Wringe A, Nakiyingi-Miiró J, Kiweewa F, Lutalo T, Nakigozi G, et al. HIV  
1843 policy implementation in two health and demographic surveillance sites in Uganda:  
1844 Findings from a national policy review, health facility surveys and key informant  
1845 interviews. *Implementation Science*. 2017;12(1). doi: 10.1186/s13012-017-0574-z.
- 1846 57. Meribe SC, Adamu Y, Adebayo-Abikoye E, Lawal I, Amazue-Ezeuko I, Okeji N, et al.  
1847 Sustaining tuberculosis preventive therapy scale-up through direct supportive  
1848 supervision. *Public Health Action*. 2020;10(2):60-3. Epub 2020/07/09. doi:  
1849 10.5588/pha.20.0003. PubMed PMID: 32639481; PubMed Central PMCID:  
1850 PMC7316438.
- 1851 58. Mindachew M, Deribew A, Tessema F, Biadgilign S. Predictors of adherence to  
1852 isoniazid preventive therapy among HIV positive adults in Addis Ababa, Ethiopia.  
1853 *BMC public health*. 2011;11(1):916.
- 1854 59. Mugomeri E, Olivier D, van den Heever WMJ. Tracking the rate of initiation and  
1855 retention on isoniazid preventive therapy in a high human immunodeficiency virus  
1856 and tuberculosis burden setting of Lesotho. *Southern African Journal of Infectious  
1857 Diseases*. 2019;34(1). doi: 10.4102/sajid.v34i1.10. PubMed PMID:  
1858 WOS:000519626300001.
- 1859 60. Munseri P, Talbot E, Mtei L, Fordham von Reyn C. Completion of isoniazid  
1860 preventive therapy among HIV-infected patients in Tanzania. *Int J Tuberc Lung Dis*.  
1861 2008;12(9):1037-41.
- 1862 61. Ngamvithayapong J, Uthavivoravit W, Yanai H, Akarasewi P, Sawanpanyalert P.  
1863 Adherence to tuberculosis preventive therapy among HIV-infected persons in Chiang  
1864 Rai, Thailand. *AIDS*. 1997;11(1):107-12.
- 1865 62. Reddy MM, Thekkur P, Ramya N, Kamath PBT, Shastri SG, Kumar RBN, et al. To  
1866 start or to complete? - Challenges in implementing tuberculosis preventive therapy

## Implementation of cotrimoxazole and isoniazid – preventive therapies for people with HIV.

- 1867 among people living with HIV: a mixed-methods study from Karnataka, India. *Glob*  
1868 *Health Action.* 2020;13(1):1704540. Epub 2020/01/16. doi:  
1869 10.1080/16549716.2019.1704540. PubMed PMID: 31937200; PubMed Central  
1870 PMCID: PMC7006687.
- 1871 63. Rowe KA, Makhubele B, Hargreaves JR, Porter JD, Hausler HP, Pronyk PM.  
1872 Adherence to TB preventive therapy for HIV-positive patients in rural South Africa:  
1873 implications for antiretroviral delivery in resource-poor settings? *Int J Tuberc Lung*  
1874 *Dis.* 2005;9(3):263-9. Epub 2005/03/25. PubMed PMID: 15786888.
- 1875 64. Selehelo K, Makhado L, Madiba KA. Provision of Isoniazid Preventive Therapy: The  
1876 Experiences of People Living with HIV. *African Journal of Nursing and Midwifery.*  
1877 2019;21(2). doi: 10.25159/2520-5293/6221. PubMed PMID:  
1878 WOS:000532581600019.
- 1879 65. Szakacs TA, Wilson D, Cameron DW, Clark M, Kocheleff P, Muller FJ, et al.  
1880 Adherence with isoniazid for prevention of tuberculosis among HIV-infected adults in  
1881 South Africa. *BMC infectious diseases.* 2006;6(1):97.
- 1882 66. Tram KH, Mwangwa F, Chamie G, Atukunda M, Owaraganise A, Ayieko J, et al.  
1883 Predictors of isoniazid preventive therapy completion among HIV-infected patients  
1884 receiving differentiated and non-differentiated HIV care in rural Uganda. *AIDS Care.*  
1885 2019;32(1):119-27. doi: 10.1080/09540121.2019.1619661. PubMed PMID:  
1886 WOS:000498969900018.
- 1887 67. Van Ginderdeuren E, Bassett J, Hanrahan C, Mutunga L, Van Rie A. Health system  
1888 barriers to implementation of TB preventive strategies in South African primary care  
1889 facilities. *PLoS ONE.* 2019;14(2):e0212035. Epub 2019/02/15. doi:  
1890 10.1371/journal.pone.0212035. PubMed PMID: 30763378; PubMed Central PMCID:  
1891 PMC6375590.
- 1892 68. Wambiya EOA, Atela M, Eboreime E, Ibisomi L. Factors affecting the acceptability of  
1893 isoniazid preventive therapy among healthcare providers in selected HIV clinics in  
1894 Nairobi County, Kenya: a qualitative study. *BMJ Open.* 2018;8(12):e024286. Epub  
1895 2018/12/24. doi: 10.1136/bmjopen-2018-024286. PubMed PMID: 30573488; PubMed  
1896 Central PMCID: PMC6303693.
- 1897 69. The World Bank. World Bank country and lending groups 2021. Available from:  
1898 [https://datahelpdesk.worldbank.org/knowledgebase/articles/906519-world-bank-](https://datahelpdesk.worldbank.org/knowledgebase/articles/906519-world-bank-country-and-lending-groups)  
1899 [country-and-lending-groups](https://datahelpdesk.worldbank.org/knowledgebase/articles/906519-world-bank-country-and-lending-groups).
- 1900 70. Kates J, Wexler A, Lief E. Donor government funding for HIV in low-and middle-  
1901 income countries in 2019 2020. Available from: [https://files.kff.org/attachment/Donor-](https://files.kff.org/attachment/Donor-Government-Funding-for-HIV-in-Low-and-Middle-Income-Countries-in-2019.pdf)  
1902 [Government-Funding-for-HIV-in-Low-and-Middle-Income-Countries-in-2019.pdf](https://files.kff.org/attachment/Donor-Government-Funding-for-HIV-in-Low-and-Middle-Income-Countries-in-2019.pdf).
- 1903 71. Assefa Y, Gilks CF. Ending the epidemic of HIV/AIDS by 2030: Will there be an  
1904 endgame to HIV, or an endemic HIV requiring an integrated health systems response  
1905 in many countries? *International Journal of Infectious Diseases.* 2020;100:273-7. doi:  
1906 <https://doi.org/10.1016/j.ijid.2020.09.011>.
- 1907 72. Luboga SA, Stover B, Lim TW, Makumbi F, Kiwanuka N, Lubega F, et al. Did  
1908 PEPFAR investments result in health system strengthening? A retrospective  
1909 longitudinal study measuring non-HIV health service utilization at the district level.  
1910 *Health Policy Plan.* 2016;31(7):897-909. Epub 2016/03/27. doi:  
1911 10.1093/heapol/czw009. PubMed PMID: 27017824.
- 1912 73. Mikkelsen E, Hontelez JA, Jansen MP, Bärnighausen T, Hauck K, Johansson KA, et  
1913 al. Evidence for scaling up HIV treatment in sub-Saharan Africa: a call for  
1914 incorporating health system constraints. *PLoS medicine.* 2017;14(2):e1002240.

## Implementation of cotrimoxazole and isoniazid – preventive therapies for people with HIV.

- 1915 74. Vitoria M, Granich R, Banda M, Fox MY, Gilks C. Implementation of co-trimoxazole  
1916 prophylaxis and isoniazid preventive therapy for people living with HIV. Bulletin of the  
1917 World Health Organization. 2010;88:253-9.
- 1918 75. Kunkel A, Colijn C, Lipsitch M, Cohen T. How could preventive therapy affect the  
1919 prevalence of drug resistance? Causes and consequences. Philosophical  
1920 Transactions of the Royal Society B: Biological Sciences. 2015;370(1670):20140306.
- 1921 76. Kafu C, Wachira J, Braitstein P, Wilson I, Koech B, Kamene R, et al. Provider  
1922 perspectives on the role of the patient as an active participant in HIV care. Global  
1923 public health. 2020:1-11. doi: 10.1080/17441692.2020.1830296.
- 1924 77. Clinical Laboratory Standards Institute. Performance Standards for Antimicrobial  
1925 Susceptibility Testing, 31st Edition: CLSI; 2020 [cited 35]. 1-332]. Available from:  
1926 <https://clsi.org/standards/products/microbiology/documents/m100-preorder/>.
- 1927 78. Ersoy SC, Heithoff DM, Barnes Lt, Tripp GK, House JK, Marth JD, et al. Correcting a  
1928 Fundamental Flaw in the Paradigm for Antimicrobial Susceptibility Testing.  
1929 EBioMedicine. 2017;20:173-81. Epub 2017/05/29. doi: 10.1016/j.ebiom.2017.05.026.  
1930 PubMed PMID: 28579300.
- 1931 79. Zachariah R, Massaquoi M. Cotrimoxazole prophylaxis for HIV-positive TB patients in  
1932 developing countries. Tropical doctor. 2006;36(2):79-82.
- 1933 80. Mansoor L, Dowse R. Written medicines information for South African HIV/AIDS  
1934 patients: does it enhance understanding of co-trimoxazole therapy? Health Education  
1935 Research. 2006;22(1):37-48. doi: 10.1093/her/cyl039.
- 1936 81. Kenny T, Wilson R, Purves I, Clark Sr J, Newton L, Newton D, et al. A PIL for every  
1937 ill? Patient information leaflets (PILs): a review of past, present and future use.  
1938 Family Practice. 1998;15(5):471-9. doi: 10.1093/fampra/15.5.471.
- 1939 82. Hauck K, Morton A, Chalkidou K, Chi Y-L, Culyer A, Levin C, et al. How can we  
1940 evaluate the cost-effectiveness of health system strengthening? A typology and  
1941 illustrations. Social science & medicine. 2019;220:141-9. doi:  
1942 10.1016/j.socscimed.2018.10.030.
- 1943 83. Steurs L, Orbie J, Delputte S, Verschaeve J. EU Donors and health system  
1944 strengthening: the love-hate relationship with the Global Fund. Development Studies  
1945 Research. 2018;5(sup1):S1-S13.
- 1946 84. USAID. USAID's vision for health systems strengthening 2030: Author Washington,  
1947 DC; 2021. Available from:  
1948 [https://www.usaid.gov/sites/default/files/documents/USAID\\_OHS\\_VISION\\_Report\\_FINAL\\_single\\_5082.pdf](https://www.usaid.gov/sites/default/files/documents/USAID_OHS_VISION_Report_FINAL_single_5082.pdf).  
1949
- 1950 85. World Health Organization. Healthy systems for universal health coverage: a joint  
1951 vision for healthy lives 2018. Available from:  
1952 [https://www.uhc2030.org/fileadmin/uploads/uhc2030/Documents/About\\_UHC2030/mgt\\_arrangemts\\_docs/UHC2030\\_Official\\_documents/UHC2030\\_vision\\_paper\\_WEB\\_2.pdf](https://www.uhc2030.org/fileadmin/uploads/uhc2030/Documents/About_UHC2030/mgt_arrangemts_docs/UHC2030_Official_documents/UHC2030_vision_paper_WEB_2.pdf).  
1953  
1954
- 1955 86. Global Fund. The Global Fund Strategy 2017–2022: investing to end epidemics:  
1956 Reliefweb; 2017. Available from:  
1957 [https://www.theglobalfund.org/media/2531/core\\_globalfundstrategy2017-2022\\_strategy\\_en.pdf](https://www.theglobalfund.org/media/2531/core_globalfundstrategy2017-2022_strategy_en.pdf).  
1958
- 1959 87. USAID. ADS Chapter 220: Use and Strengthening of Reliable Partner Government  
1960 Systems for Implementation of Direct Assistance 2014. Available from: <https://2012-2017.usaid.gov/sites/default/files/documents/1868/220.pdf>.  
1961

## Implementation of cotrimoxazole and isoniazid – preventive therapies for people with HIV.

- 1962 88. Rwabukwisi FC, Bawah AA, Gimbel S, Phillips JF, Mutale W, Drobac P. Health  
1963 system strengthening: a qualitative evaluation of implementation experience and  
1964 lessons learned across five African countries. BMC health services research.  
1965 2017;17(3):77-89.

## 1966 **Supporting information**

### 1967 **Tables**

1968 Table 1. Main characteristics of the studies included in this review.

1969 Table 2. List of facilitators for the implementation of CPT and IPT.

### 1970 **Figures**

1971 Fig 1. PRISMA Flow Diagram.

1972 Fig 2. Regional representation of countries included in this review.

1973 Fig 3. Metasummary: Barriers to cotrimoxazole preventive therapy for people living with HIV.

1974 Fig 4. Metasummary: Barriers to isoniazid preventive therapy for people living with HIV.

1975 Fig 5. The preventive therapy cascade.

### 1976 **Additional files**

1977 S1 Additional file. PICo Framework (Modified PICO).

1978 S2 Additional file. Systematic review protocol.

1979 S3 Additional file. PRISMA checklist.

1980 S4 Additional file. Database searches and results.

1981 S5 Additional file. Mixed method quality appraisal tool (MMAT) and user guide.

1982 S6 Additional file. Detailed description of studies included in this review.

1983 S7 Additional file. Assessment of methodological strengths and limitations.

1984 S8 Additional file. Metasummary tables.



# PRISMA 2009 Flow Diagram

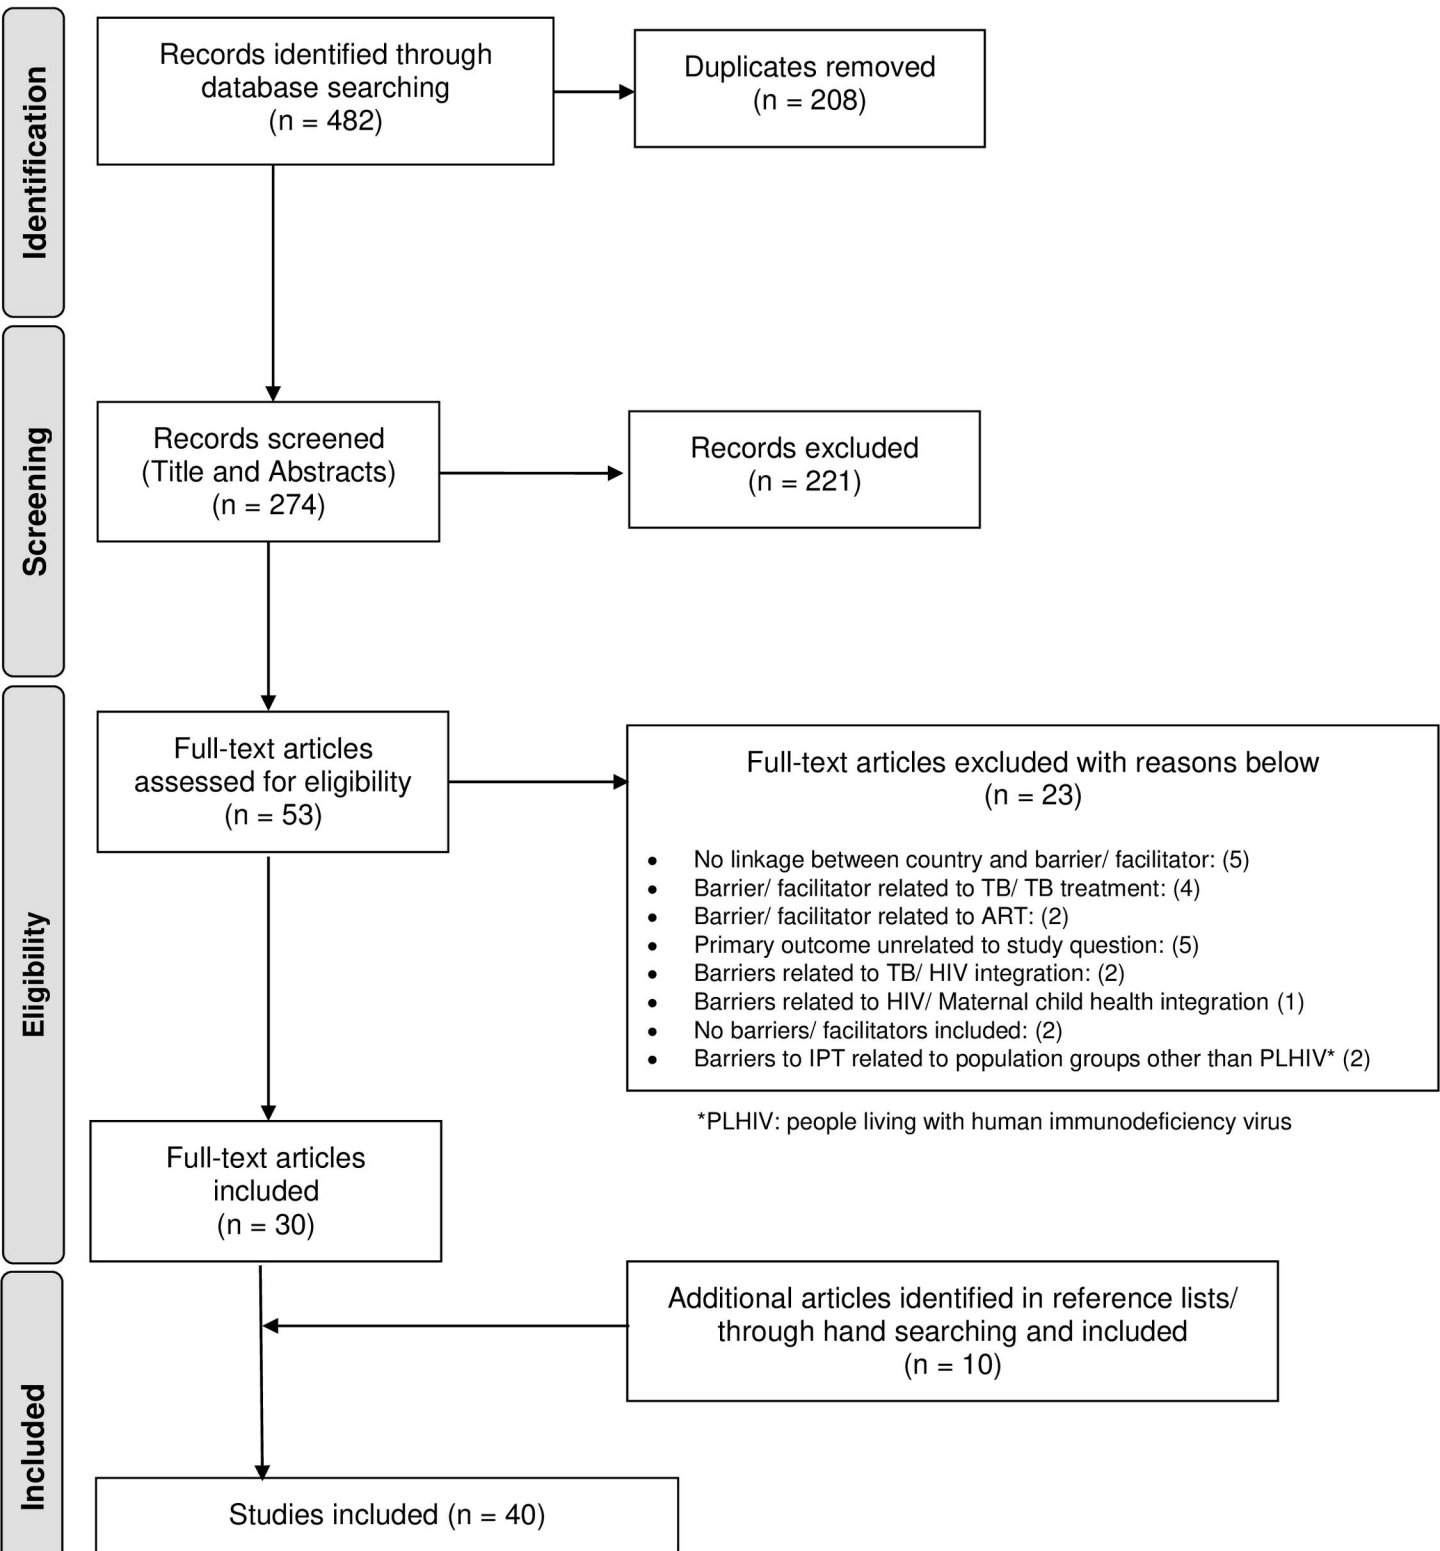

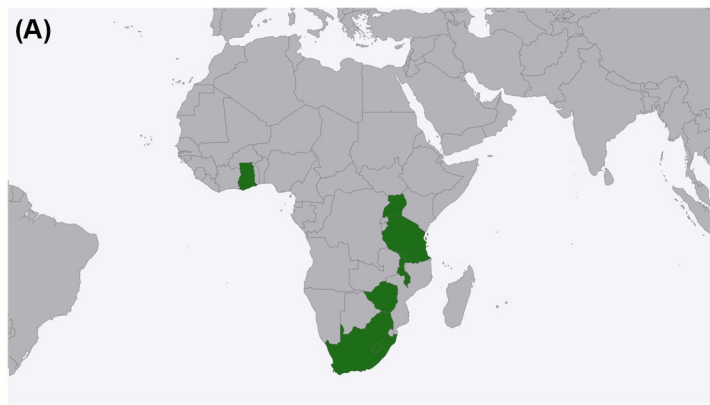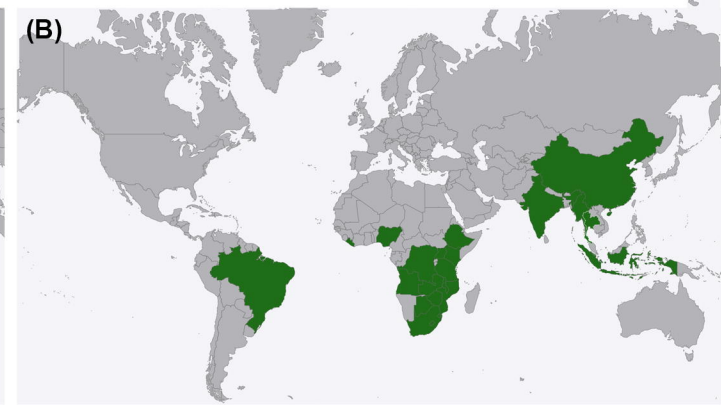

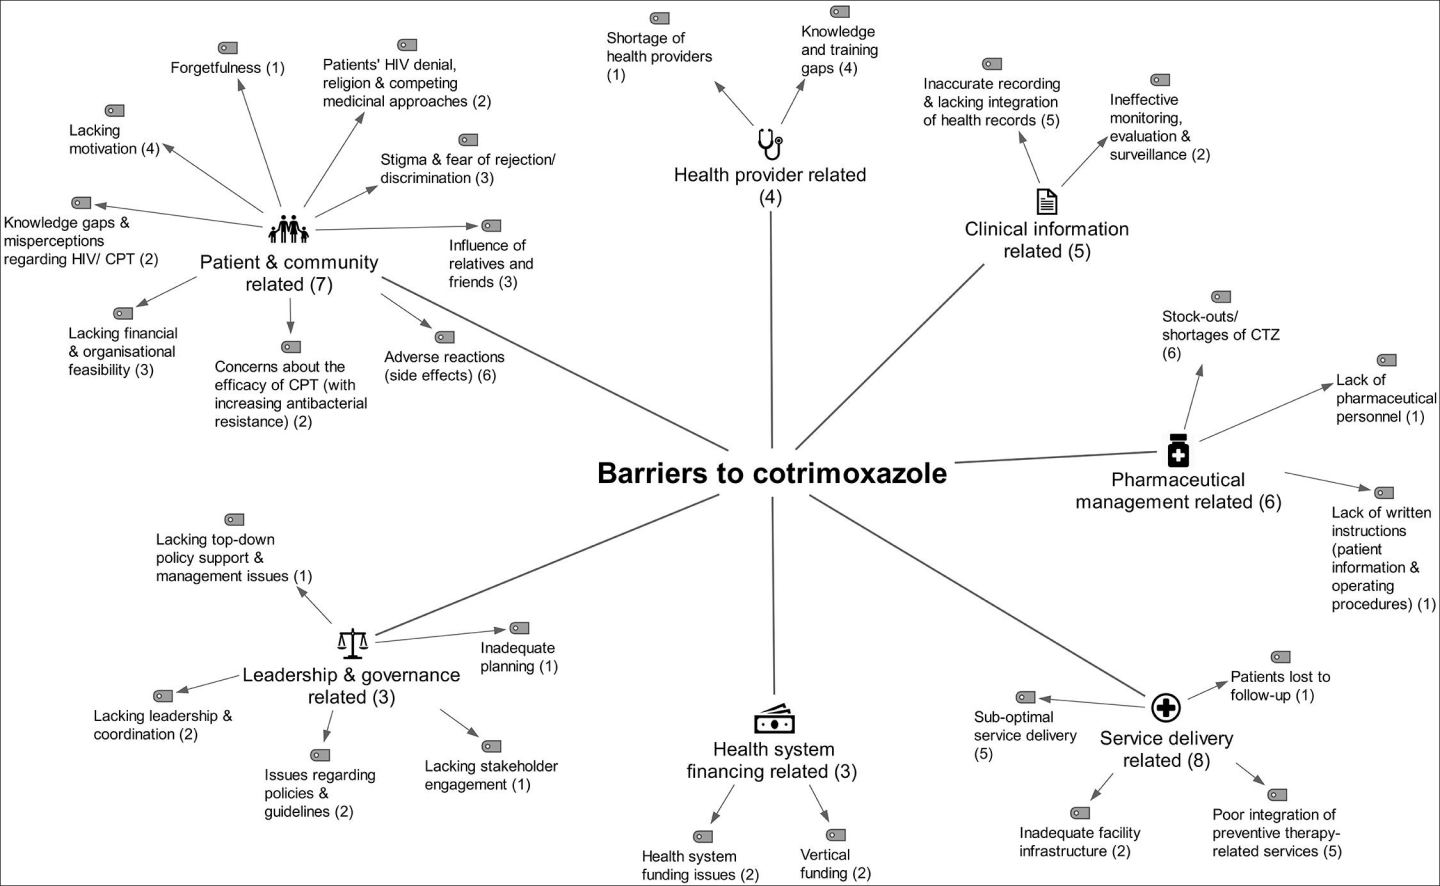

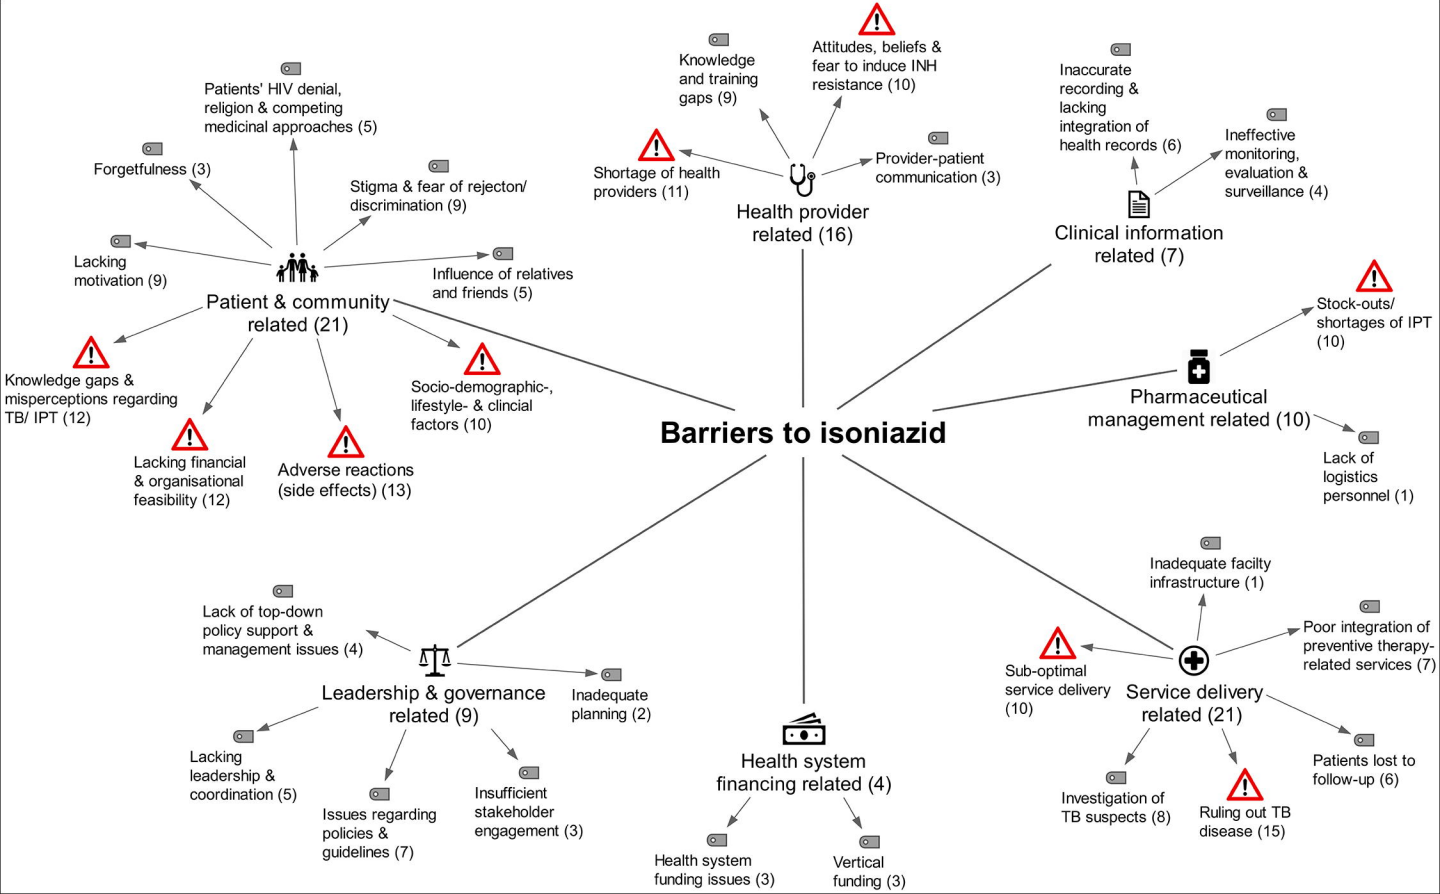

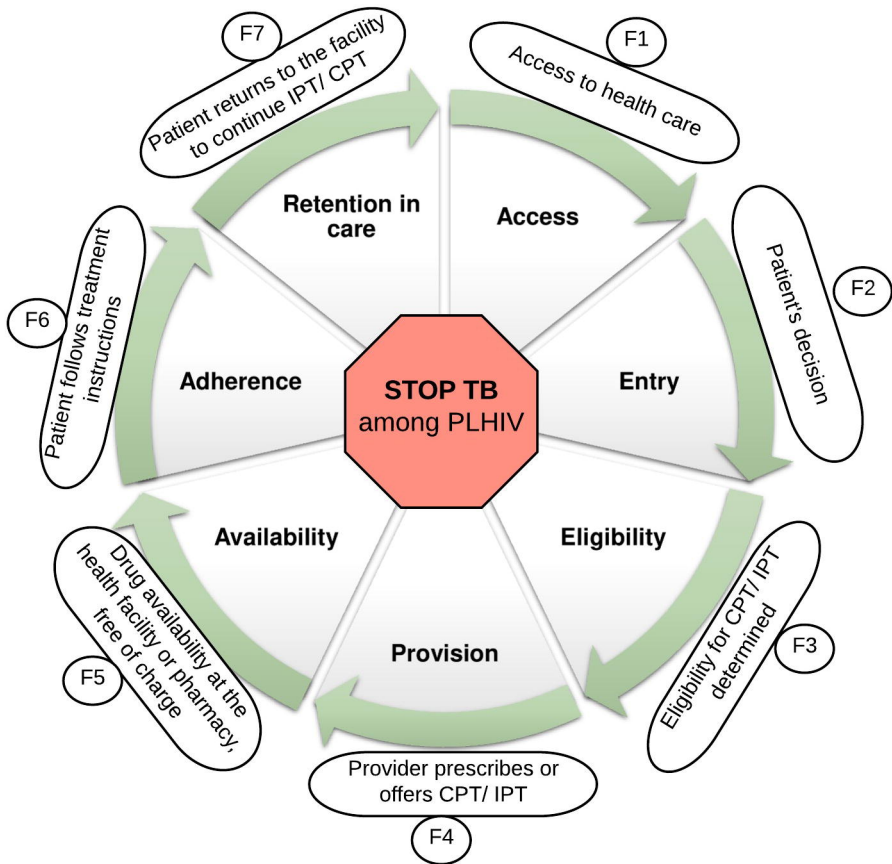

Source: https://medrxiv.org/content/10.1101/2021.04.30.21256370.full.pdf
